# Supplementary material for: PISM-LakeCC: Implementing an adaptive proglacial lake boundaryinto an ice sheet model
Source: Copernicus journal article supplement (doi:10.5194/tc-2020-353), 2020-12-16
Supplement: Supplementary file 1 [file tc-2020-353-supplement.pdf]

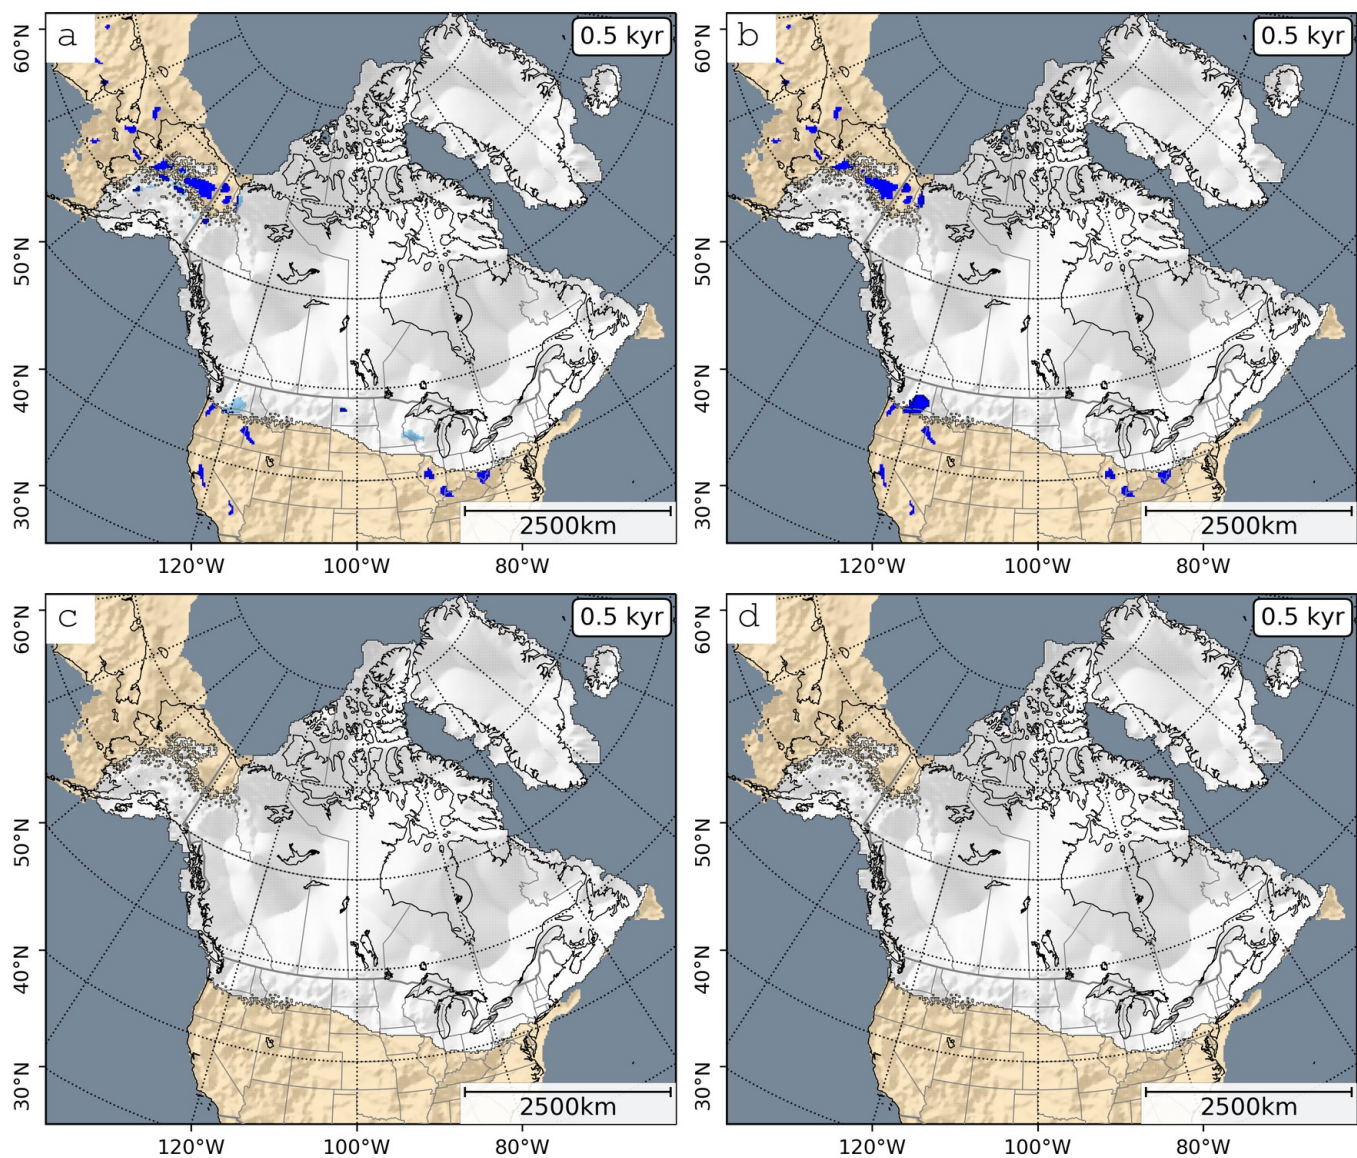

Figure S1: Overview map at 500 kyr for the different experiments: a) LCC, b) LNS, c) Ctrl and d) Def.

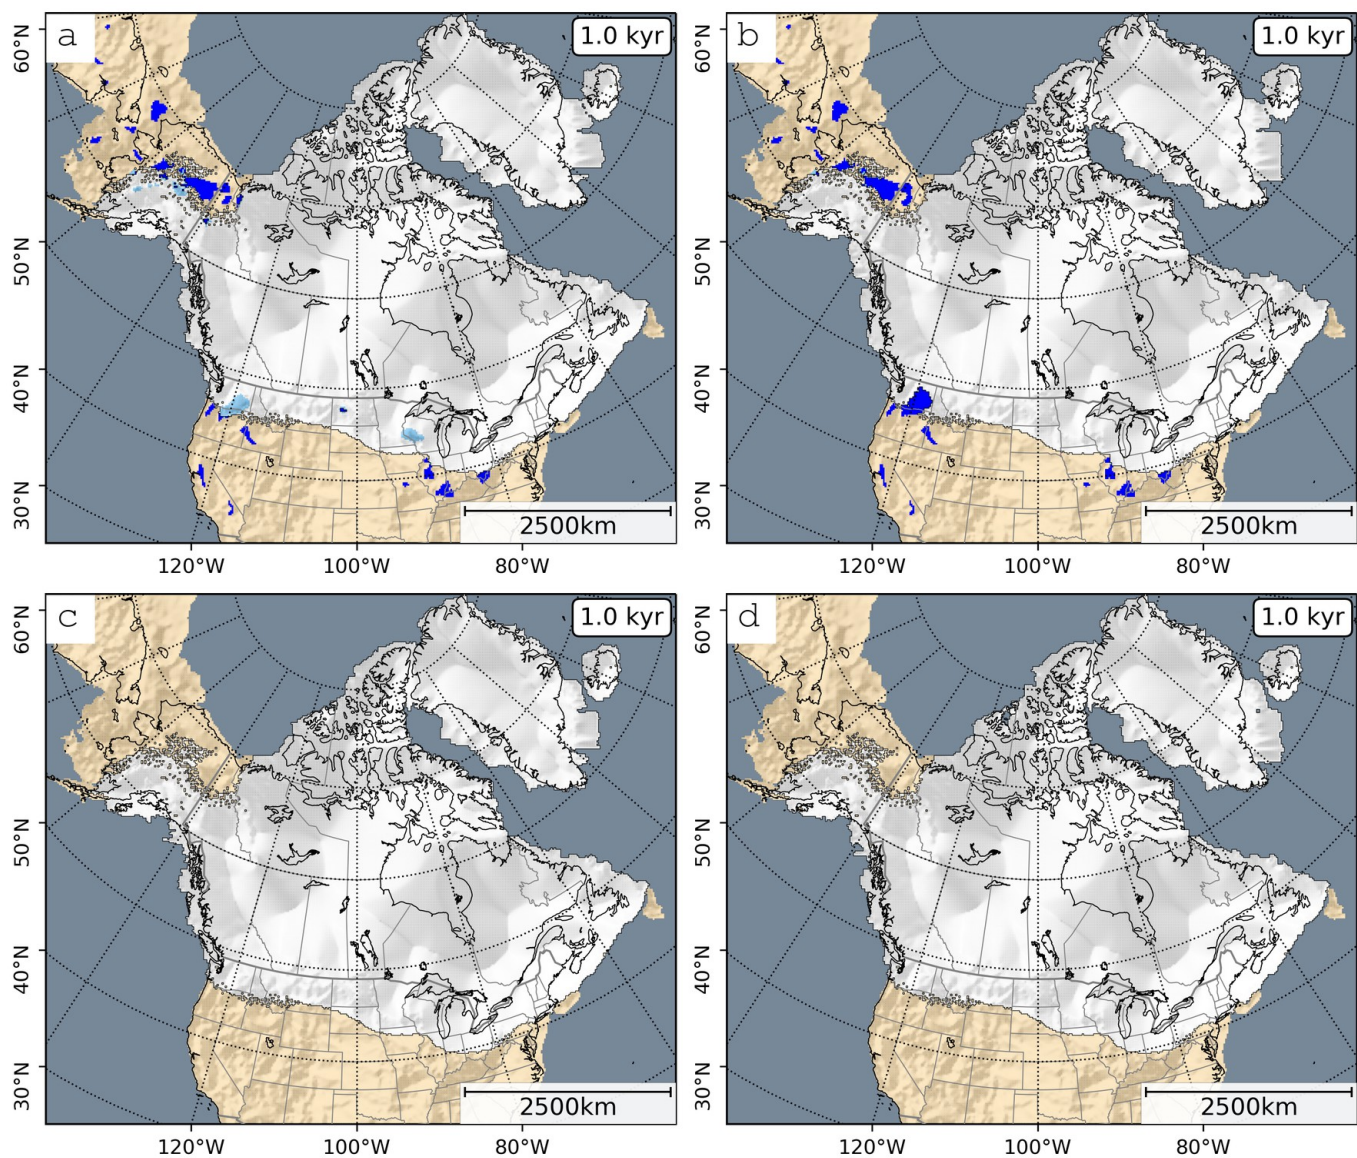

Figure S2: Overview map at 1000 kyr for the different experiments: a) LCC, b) LNS, c) Ctrl and d) Def.



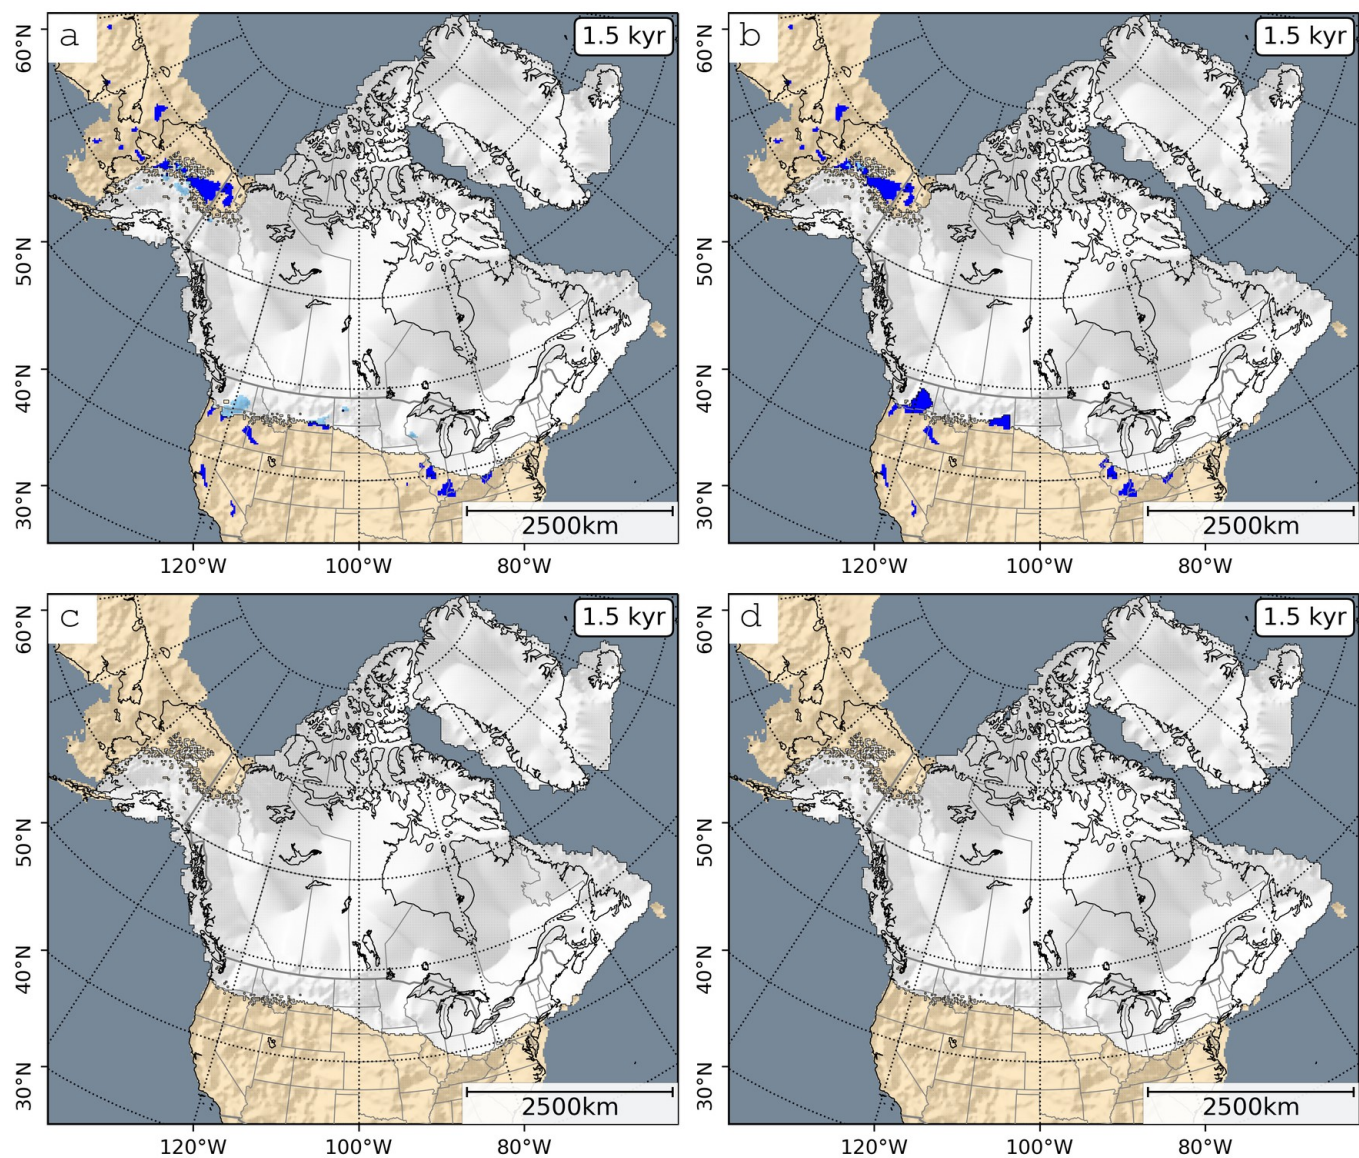

Figure S3: Overview map at 1500 kyr for the different experiments: a) LCC, b) LNS, c) Ctrl and d) Def.

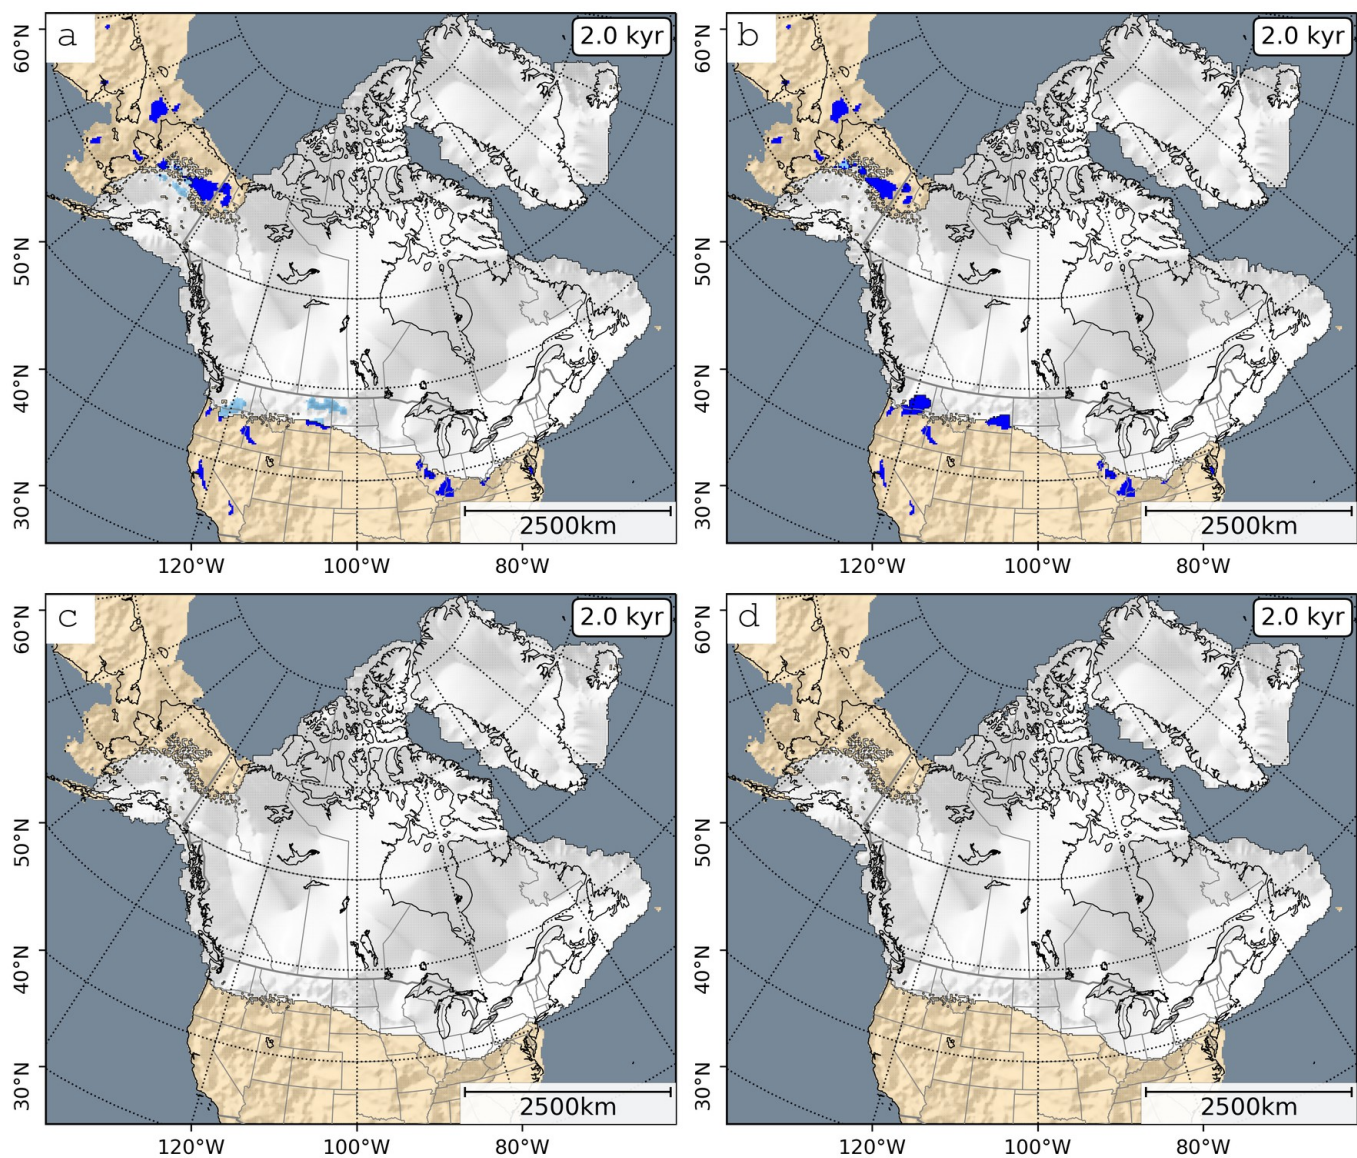

Figure S4: Overview map at 2000 kyr for the different experiments: a) LCC, b) LNS, c) Ctrl and d) Def.



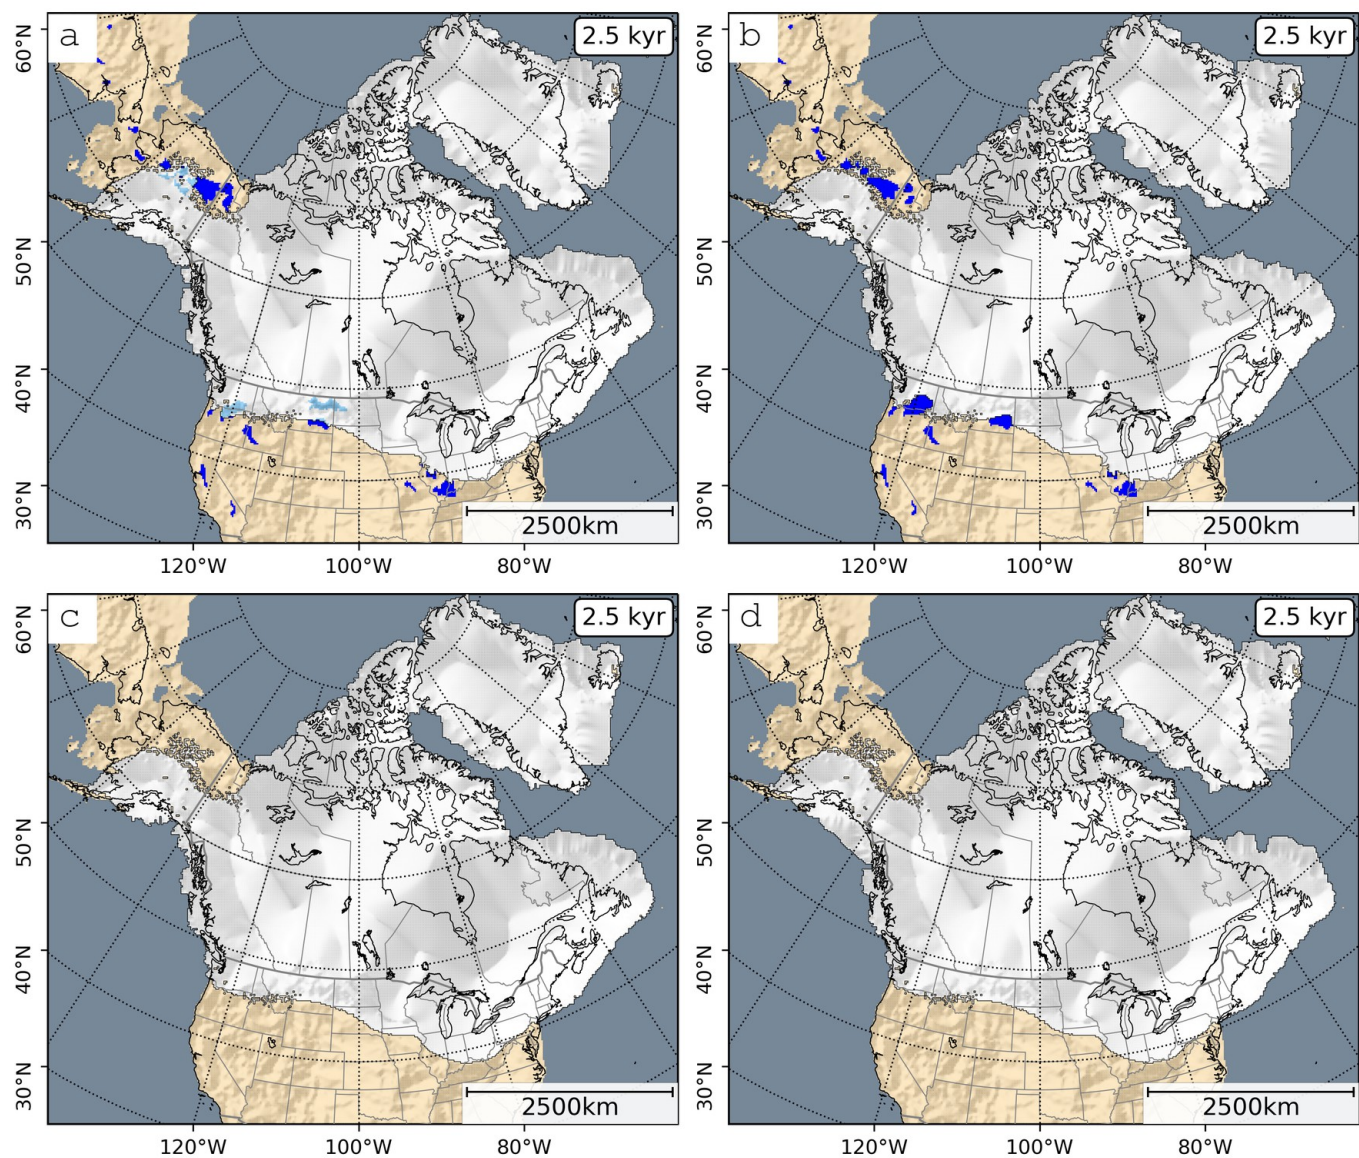

Figure S5: Overview map at 2500 kyr for the different experiments: a) LCC, b) LNS, c) Ctrl and d) Def.

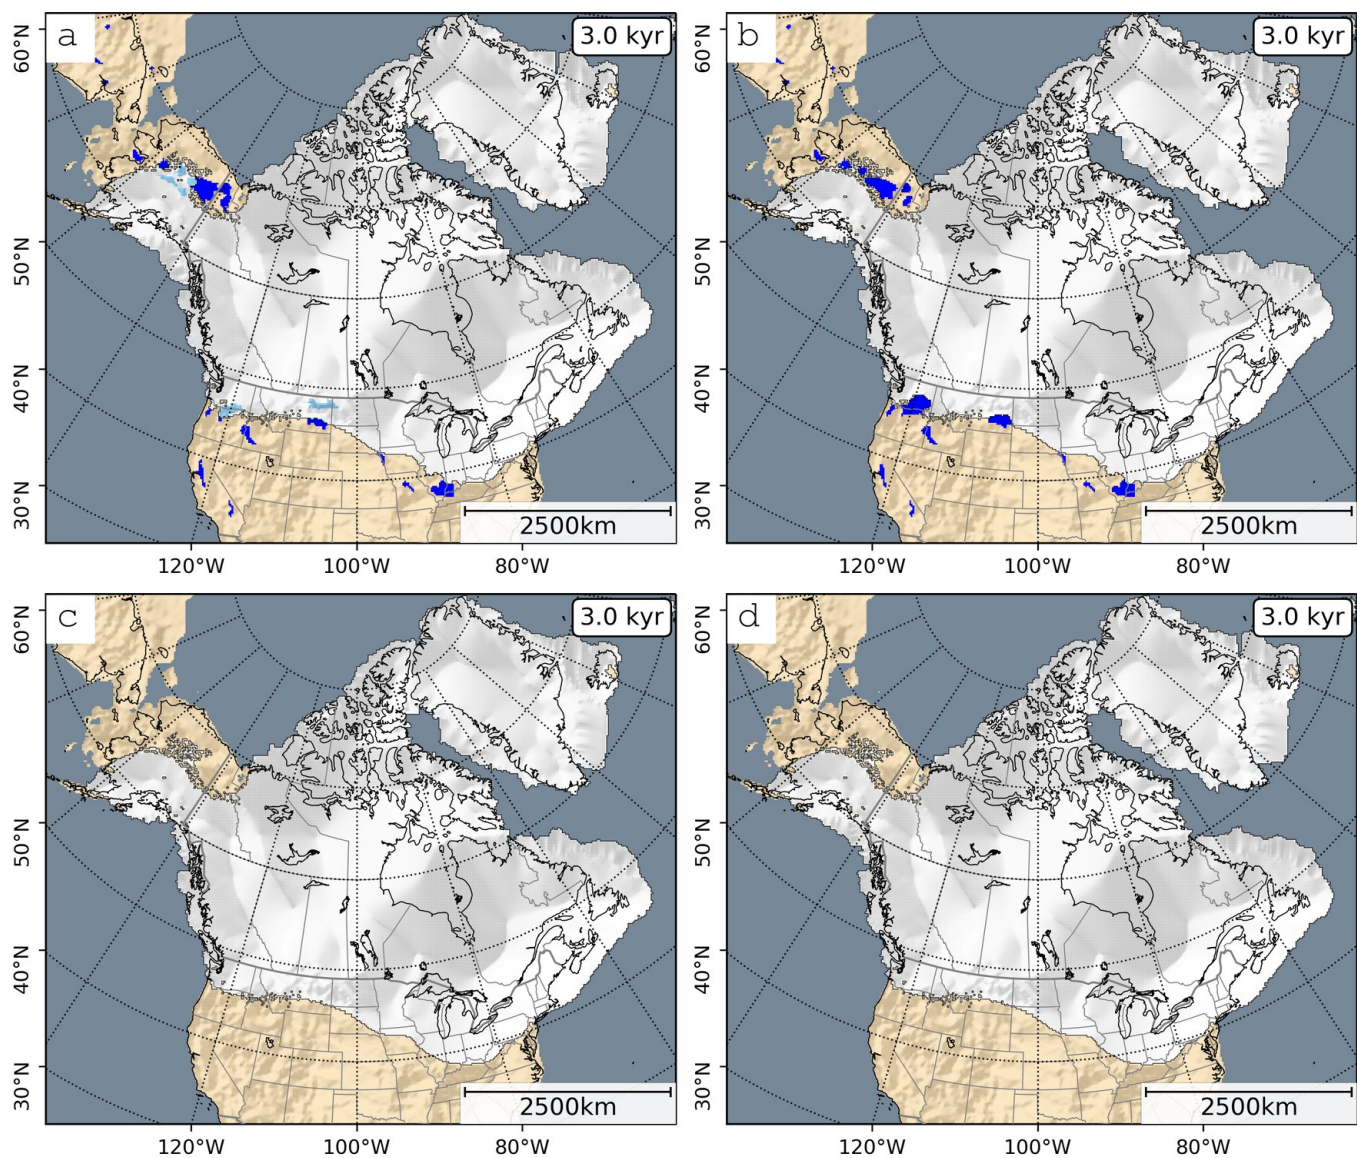

Figure S6: Overview map at 3000 kyr for the different experiments: a) LCC, b) LNS, c) Ctrl and d) Def.



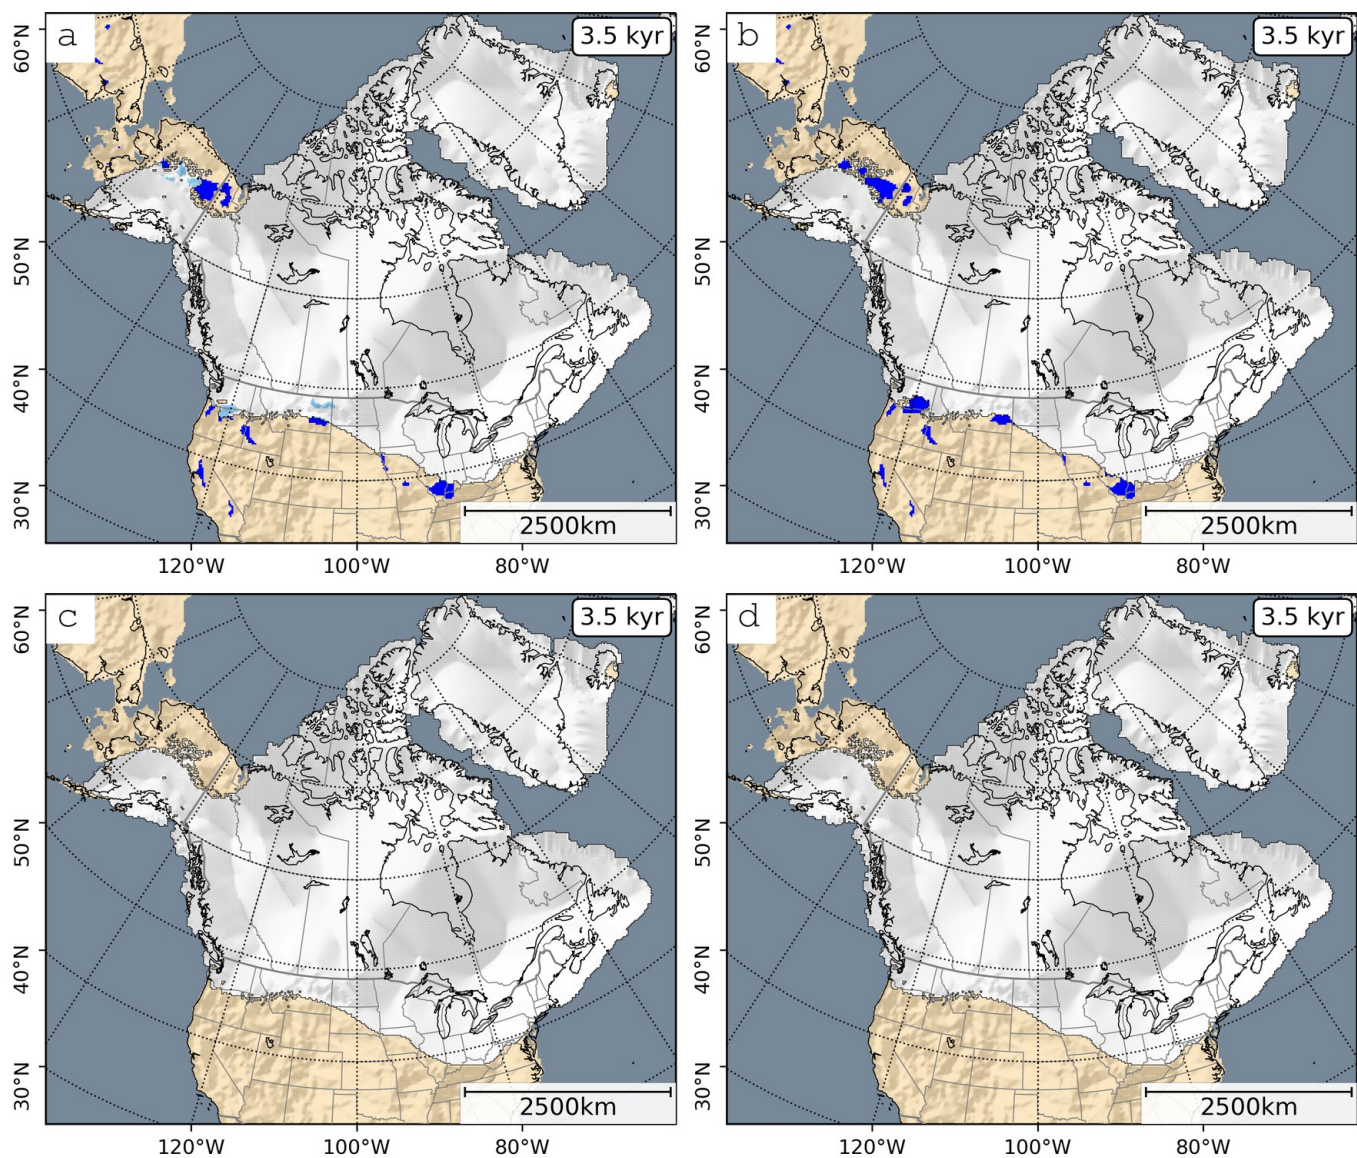

Figure S7: Overview map at 3500 kyr for the different experiments: a) LCC, b) LNS, c) Ctrl and d) Def.

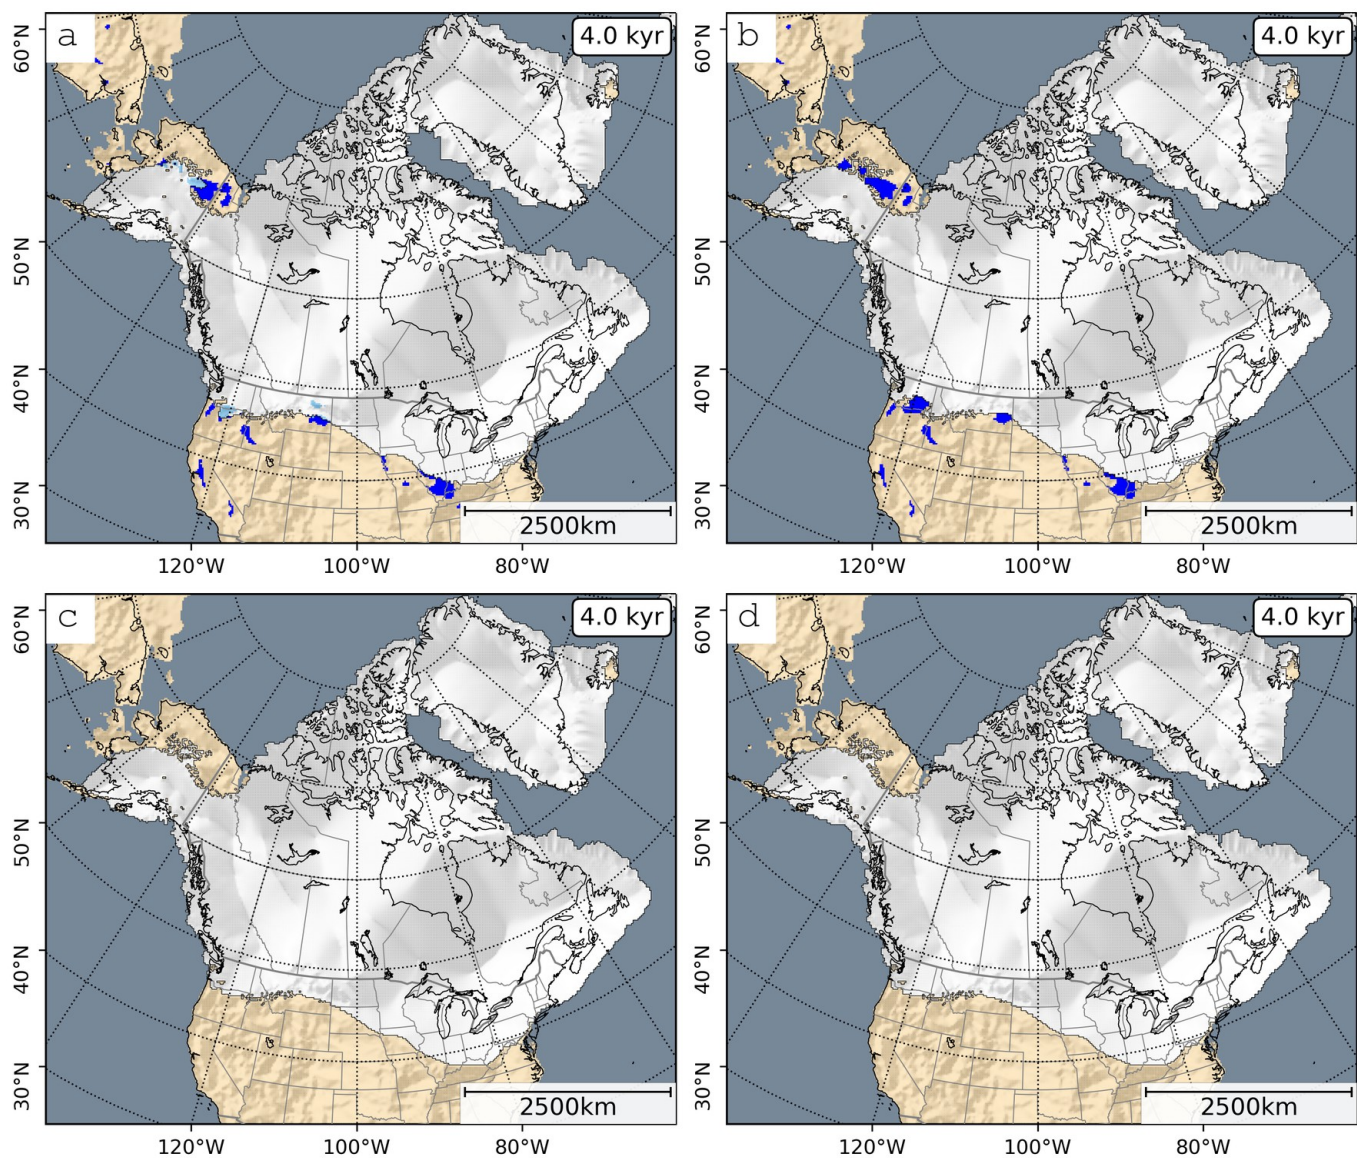

Figure S8: Overview map at 4000 kyr for the different experiments: a) LCC, b) LNS, c) Ctrl and d) Def.



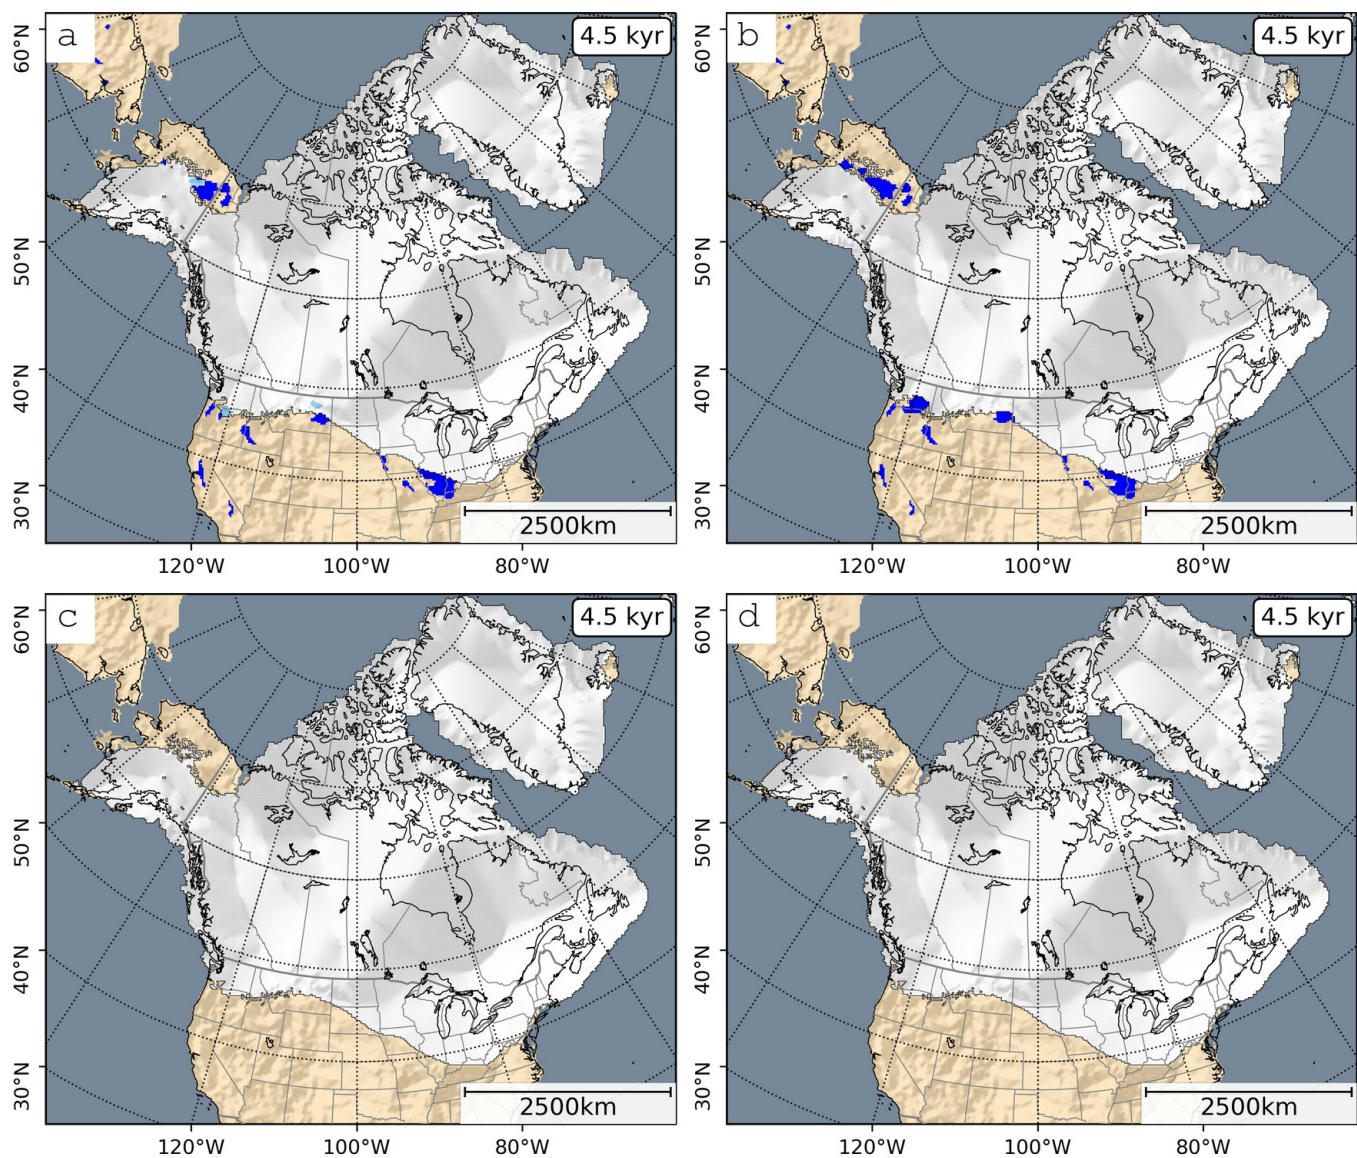

Figure S9: Overview map at 4500 kyr for the different experiments: a) LCC, b) LNS, c) Ctrl and d) Def.

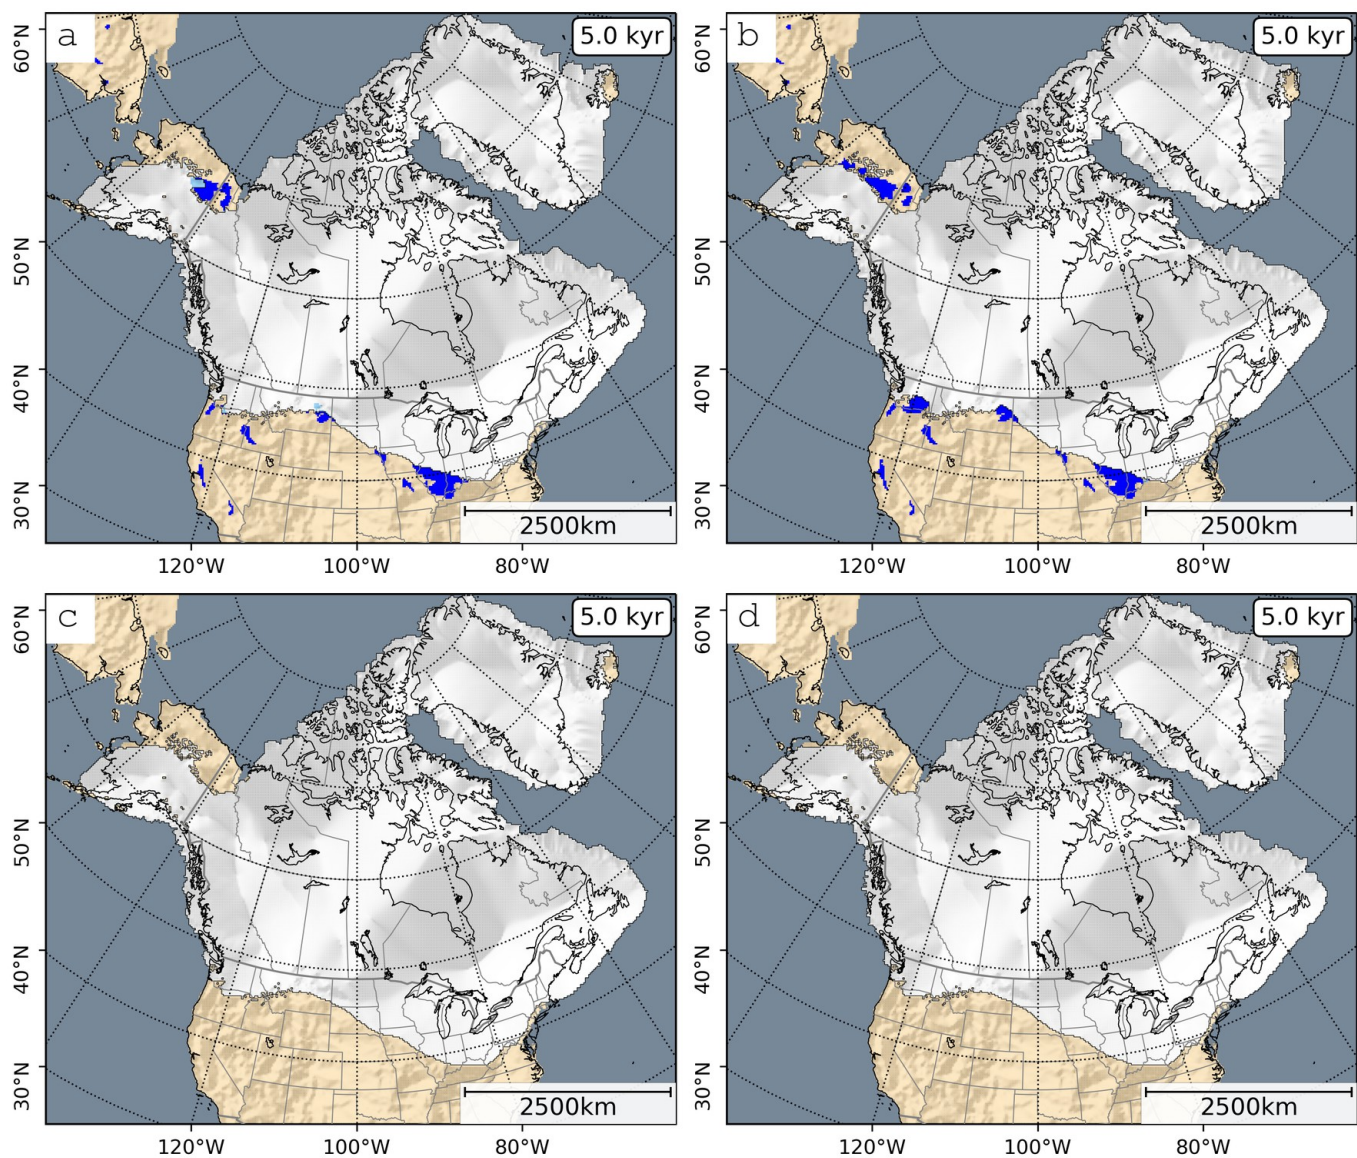

Figure S10: Overview map at 5000 kyr for the different experiments: a) LCC, b) LNS, c) Ctrl and d) Def.



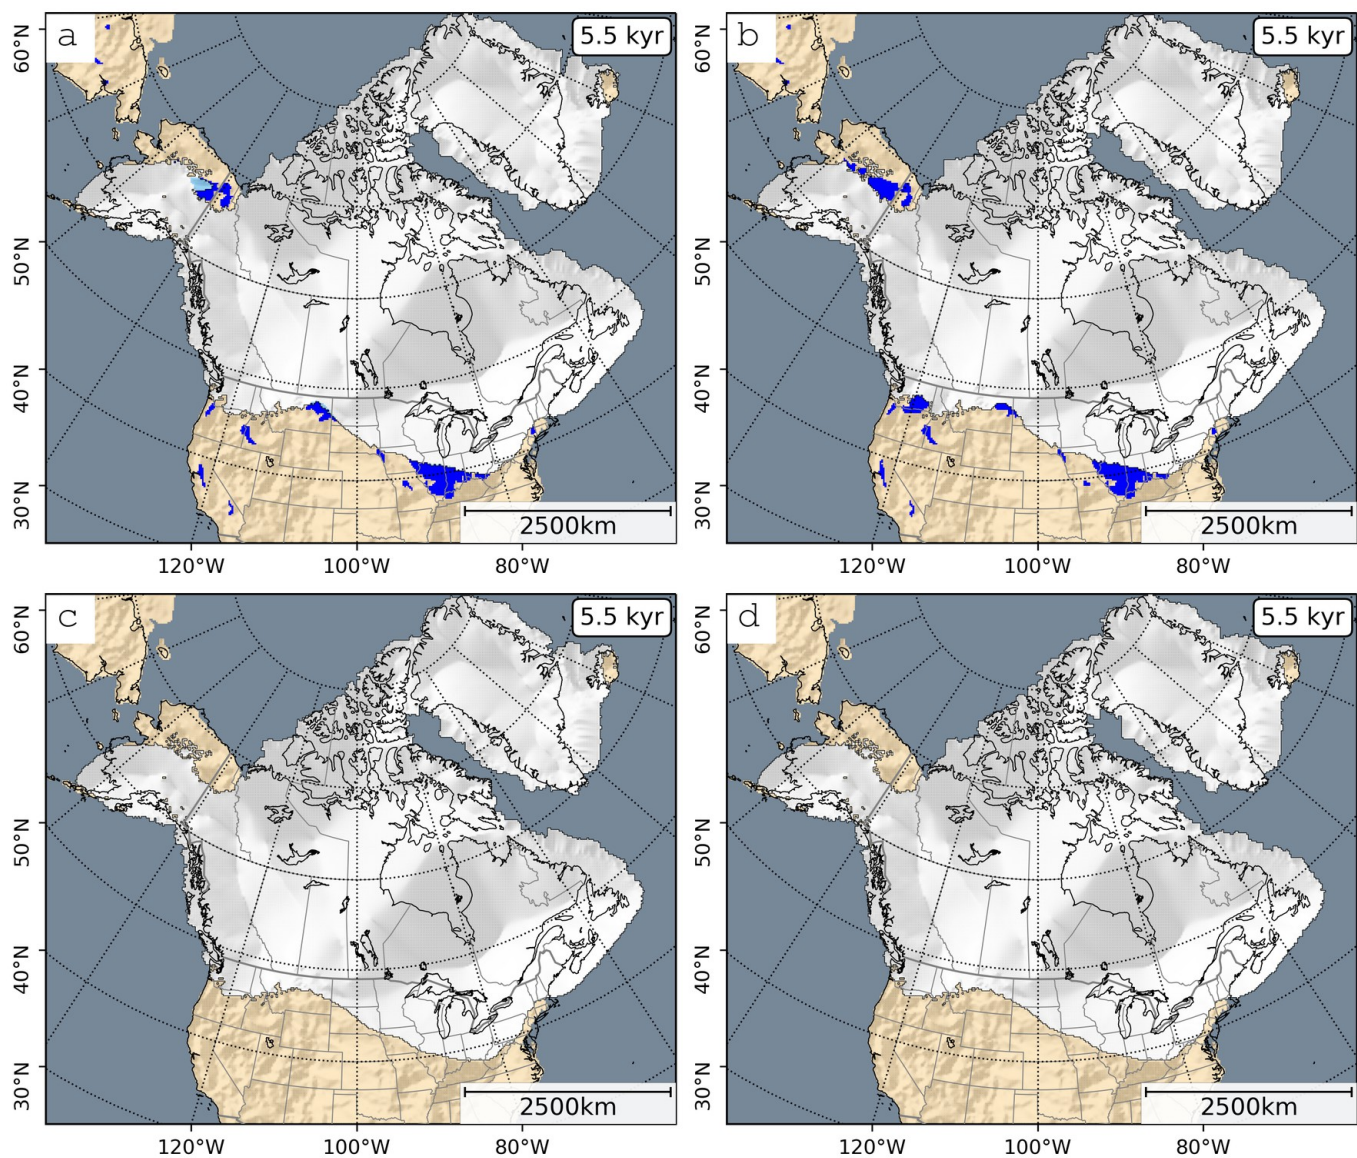

Figure S11: Overview map at 5500 kyr for the different experiments: a) LCC, b) LNS, c) Ctrl and d) Def.

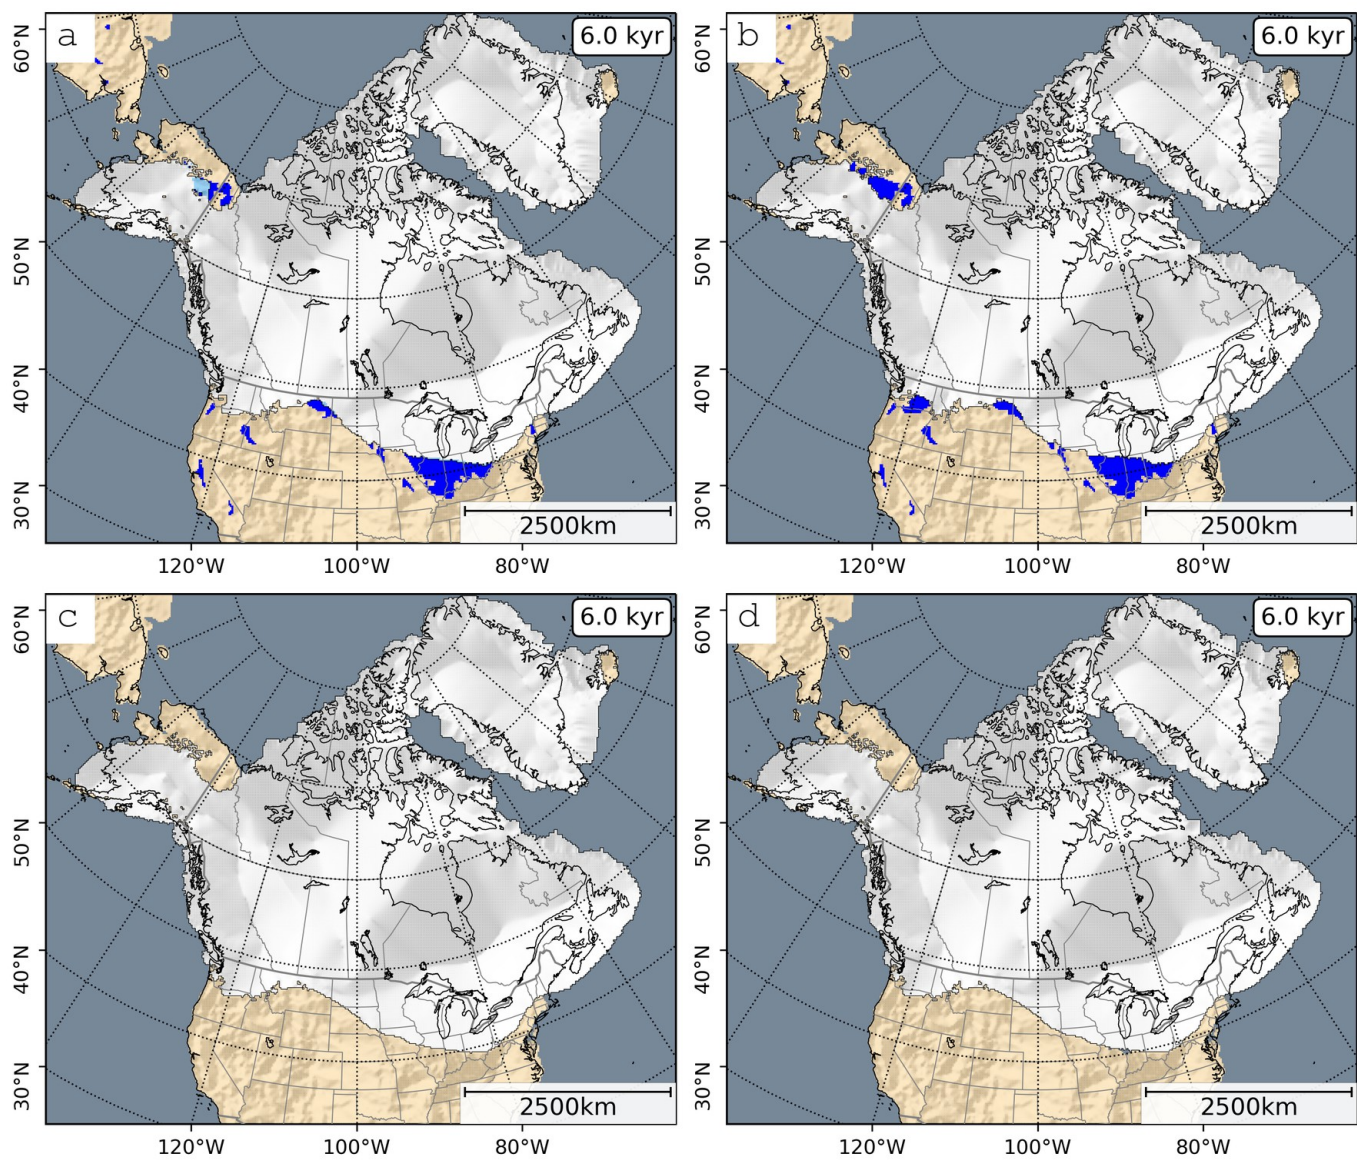

Figure S12: Overview map at 6000 kyr for the different experiments: a) LCC, b) LNS, c) Ctrl and d) Def.



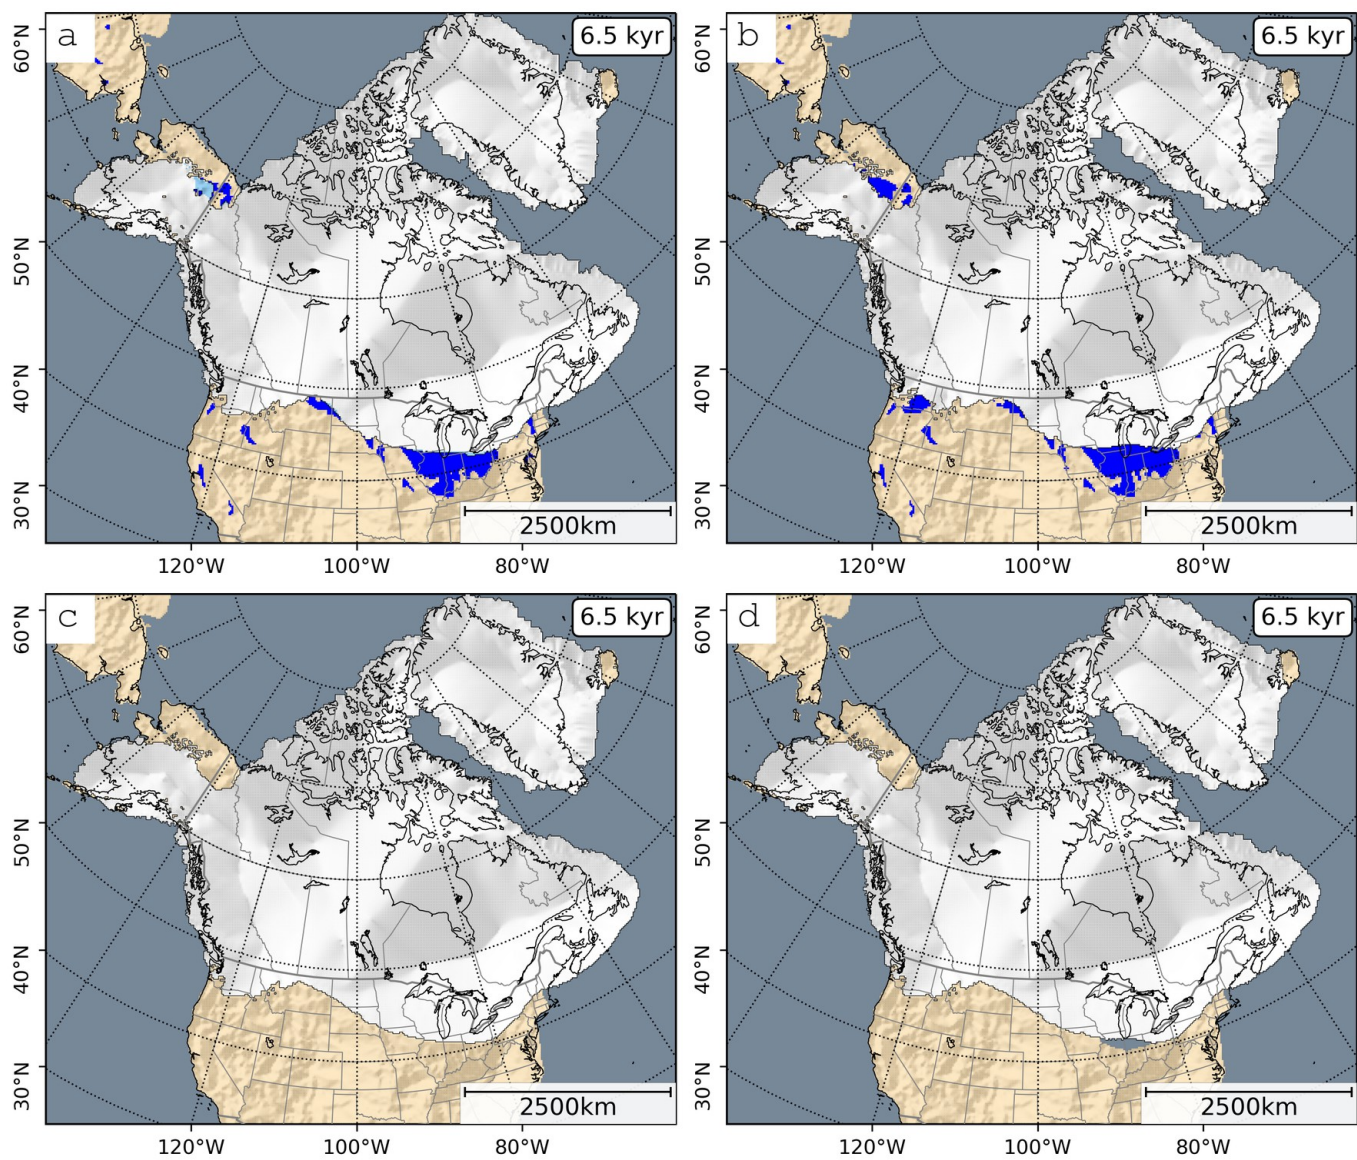

Figure S13: Overview map at 6500 kyr for the different experiments: a) LCC, b) LNS, c) Ctrl and d) Def.

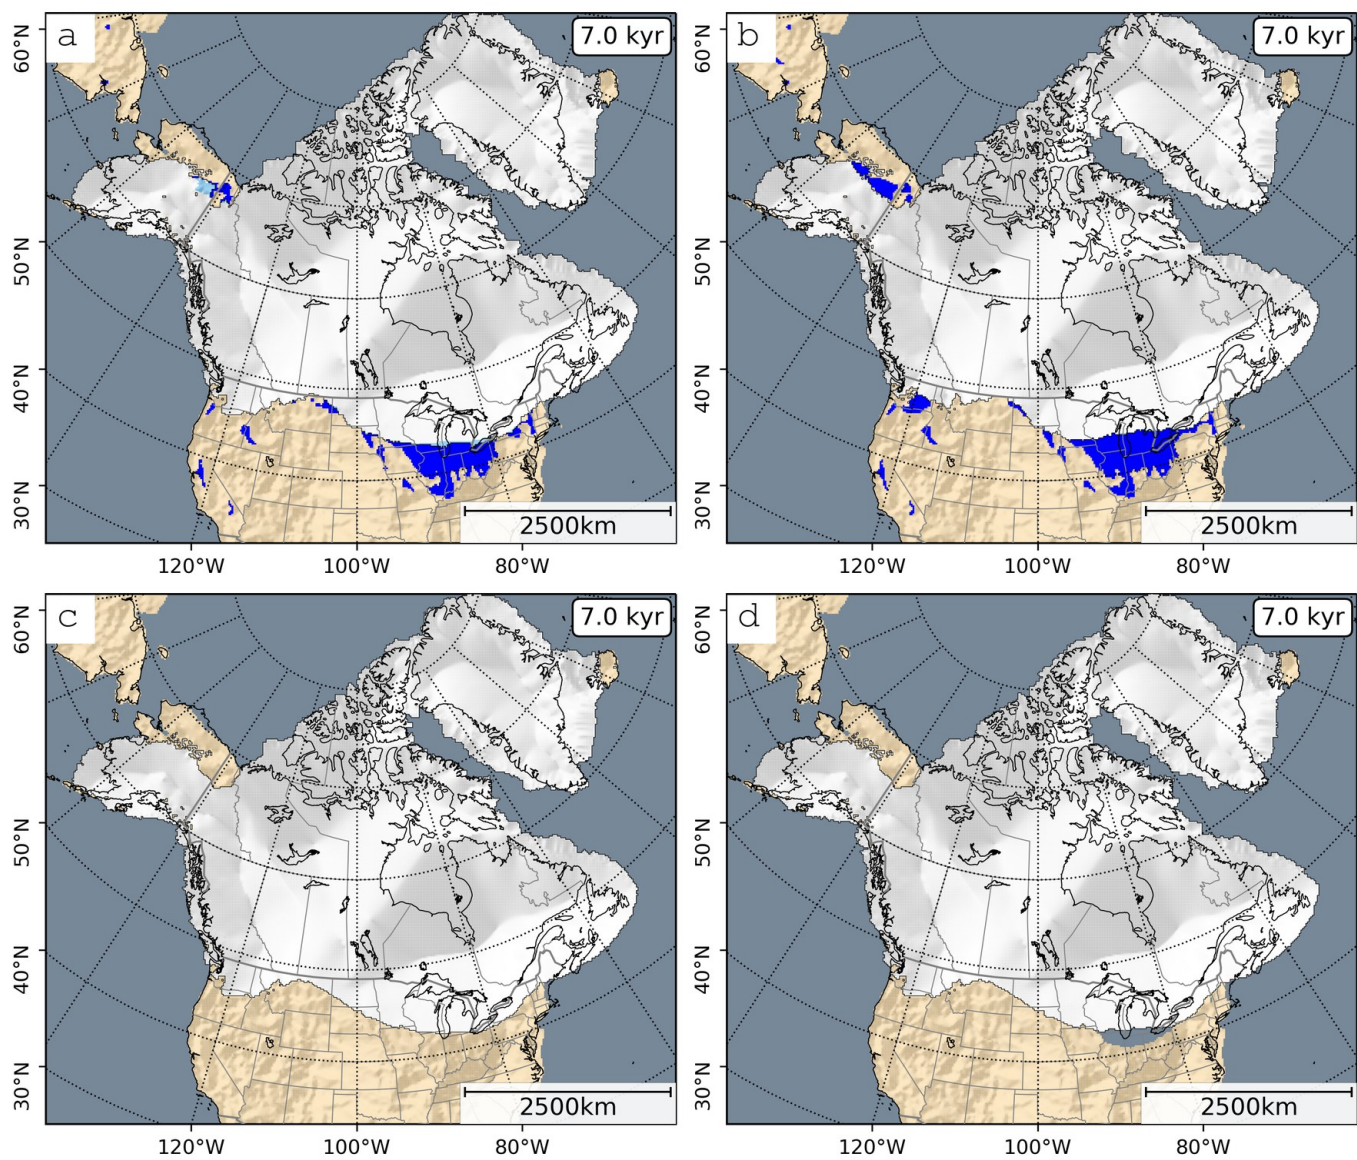

Figure S14: Overview map at 7000 kyr for the different experiments: a) LCC, b) LNS, c) Ctrl and d) Def.



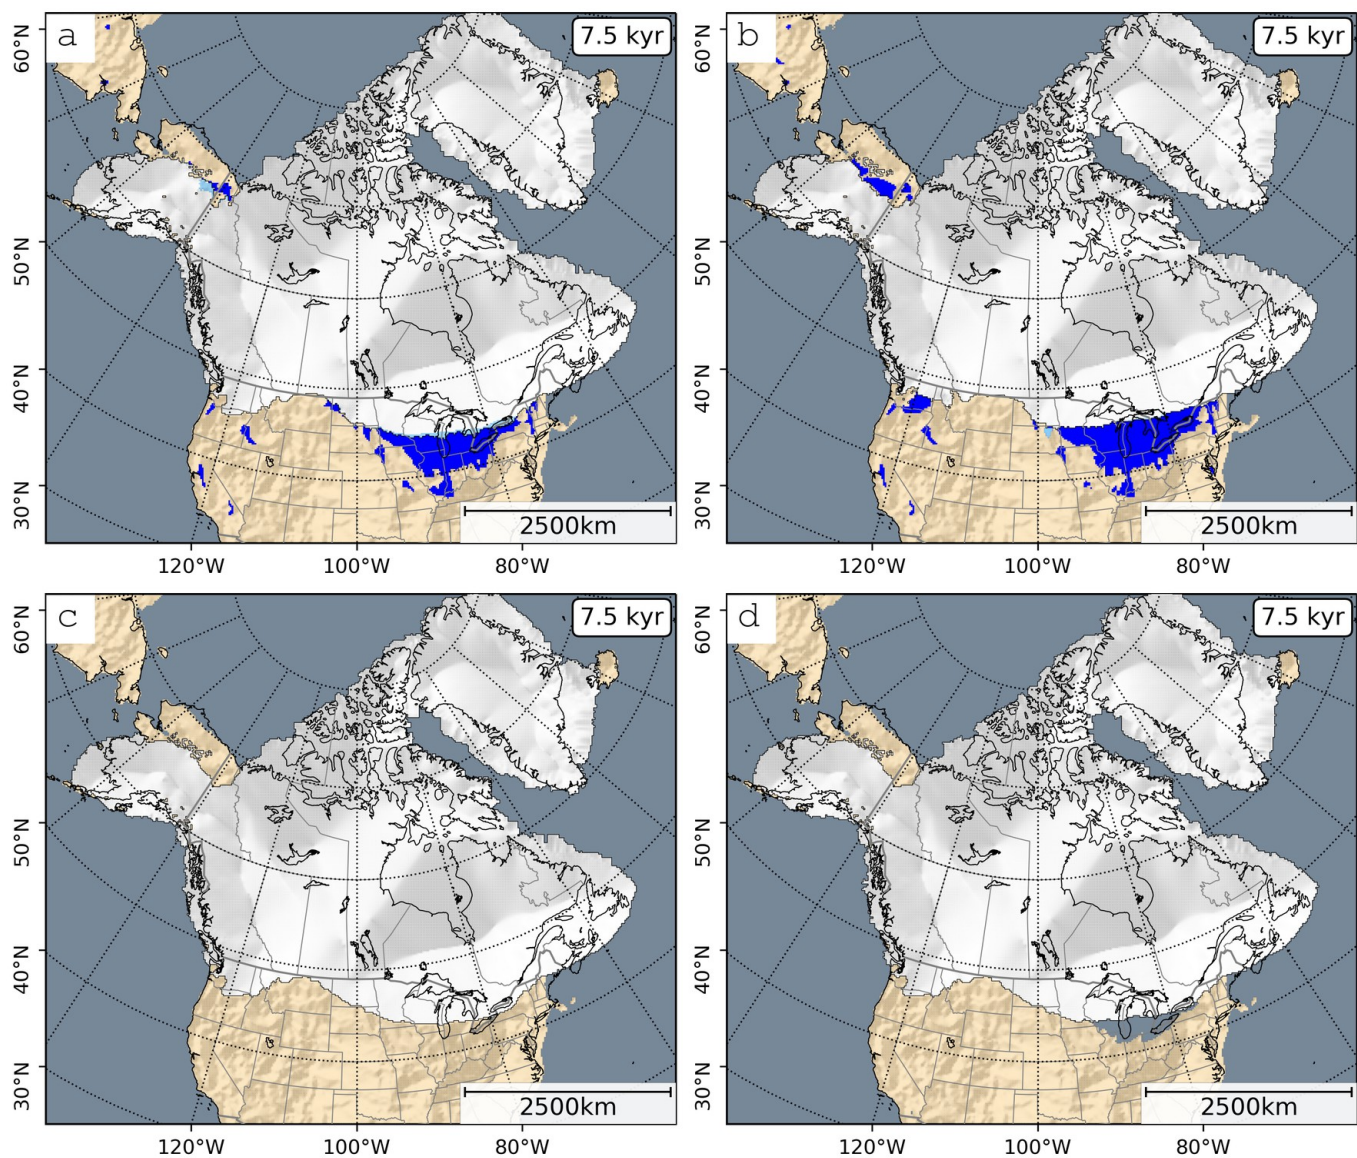

Figure S15: Overview map at 7500 kyr for the different experiments: a) LCC, b) LNS, c) Ctrl and d) Def.

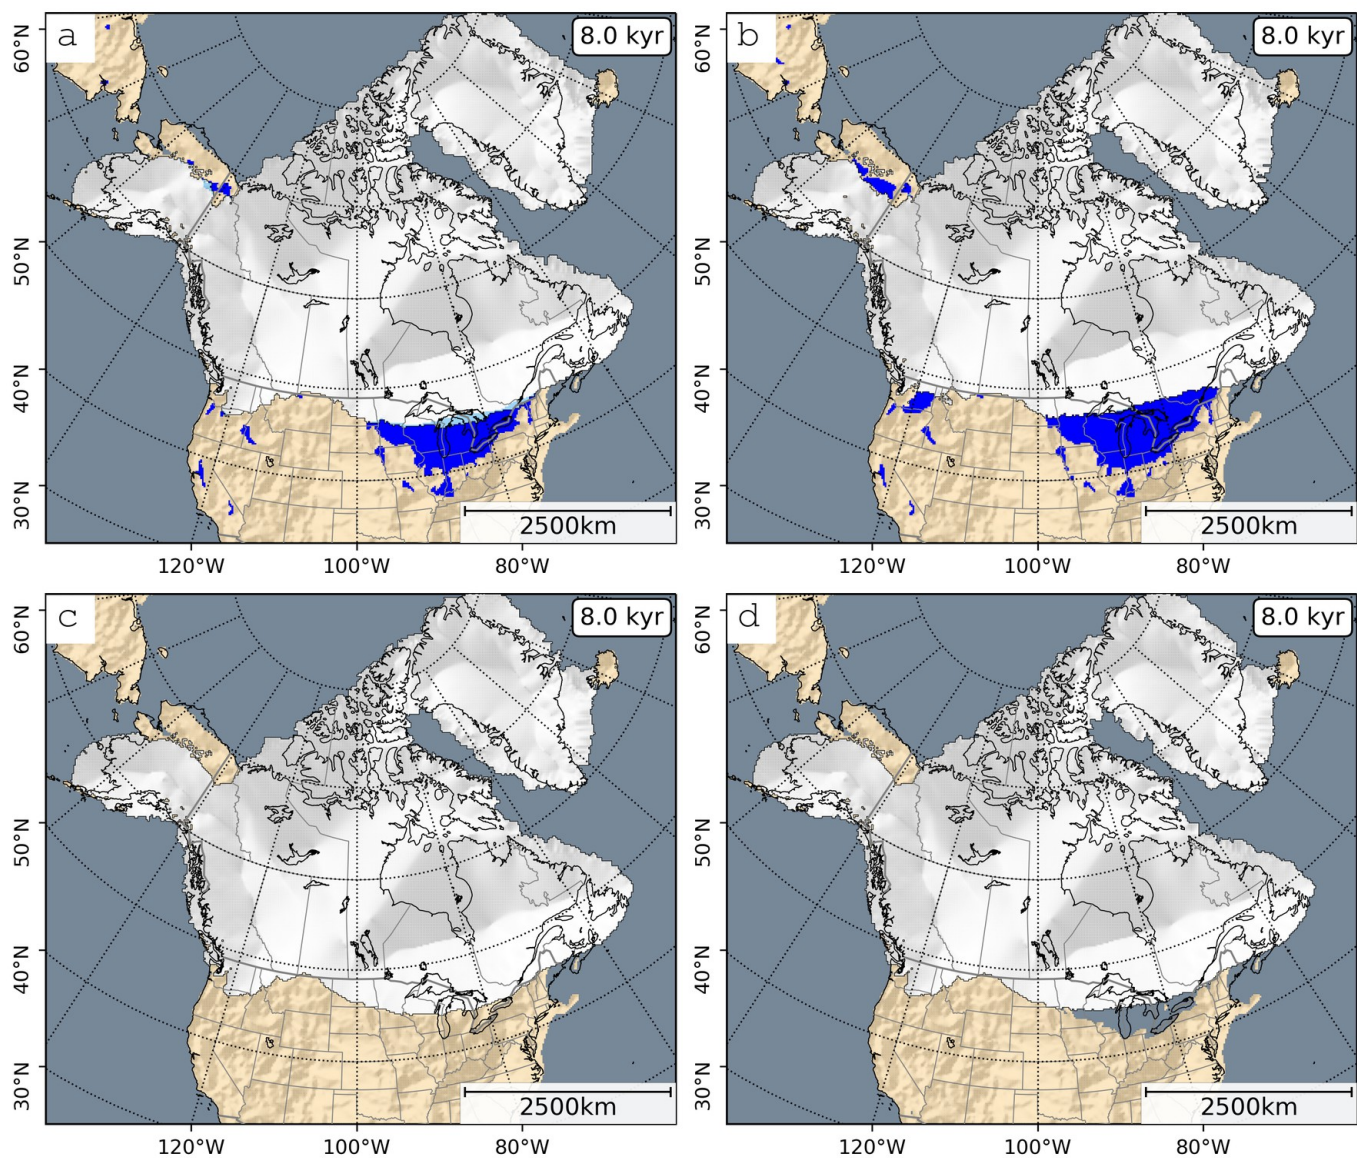

Figure S16: Overview map at 8000 kyr for the different experiments: a) LCC, b) LNS, c) Ctrl and d) Def.



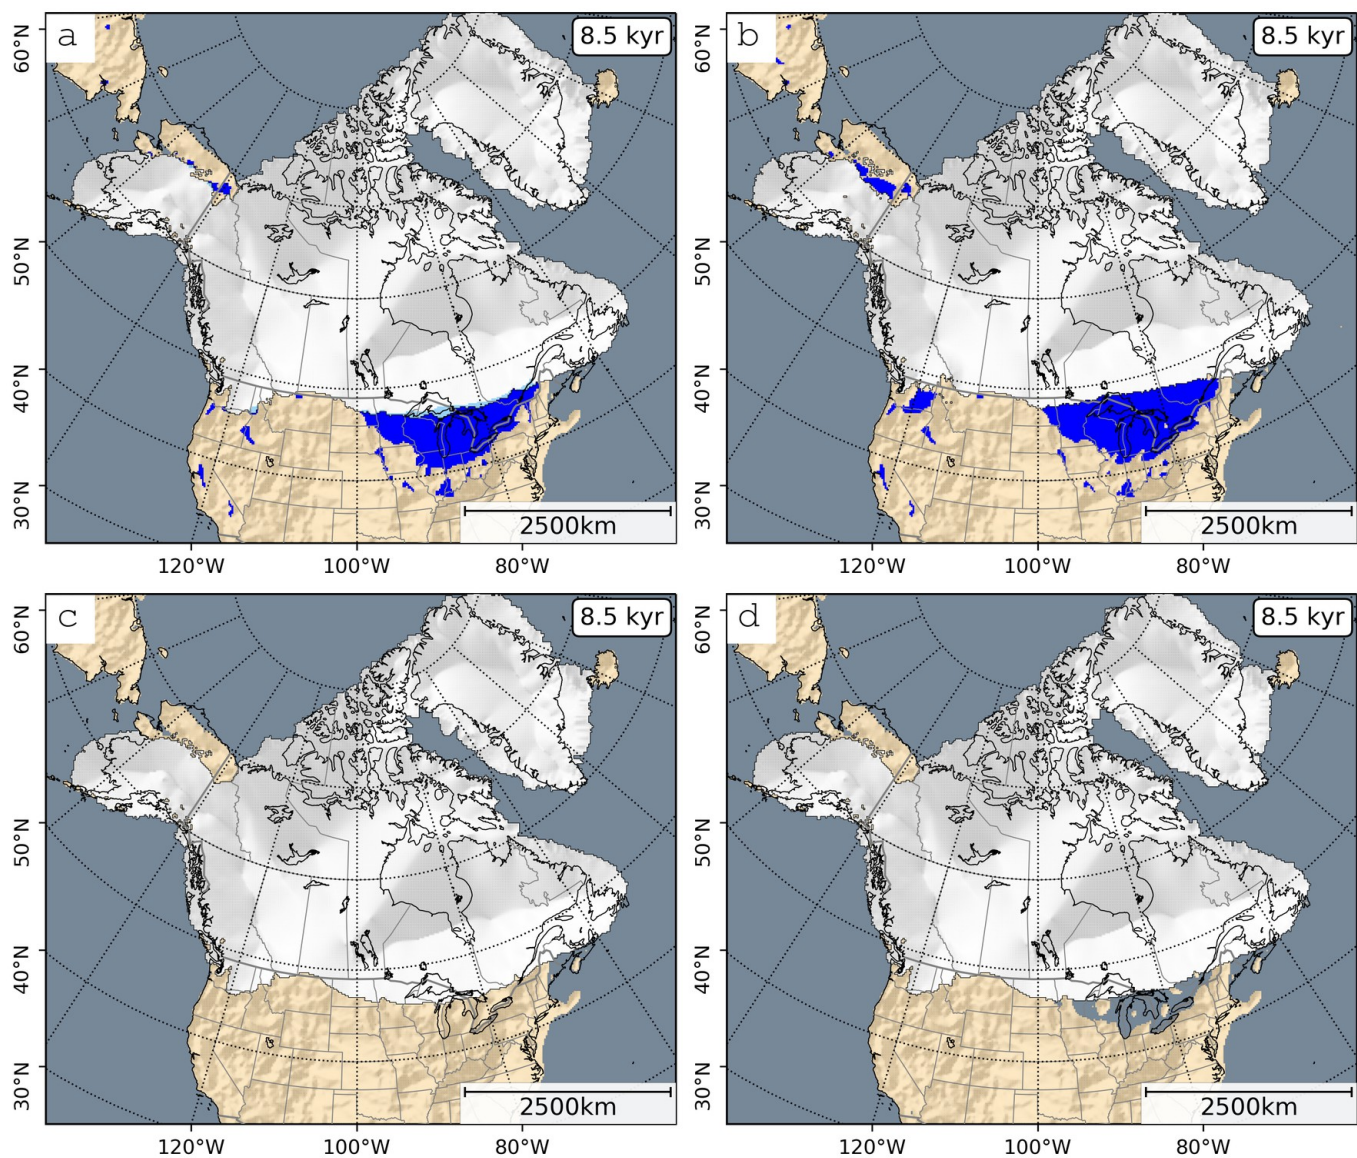

Figure S17: Overview map at 8500 kyr for the different experiments: a) LCC, b) LNS, c) Ctrl and d) Def.

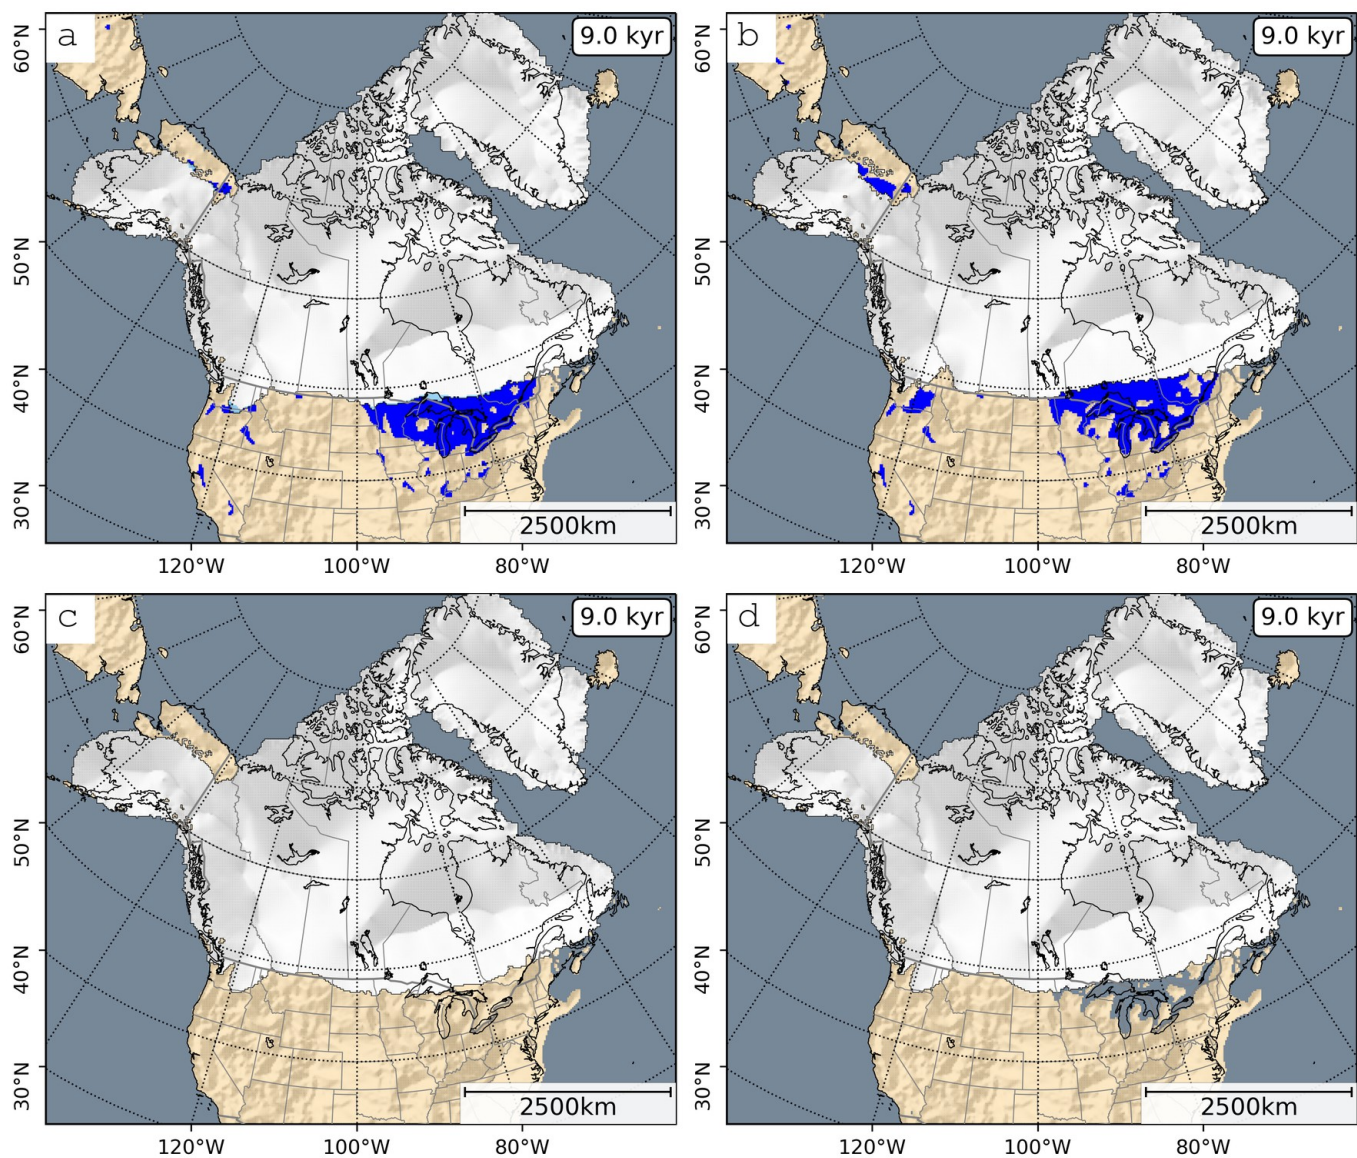

Figure S18: Overview map at 9000 kyr for the different experiments: a) LCC, b) LNS, c) Ctrl and d) Def.



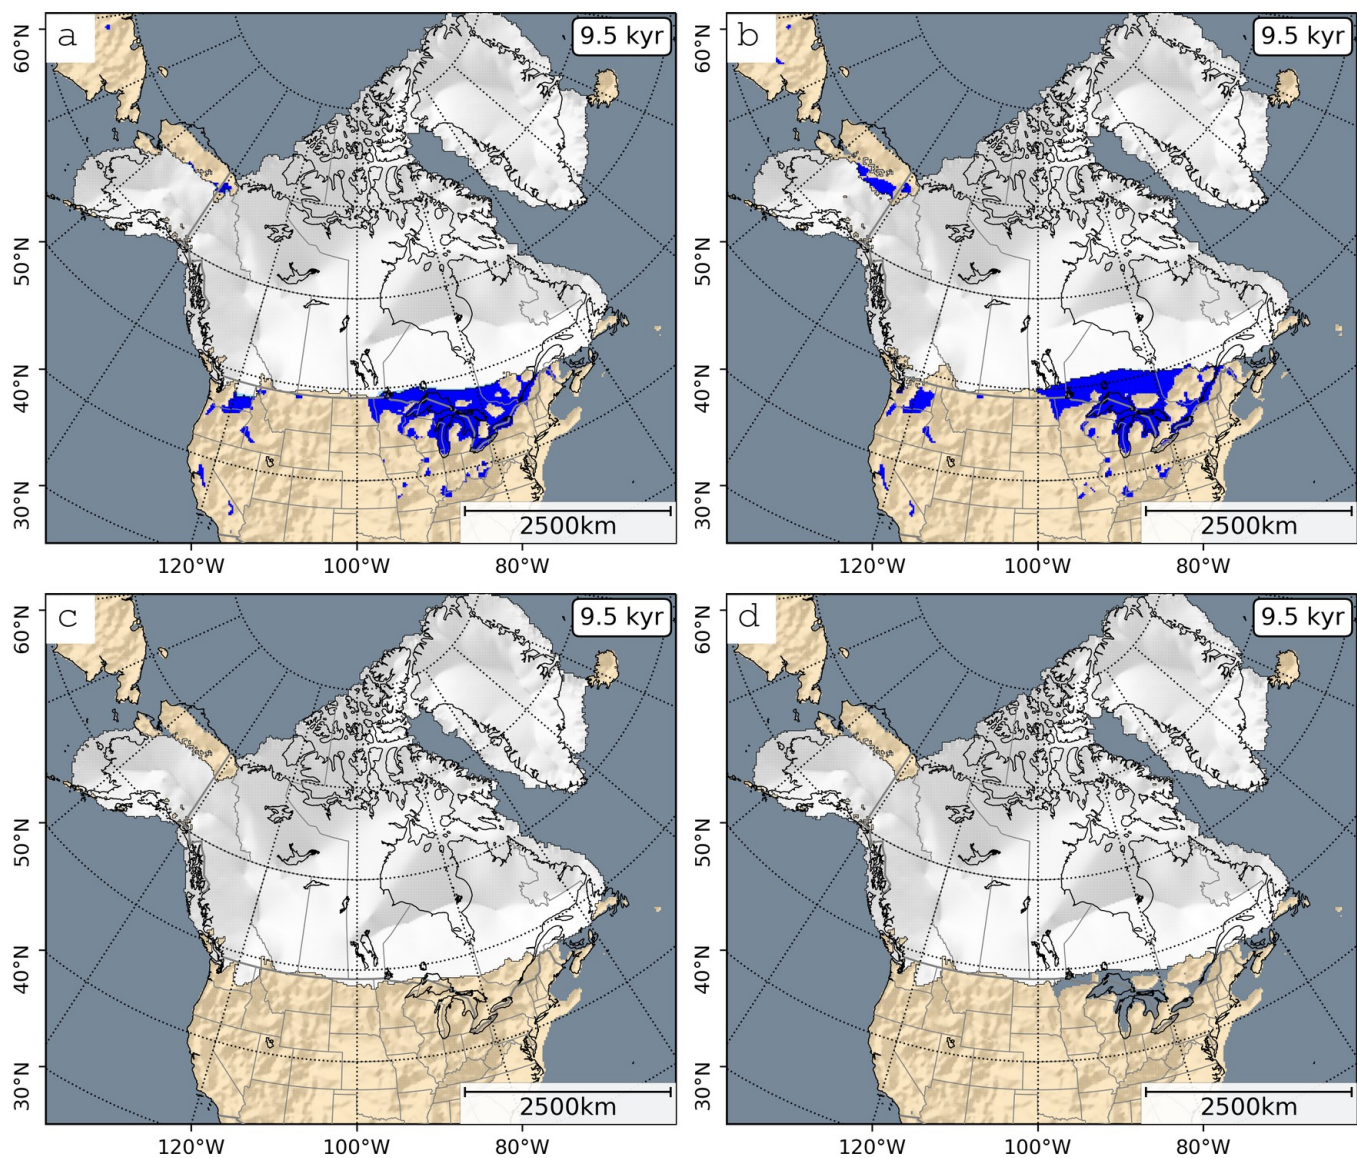

Figure S19: Overview map at 9500 kyr for the different experiments: a) LCC, b) LNS, c) Ctrl and d) Def.

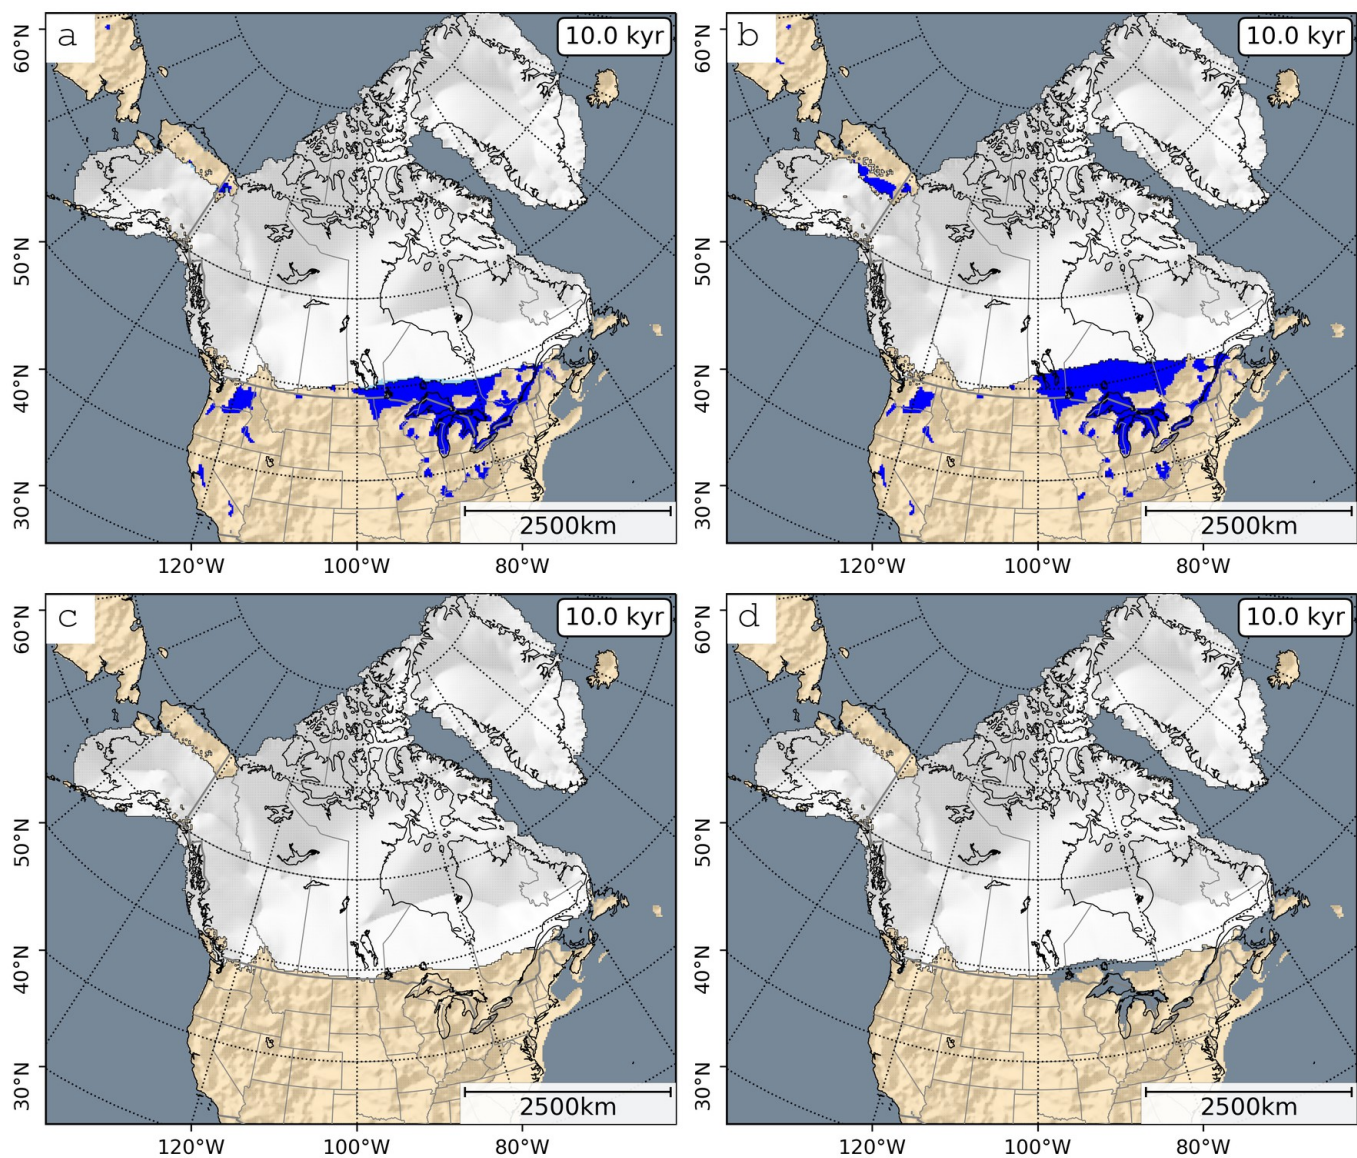

Figure S20: Overview map at 10000 kyr for the different experiments: a) LCC, b) LNS, c) Ctrl and d) Def.



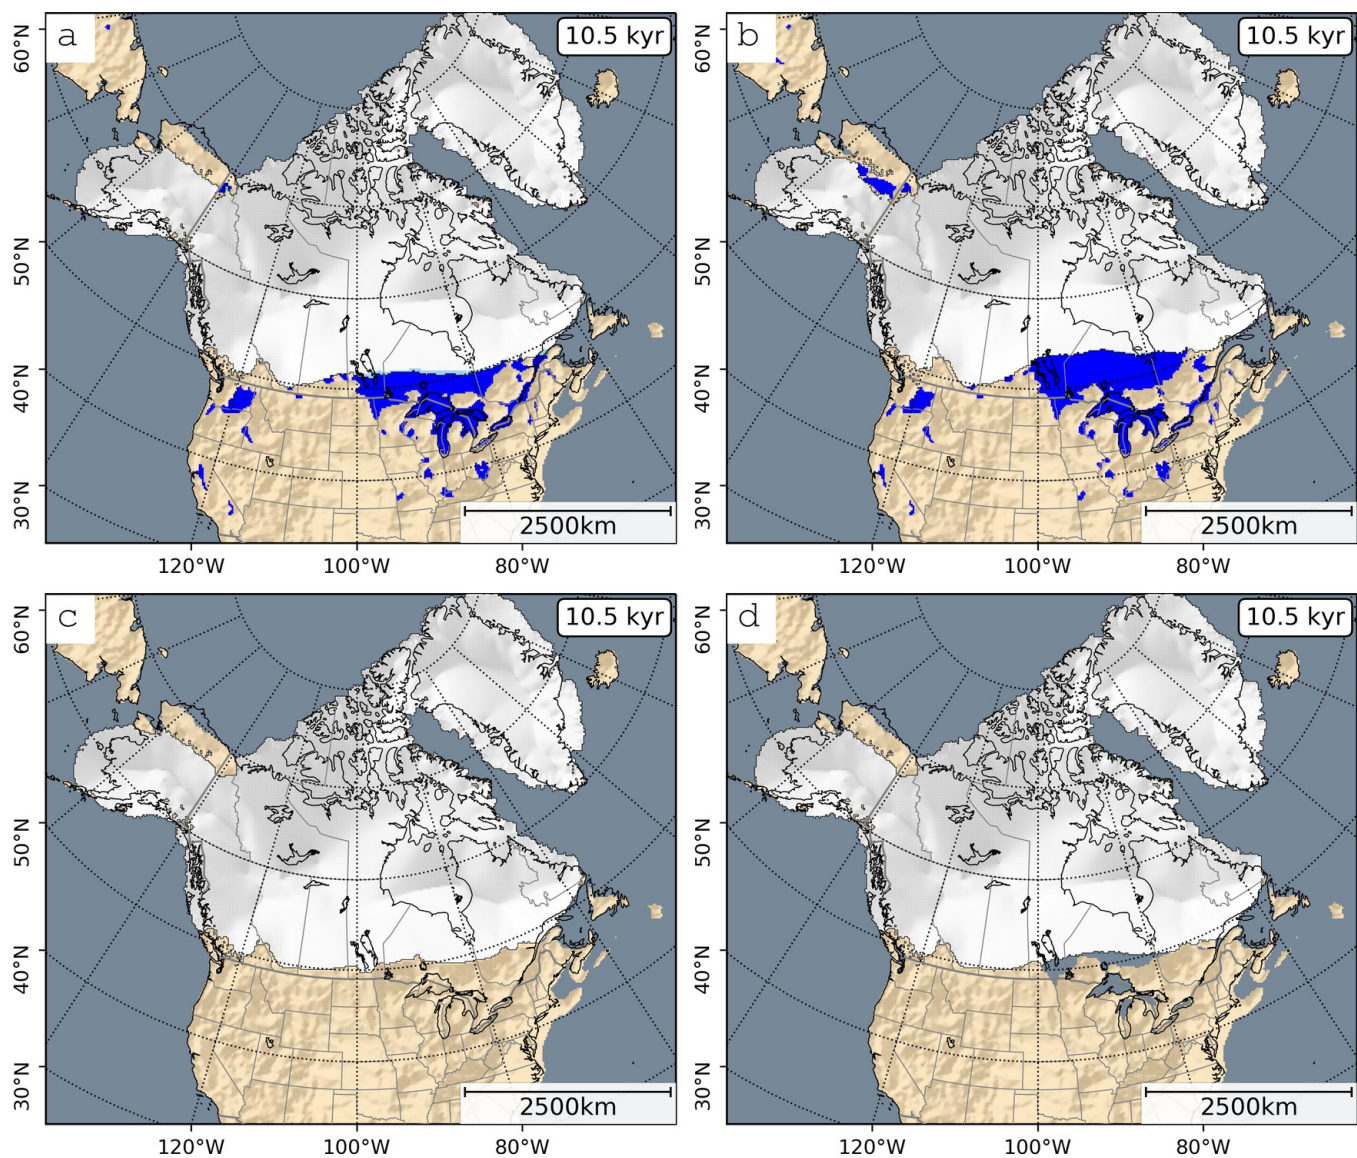

Figure S21: Overview map at 10500 kyr for the different experiments: a) LCC, b) LNS, c) Ctrl and d) Def.

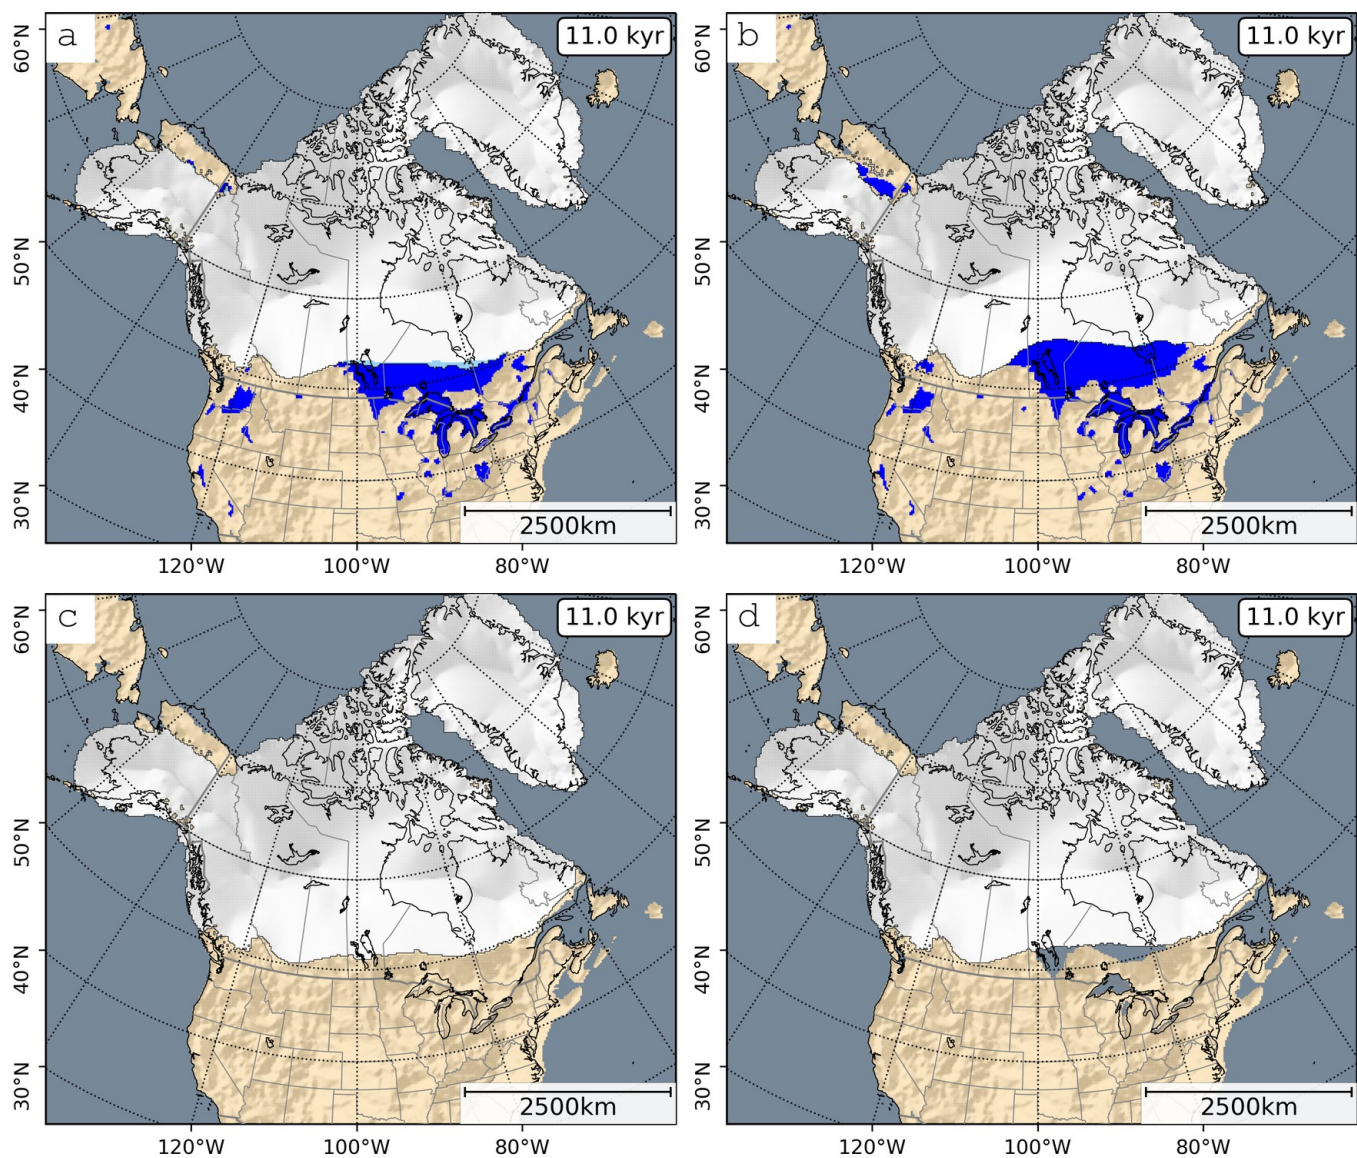

Figure S22: Overview map at 11000 kyr for the different experiments: a) LCC, b) LNS, c) Ctrl and d) Def.



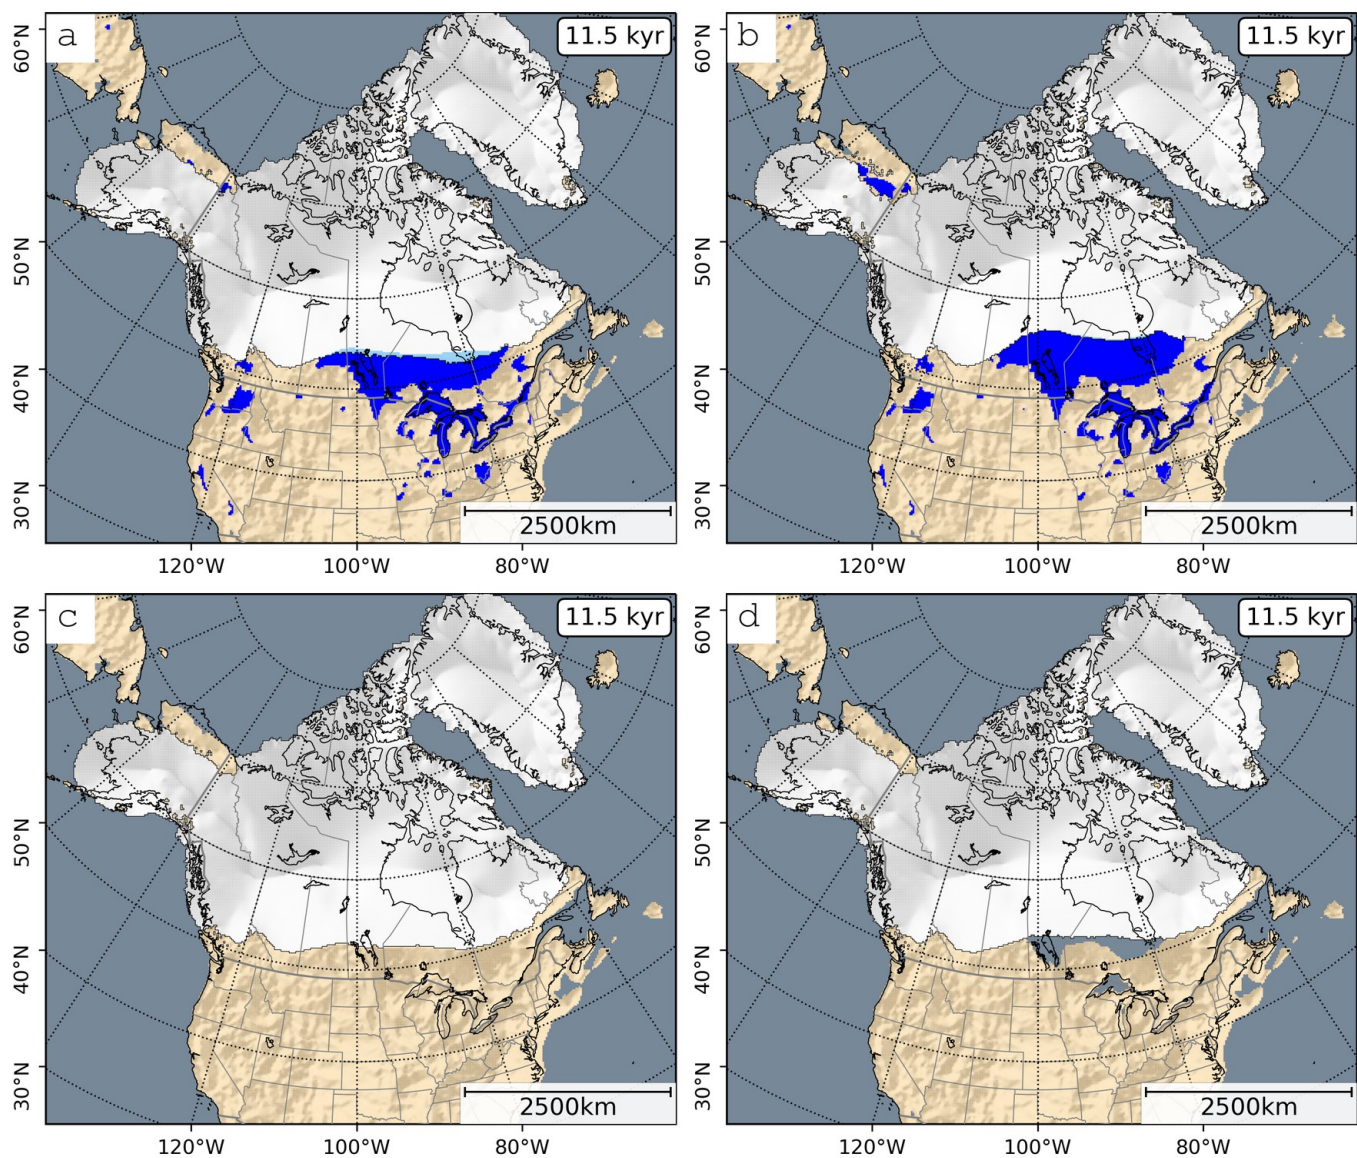

Figure S23: Overview map at 11500 kyr for the different experiments: a) LCC, b) LNS, c) Ctrl and d) Def.

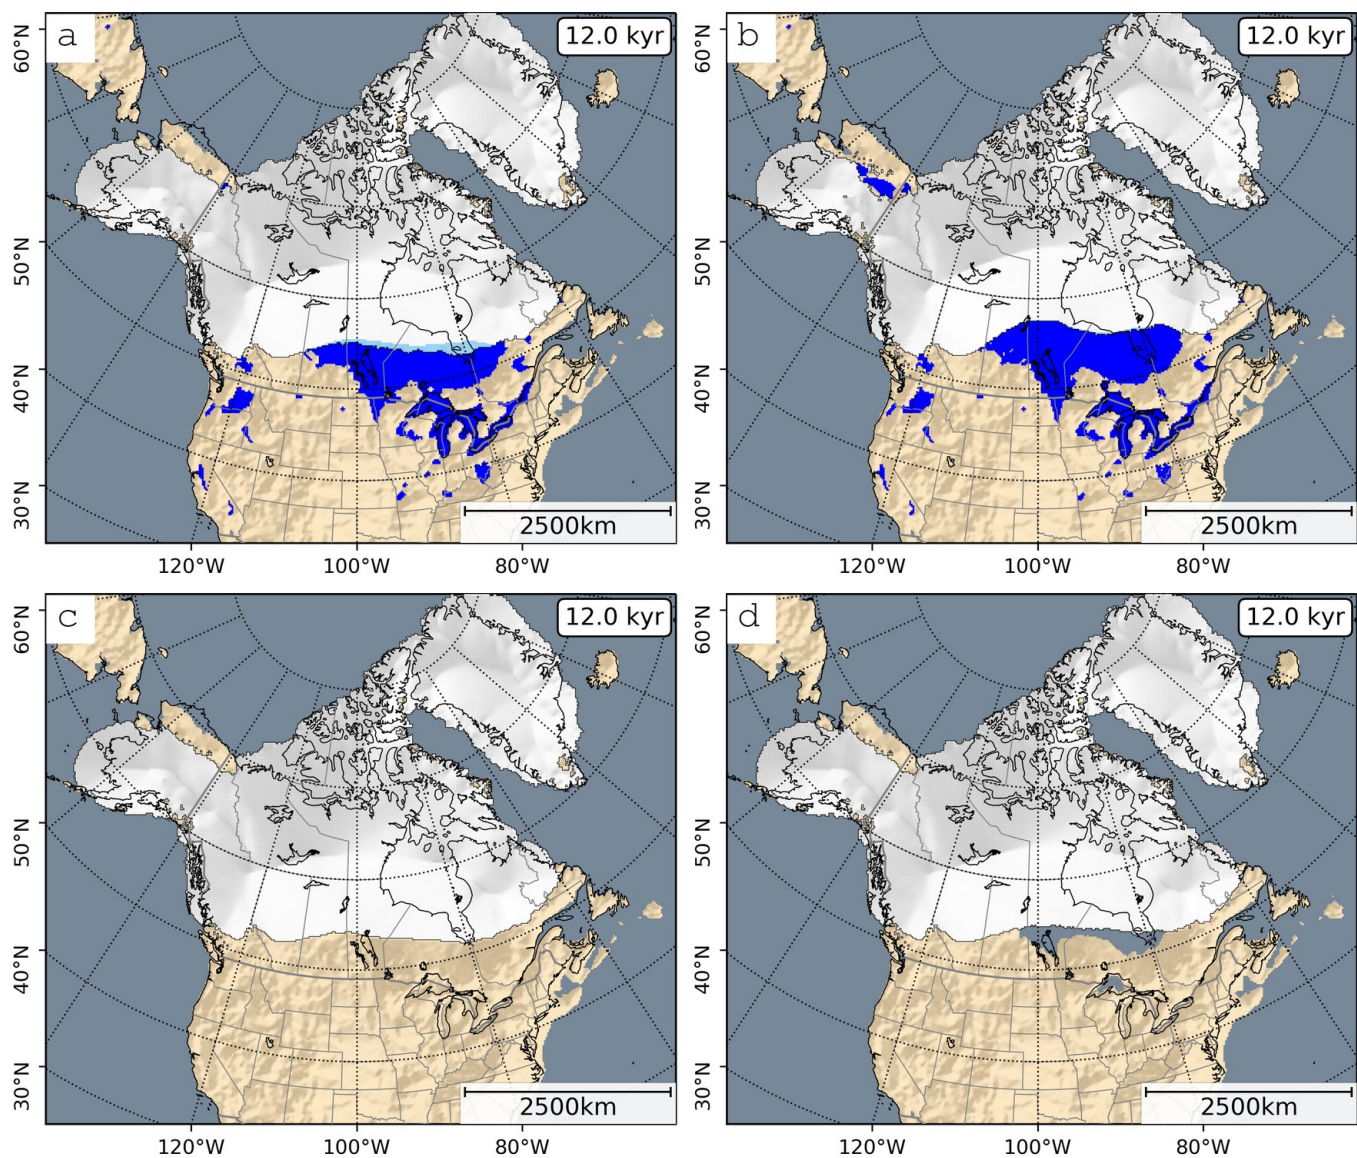

Figure S24: Overview map at 12000 kyr for the different experiments: a) LCC, b) LNS, c) Ctrl and d) Def.



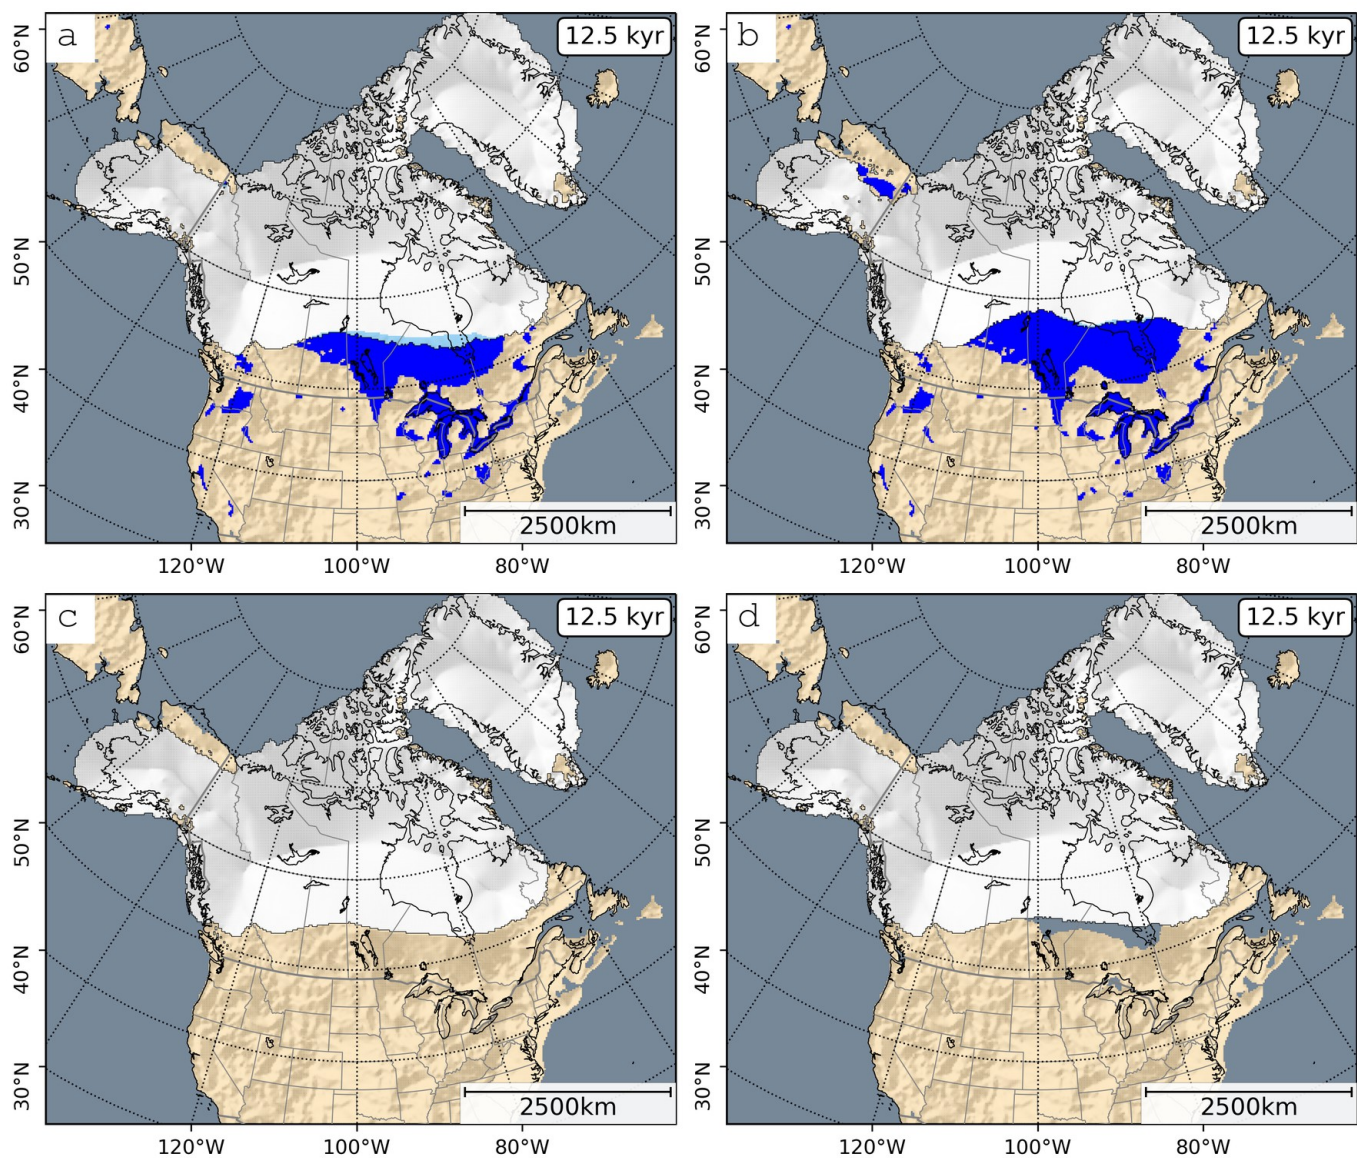

Figure S25: Overview map at 12500 kyr for the different experiments: a) LCC, b) LNS, c) Ctrl and d) Def.

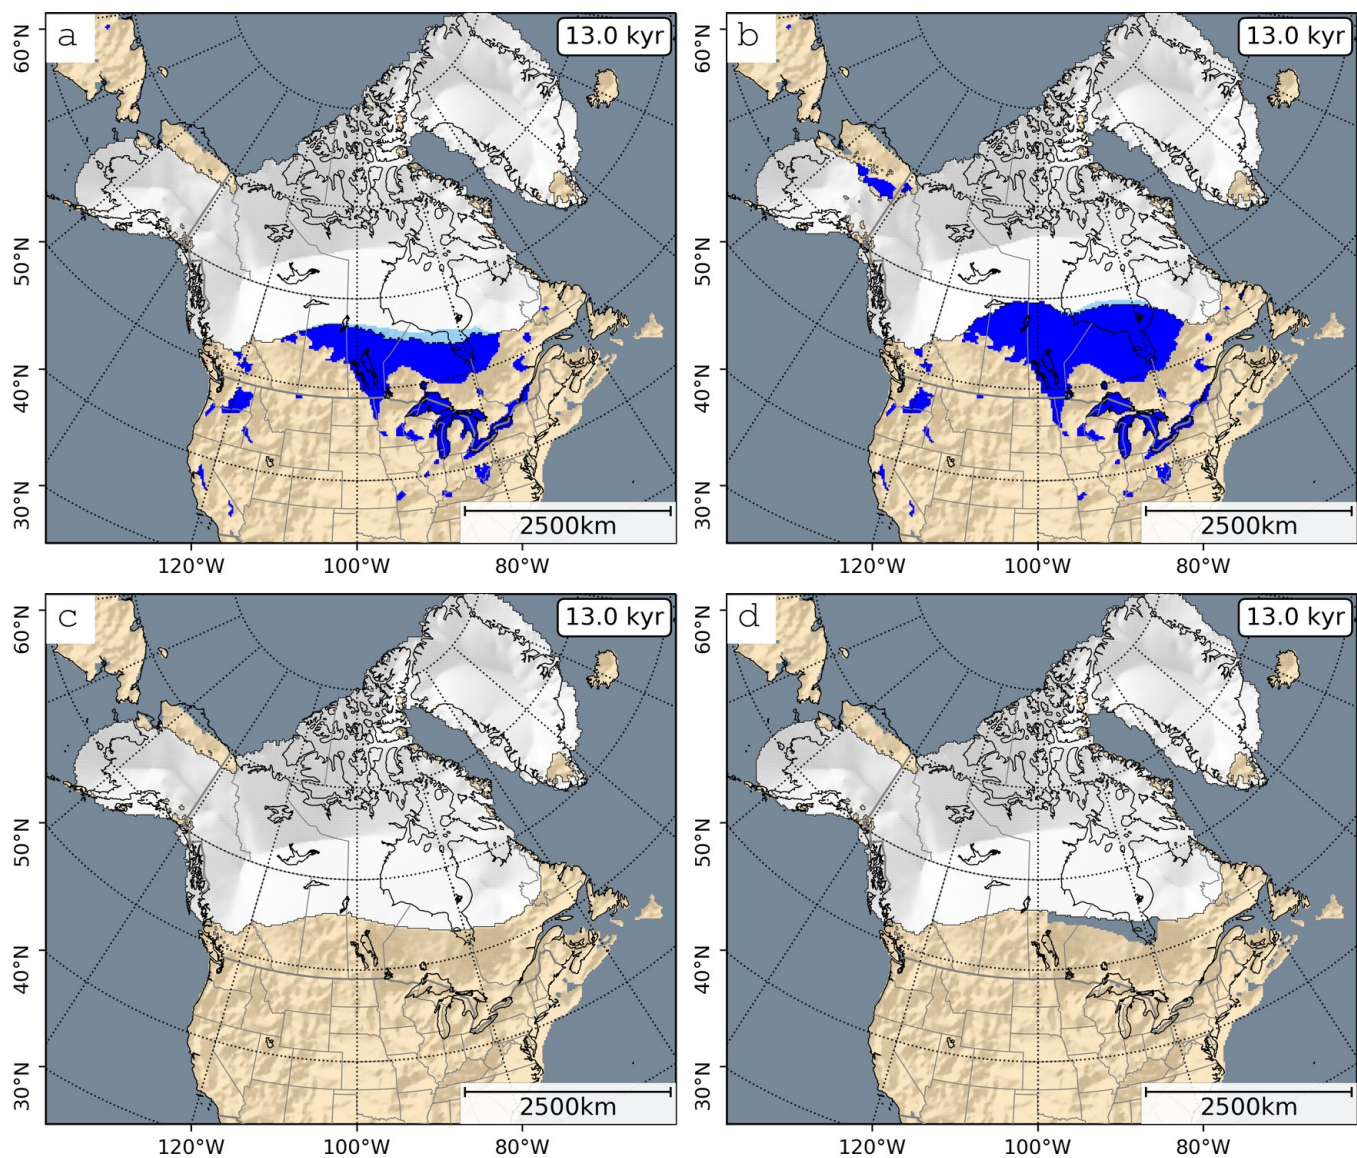

Figure S26: Overview map at 13000 kyr for the different experiments: a) LCC, b) LNS, c) Ctrl and d) Def.



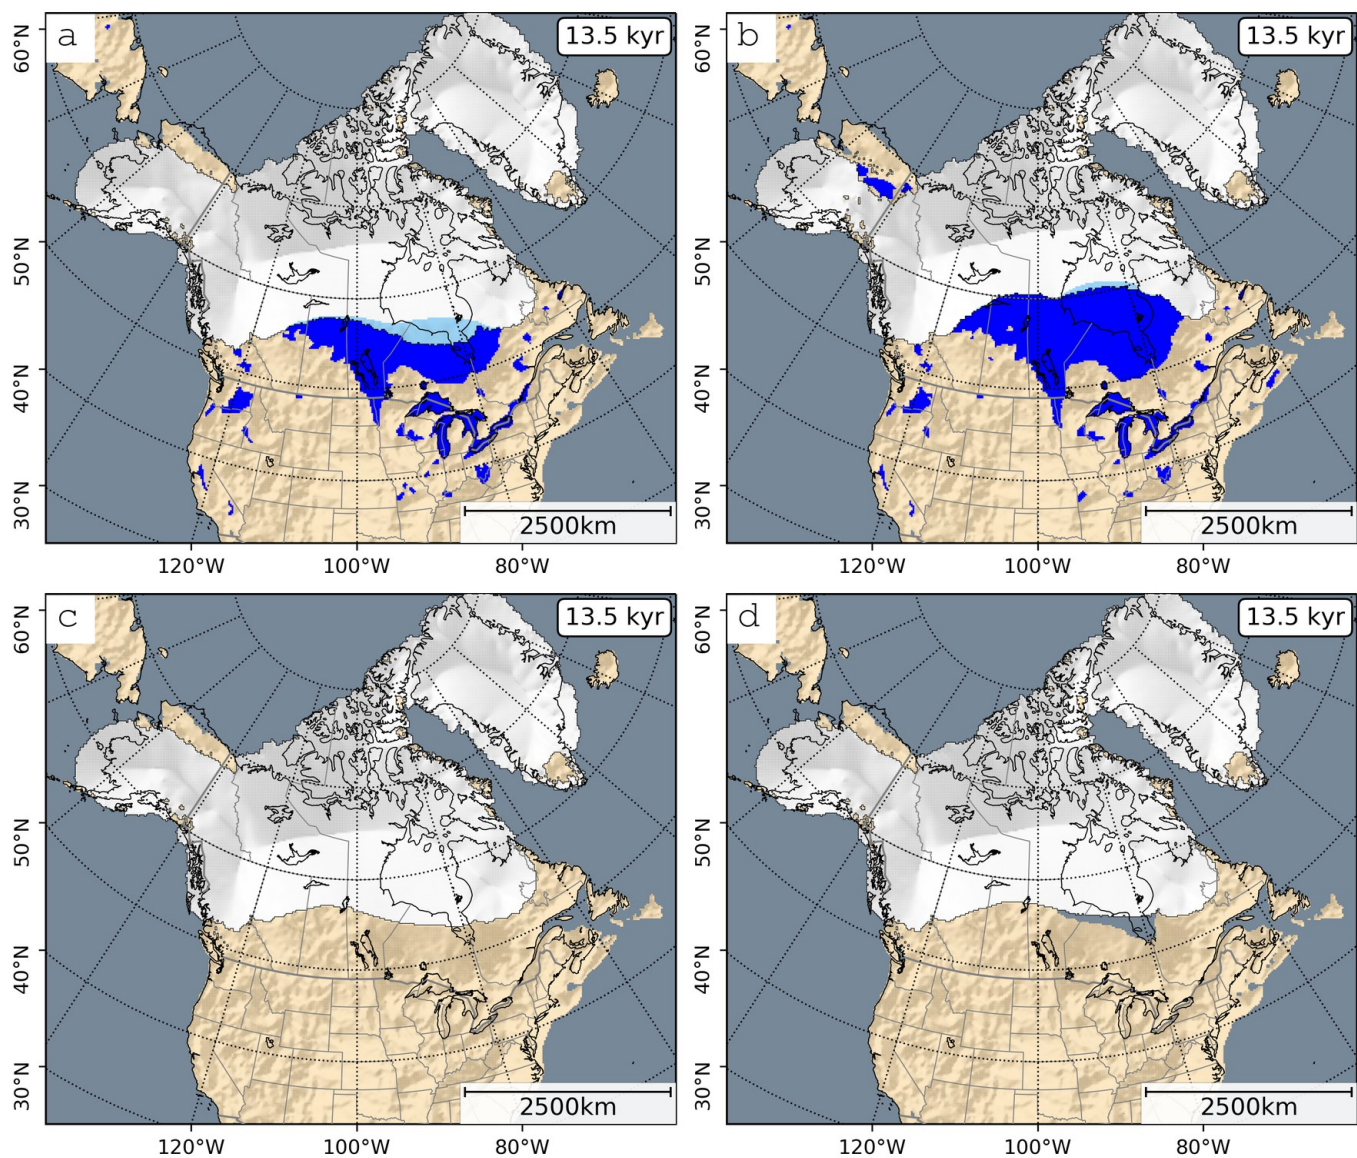

Figure S27: Overview map at 13500 kyr for the different experiments: a) LCC, b) LNS, c) Ctrl and d) Def.

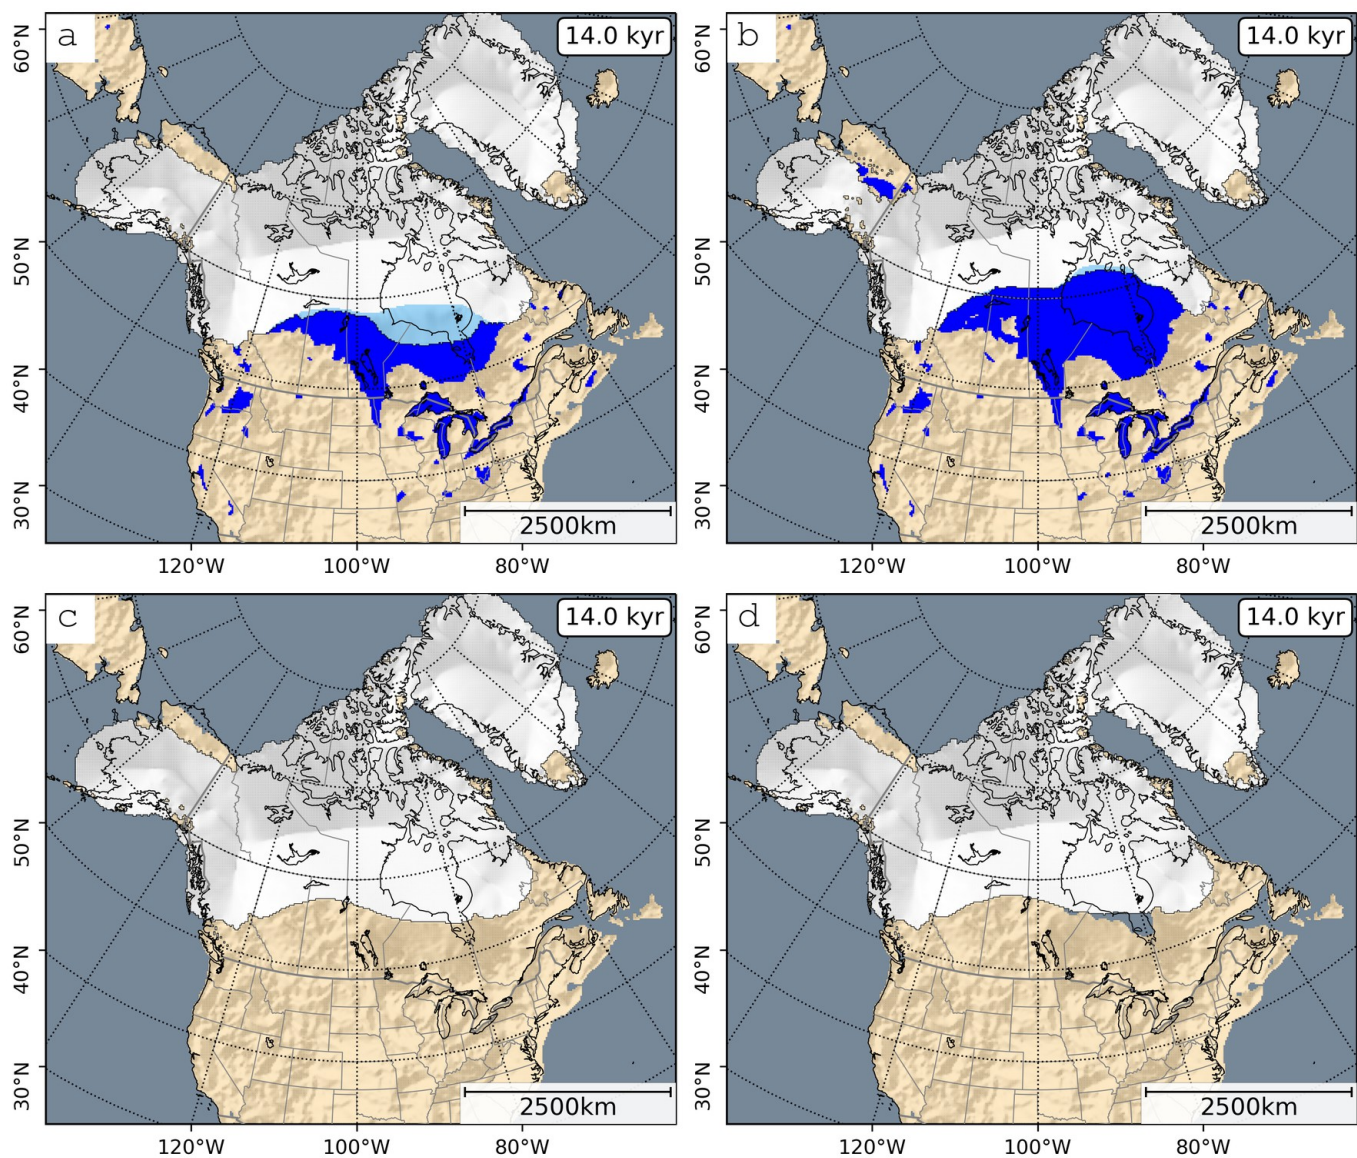

Figure S28: Overview map at 14000 kyr for the different experiments: a) LCC, b) LNS, c) Ctrl and d) Def.



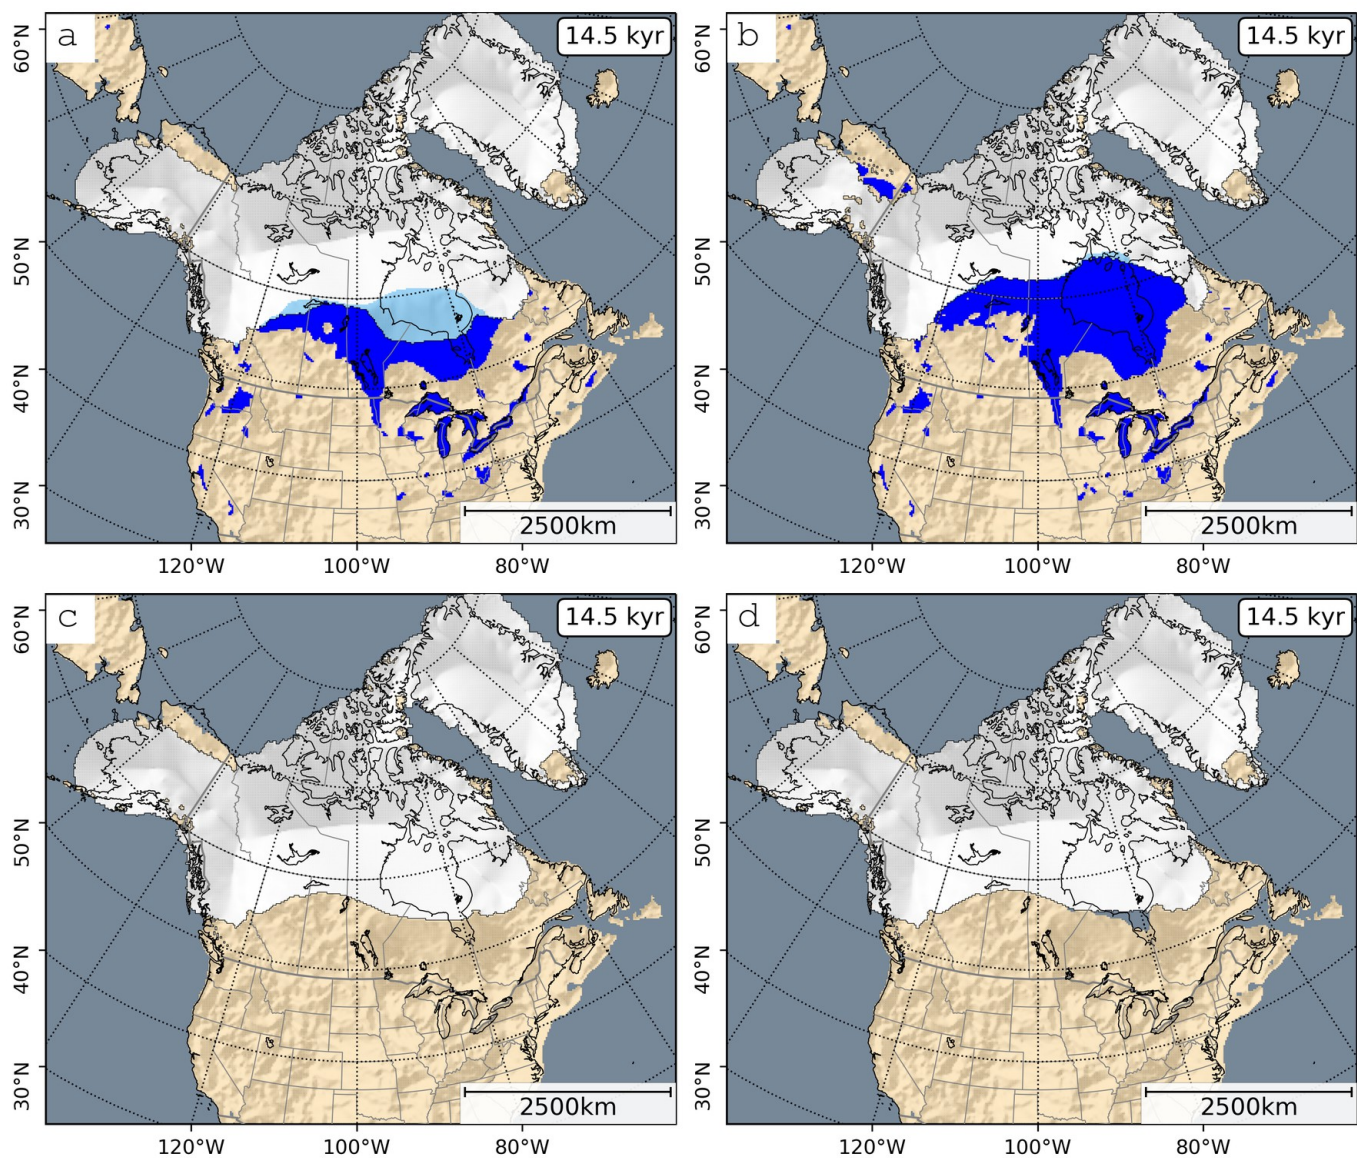

Figure S29: Overview map at 14500 kyr for the different experiments: a) LCC, b) LNS, c) Ctrl and d) Def.

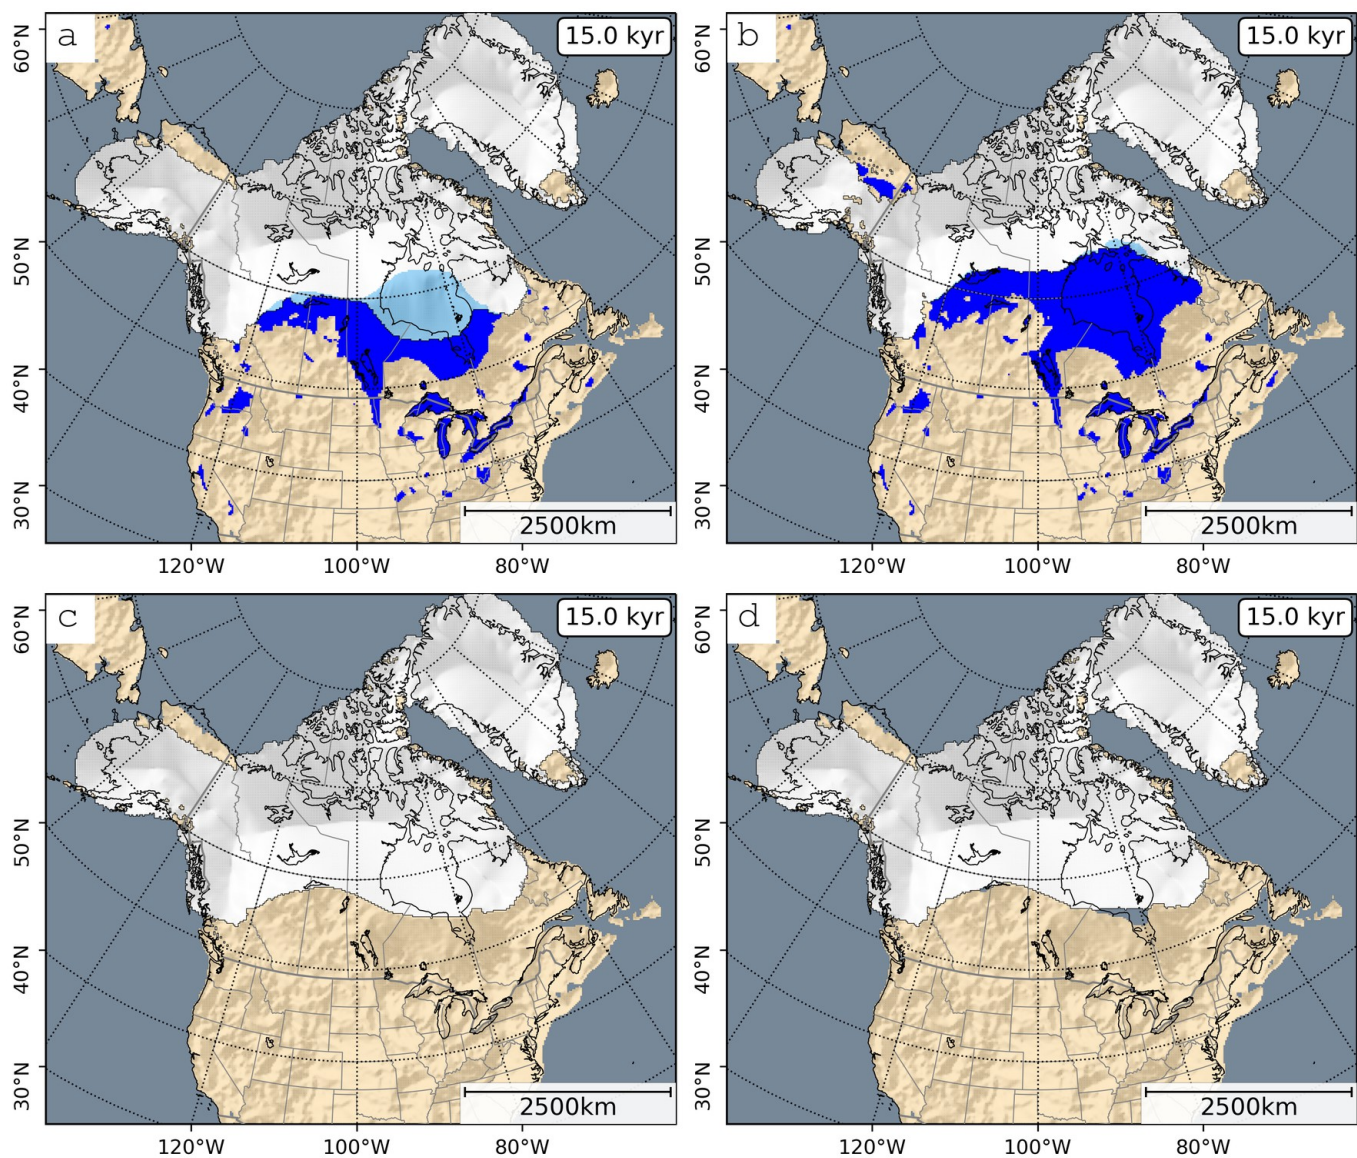

Figure S30: Overview map at 15000 kyr for the different experiments: a) LCC, b) LNS, c) Ctrl and d) Def.



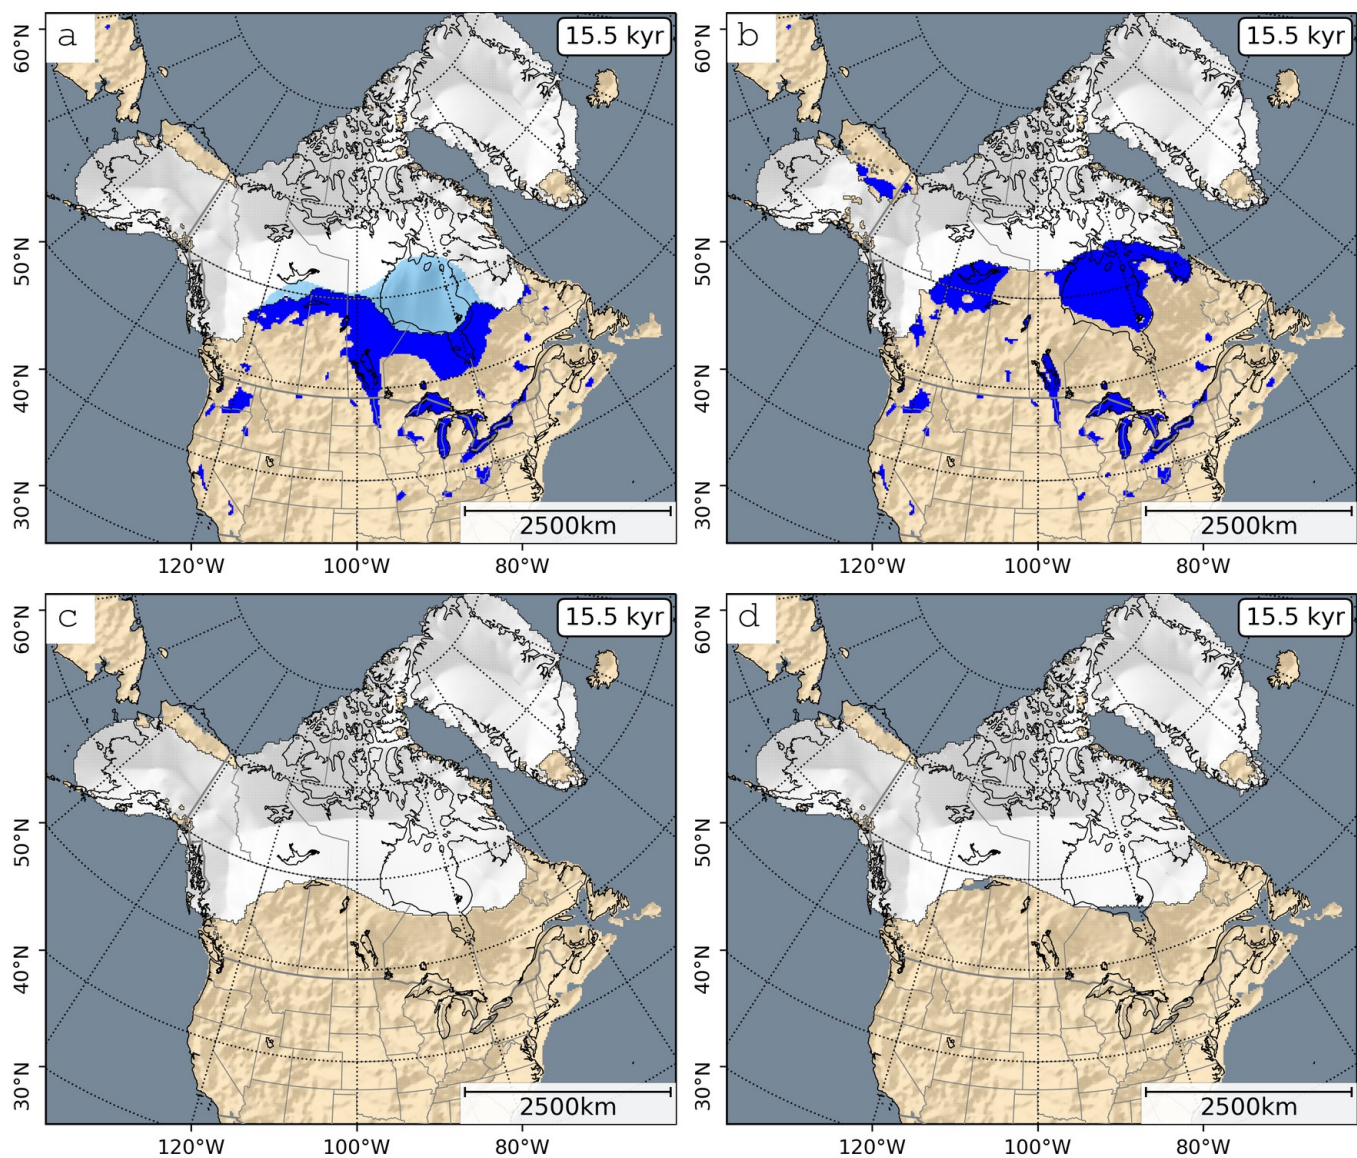

Figure S31: Overview map at 15500 kyr for the different experiments: a) LCC, b) LNS, c) Ctrl and d) Def.

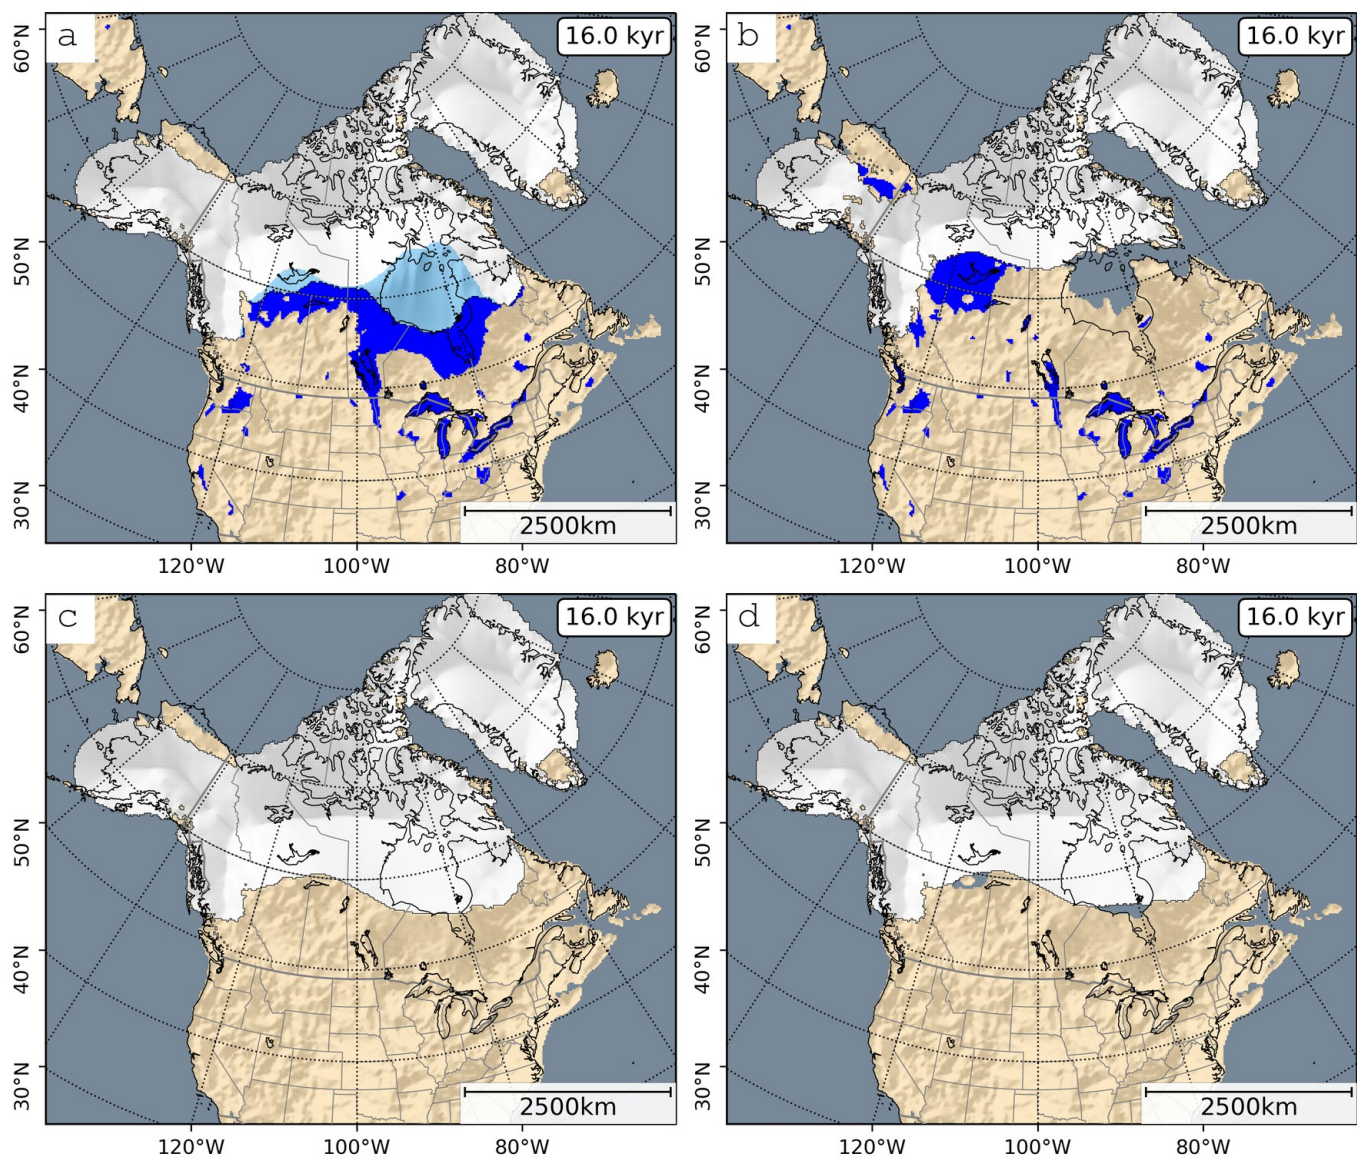

Figure S32: Overview map at 16000 kyr for the different experiments: a) LCC, b) LNS, c) Ctrl and d) Def.



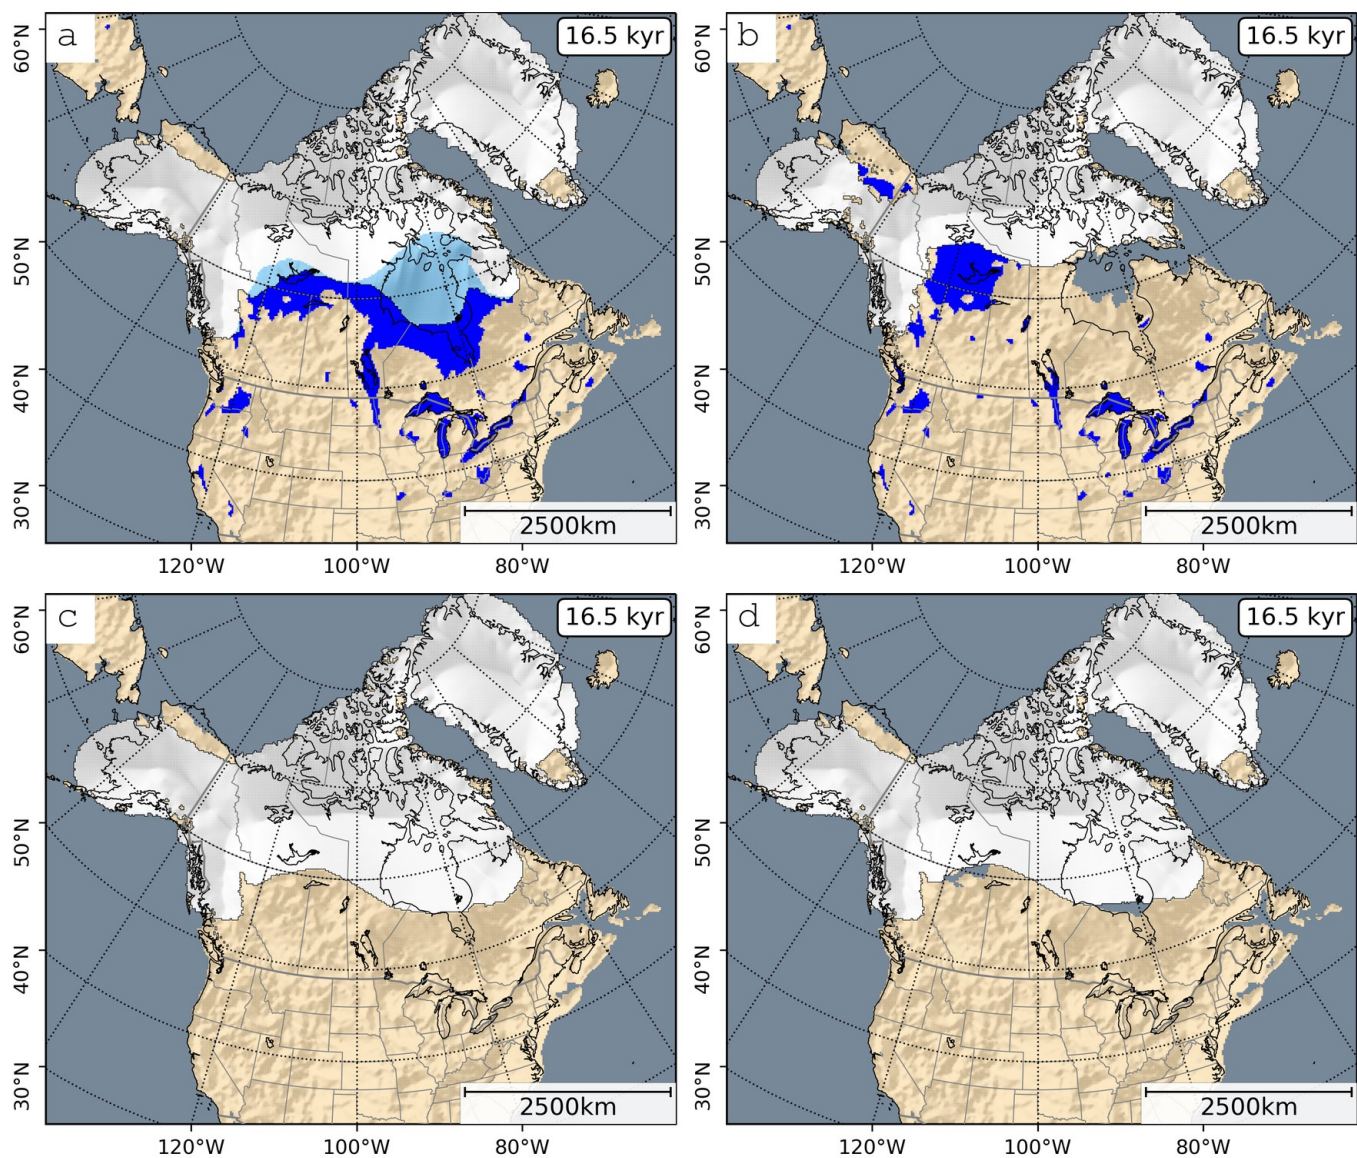

Figure S33: Overview map at 16500 kyr for the different experiments: a) LCC, b) LNS, c) Ctrl and d) Def.

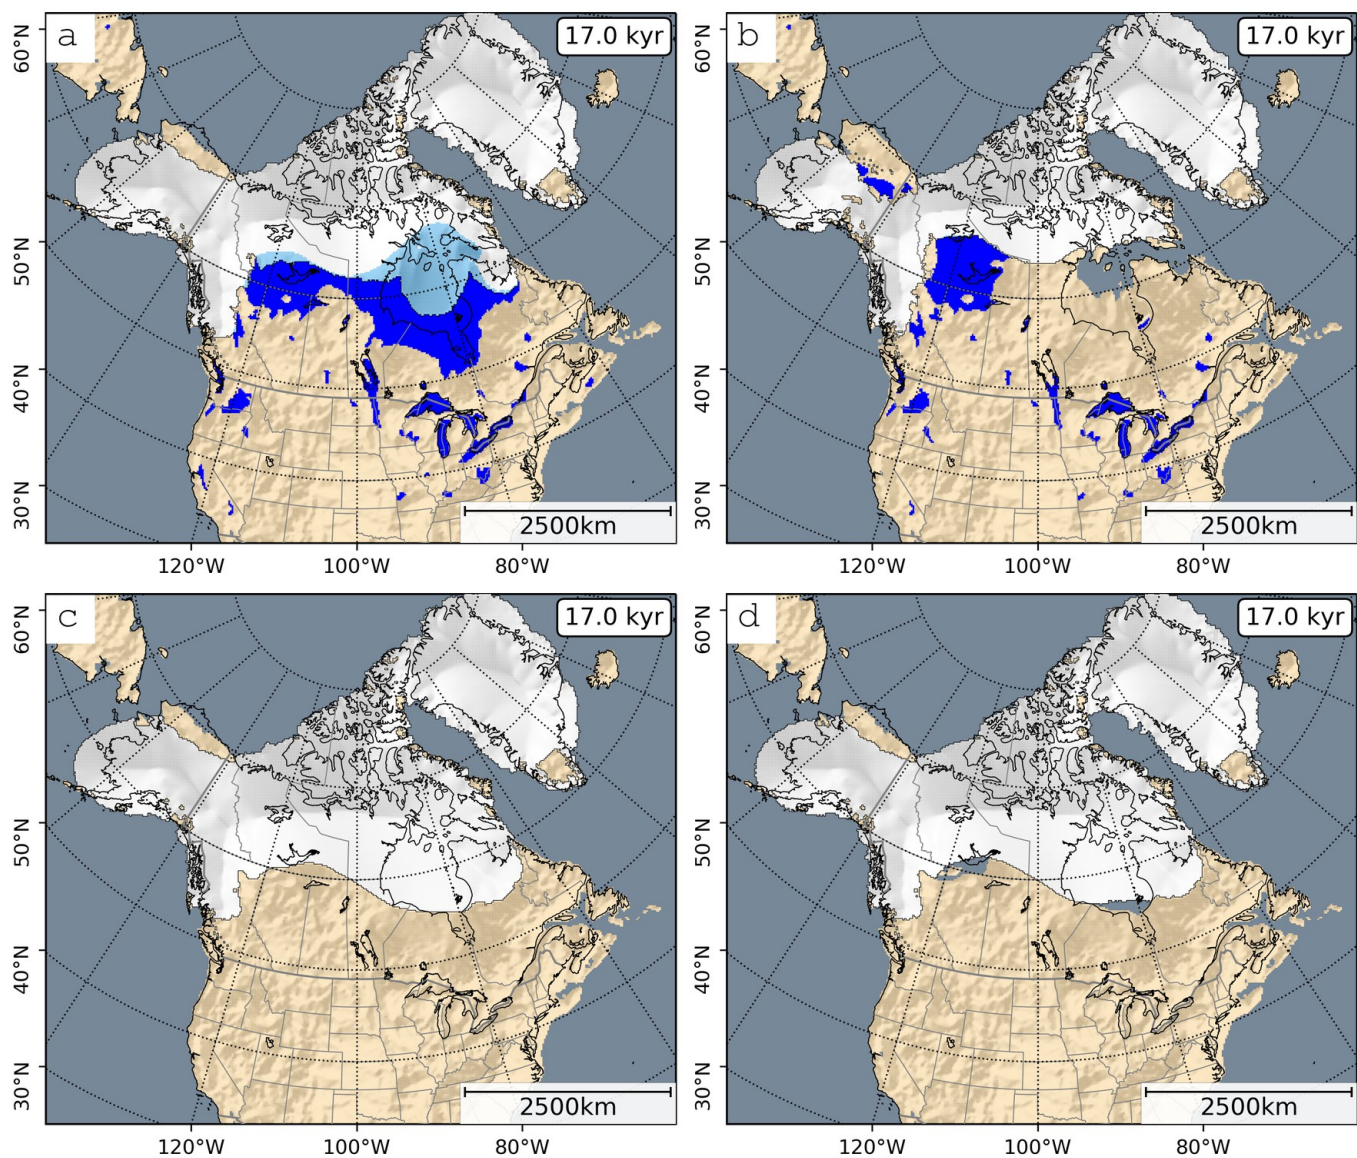

Figure S34: Overview map at 17000 kyr for the different experiments: a) LCC, b) LNS, c) Ctrl and d) Def.



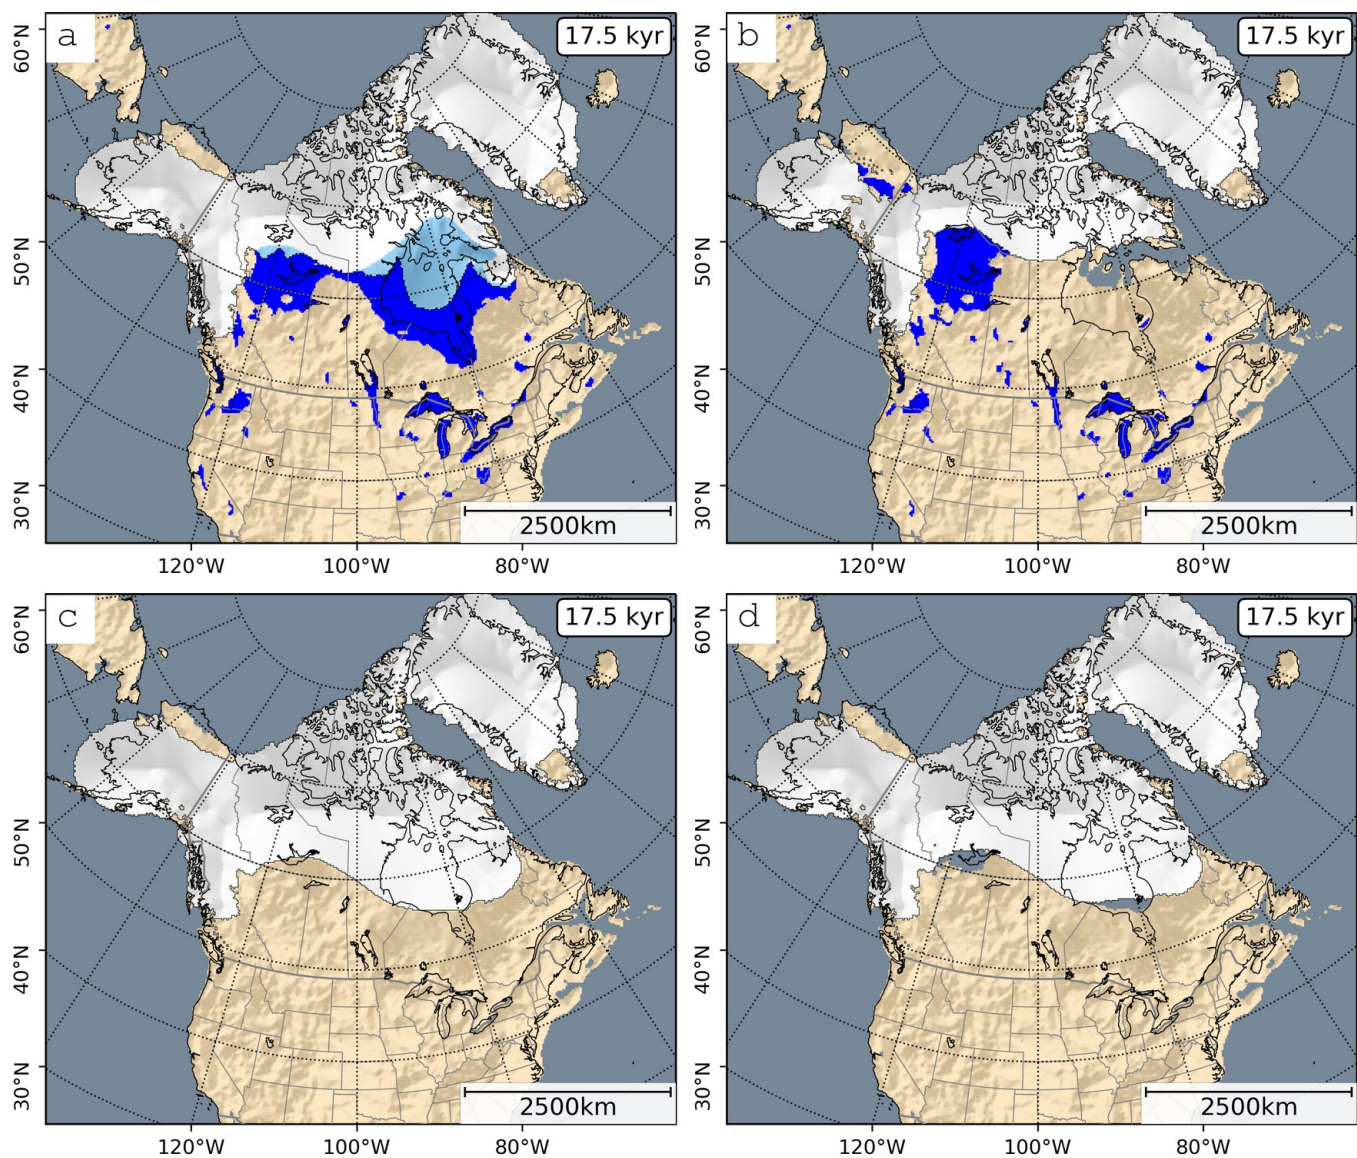

Figure S35: Overview map at 17500 kyr for the different experiments: a) LCC, b) LNS, c) Ctrl and d) Def.

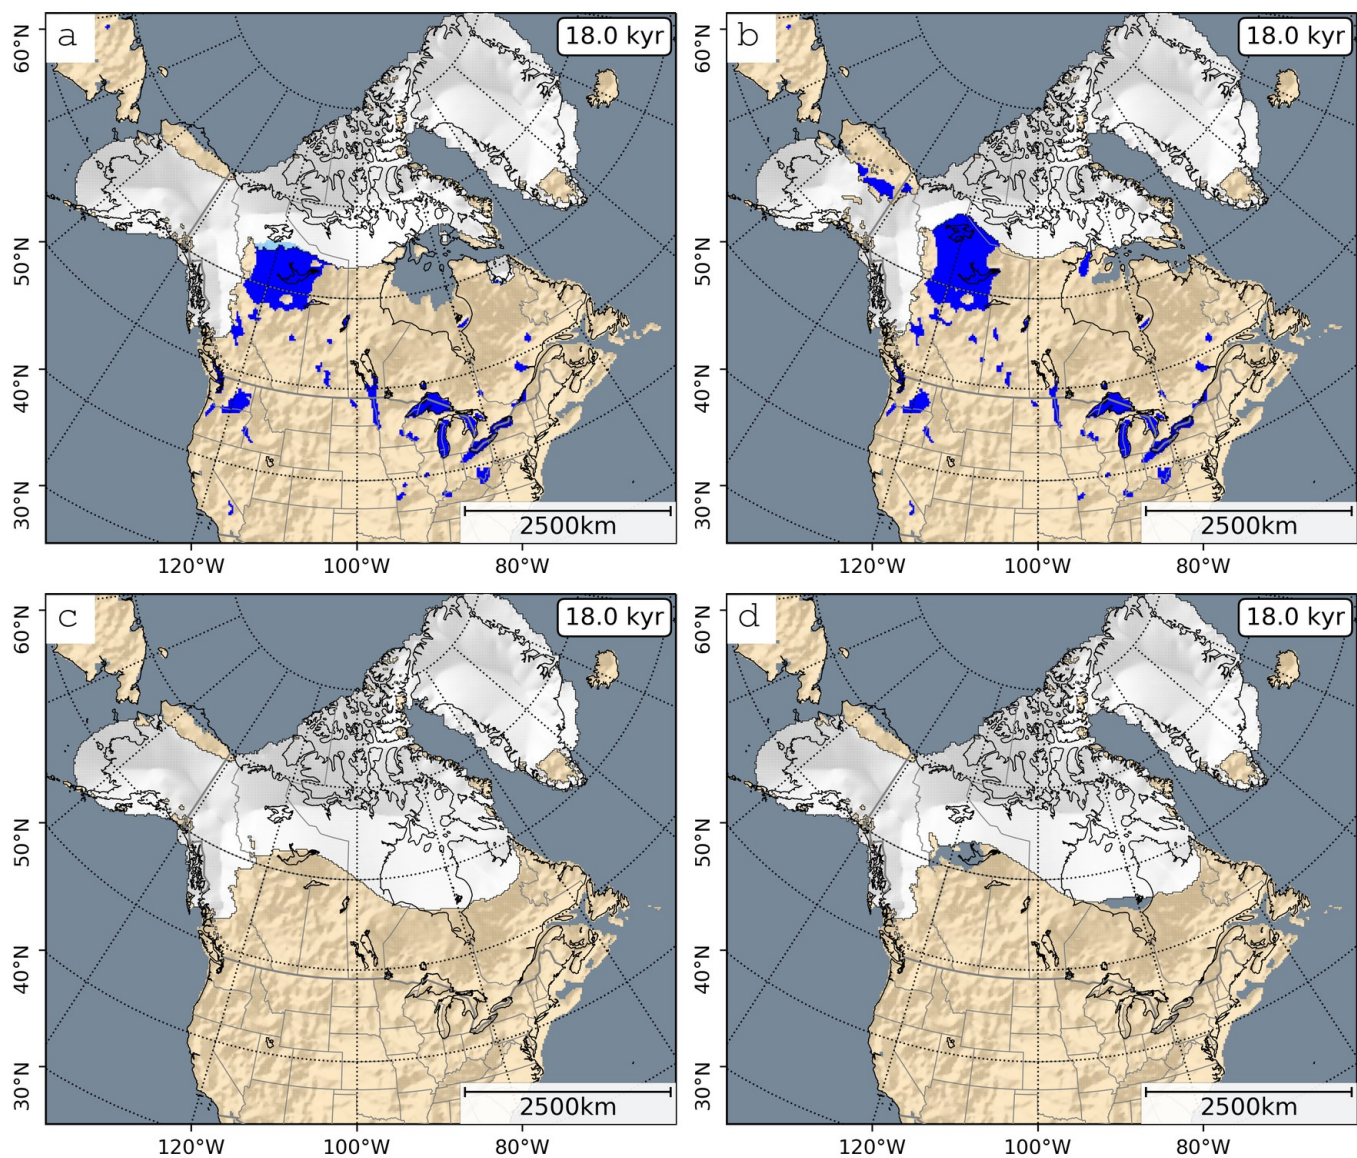

Figure S36: Overview map at 18000 kyr for the different experiments: a) LCC, b) LNS, c) Ctrl and d) Def.



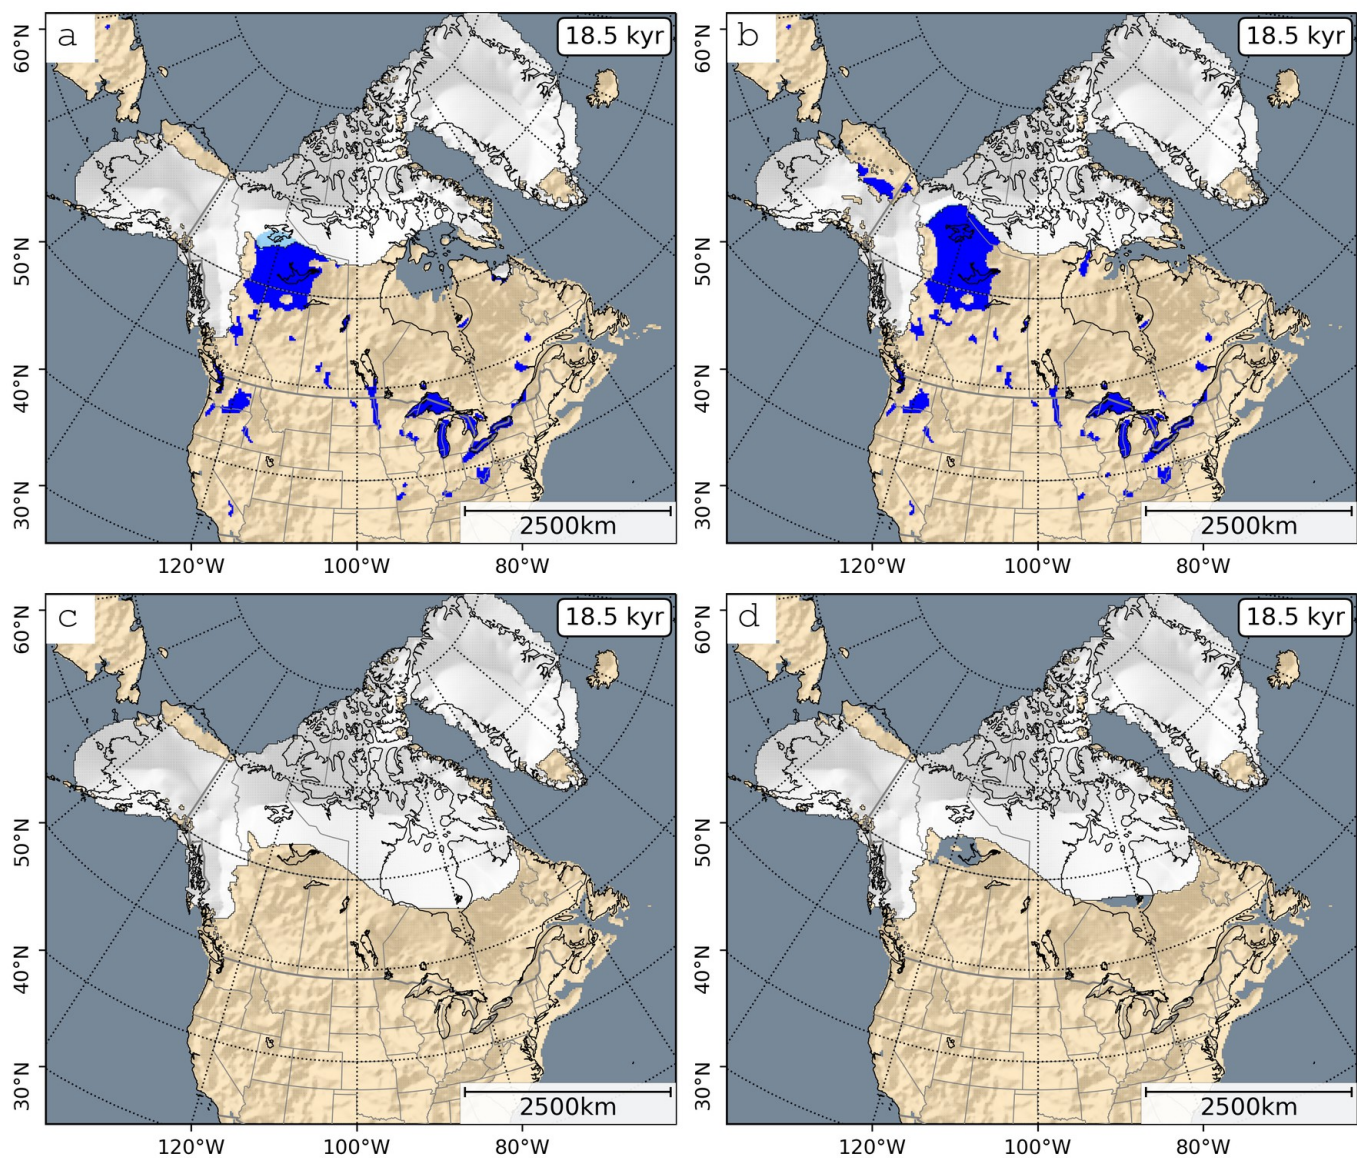

Figure S37: Overview map at 18500 kyr for the different experiments: a) LCC, b) LNS, c) Ctrl and d) Def.

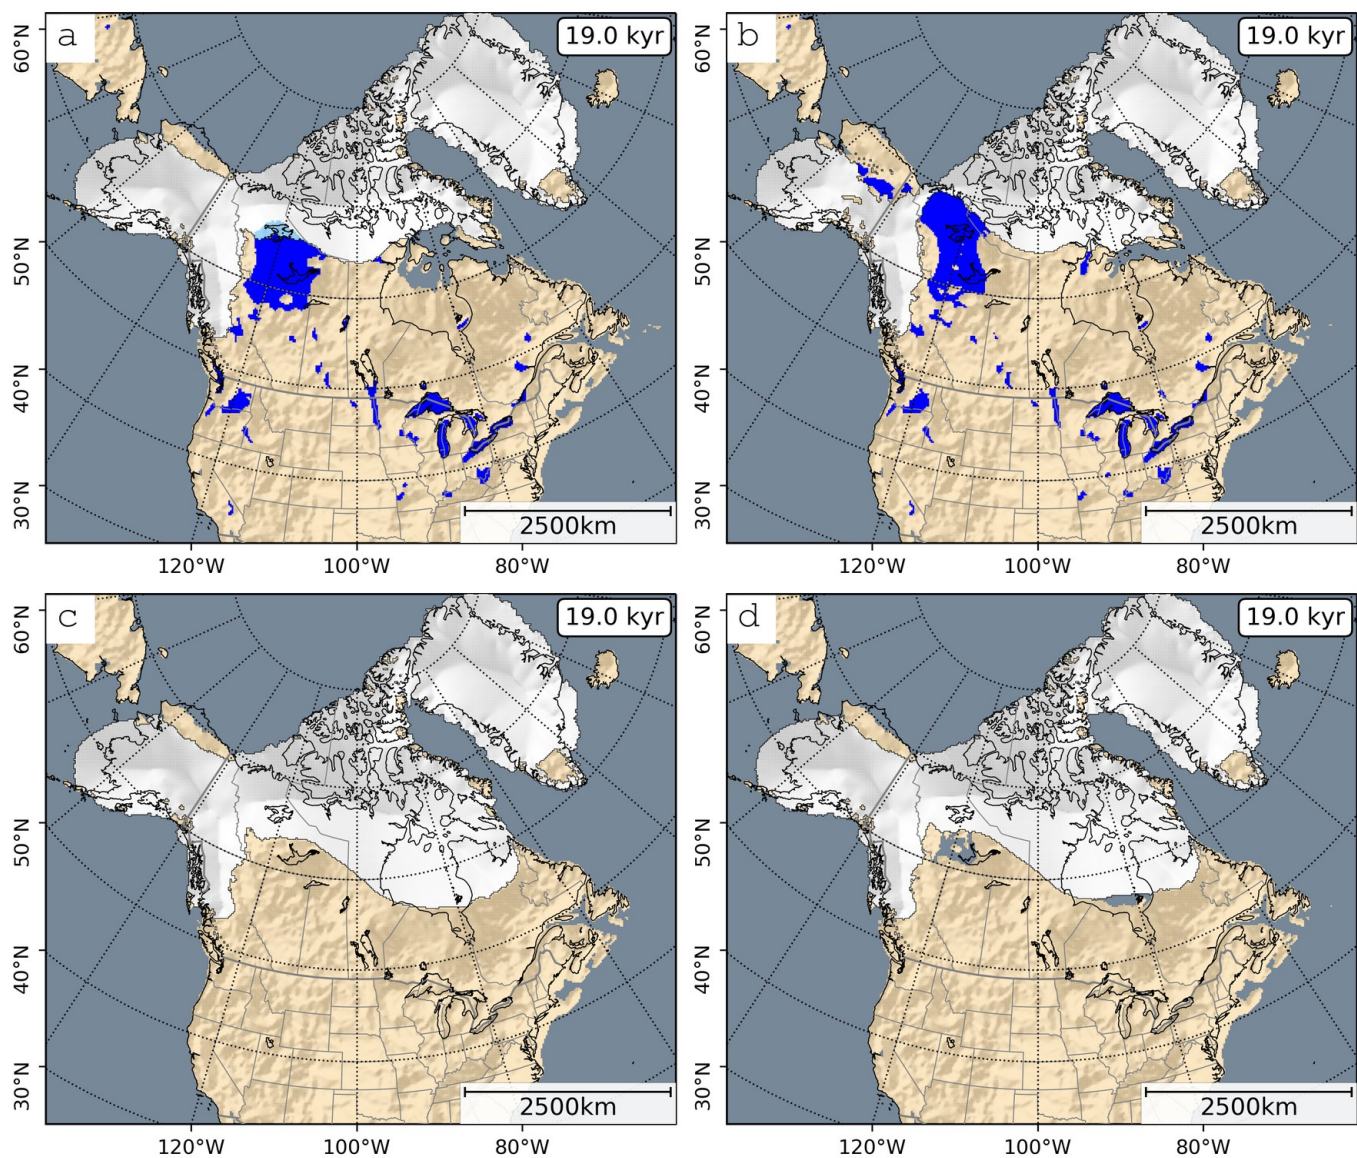

Figure S38: Overview map at 19000 kyr for the different experiments: a) LCC, b) LNS, c) Ctrl and d) Def.



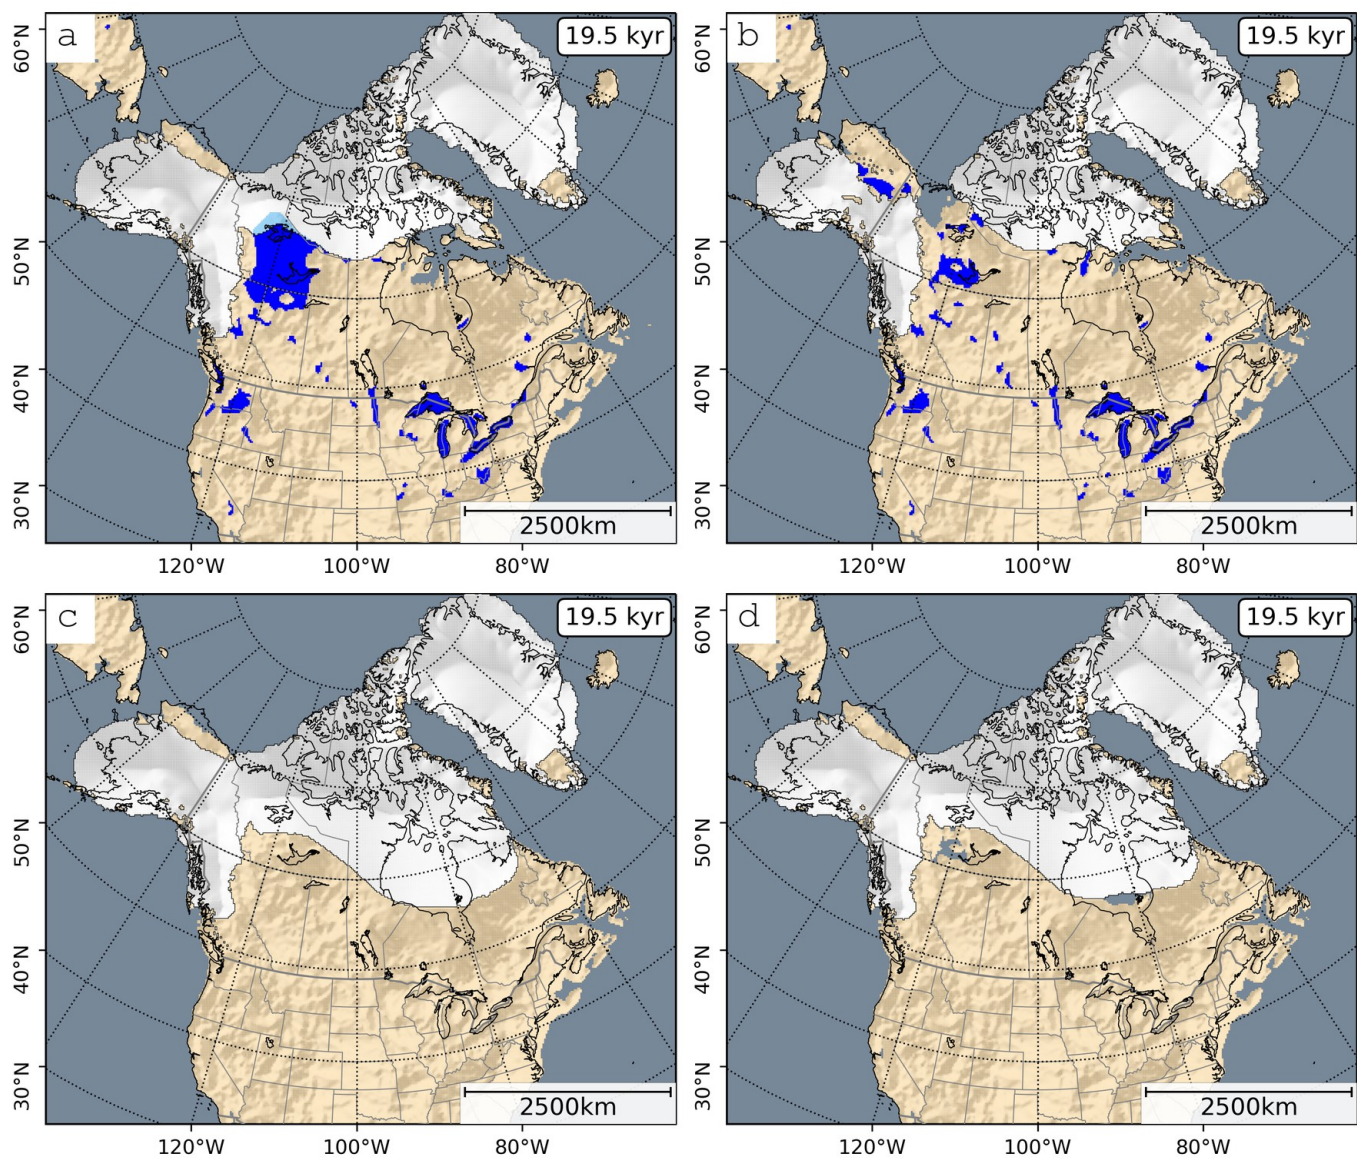

Figure S39: Overview map at 19500 kyr for the different experiments: a) LCC, b) LNS, c) Ctrl and d) Def.

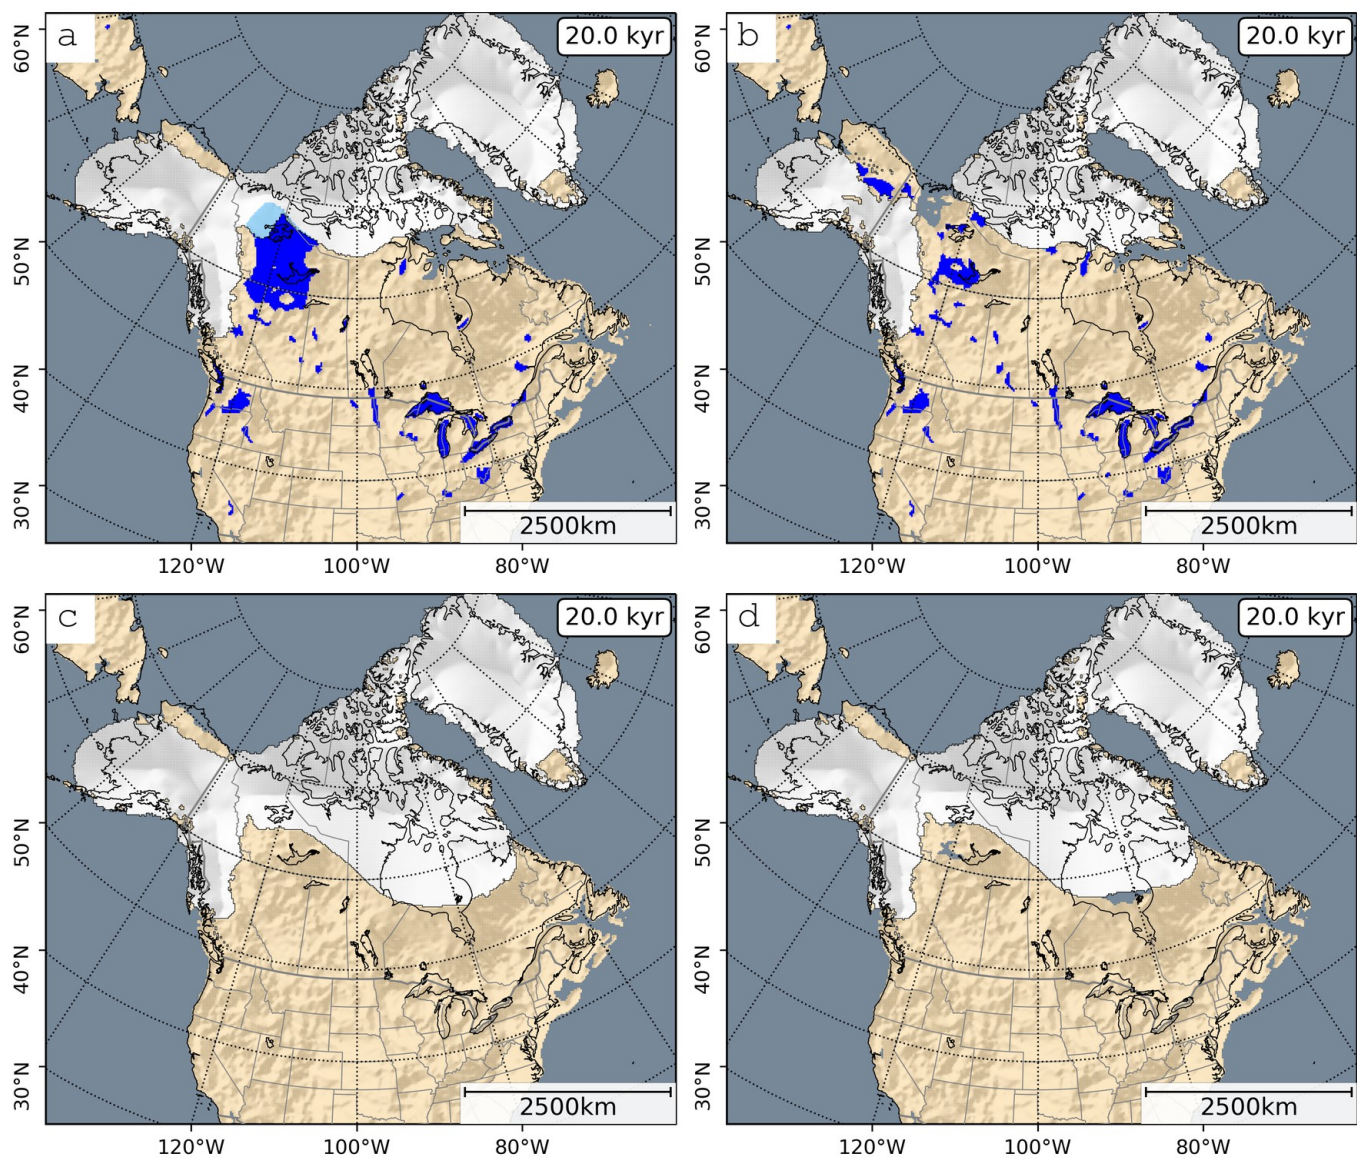

Figure S40: Overview map at 20000 kyr for the different experiments: a) LCC, b) LNS, c) Ctrl and d) Def.



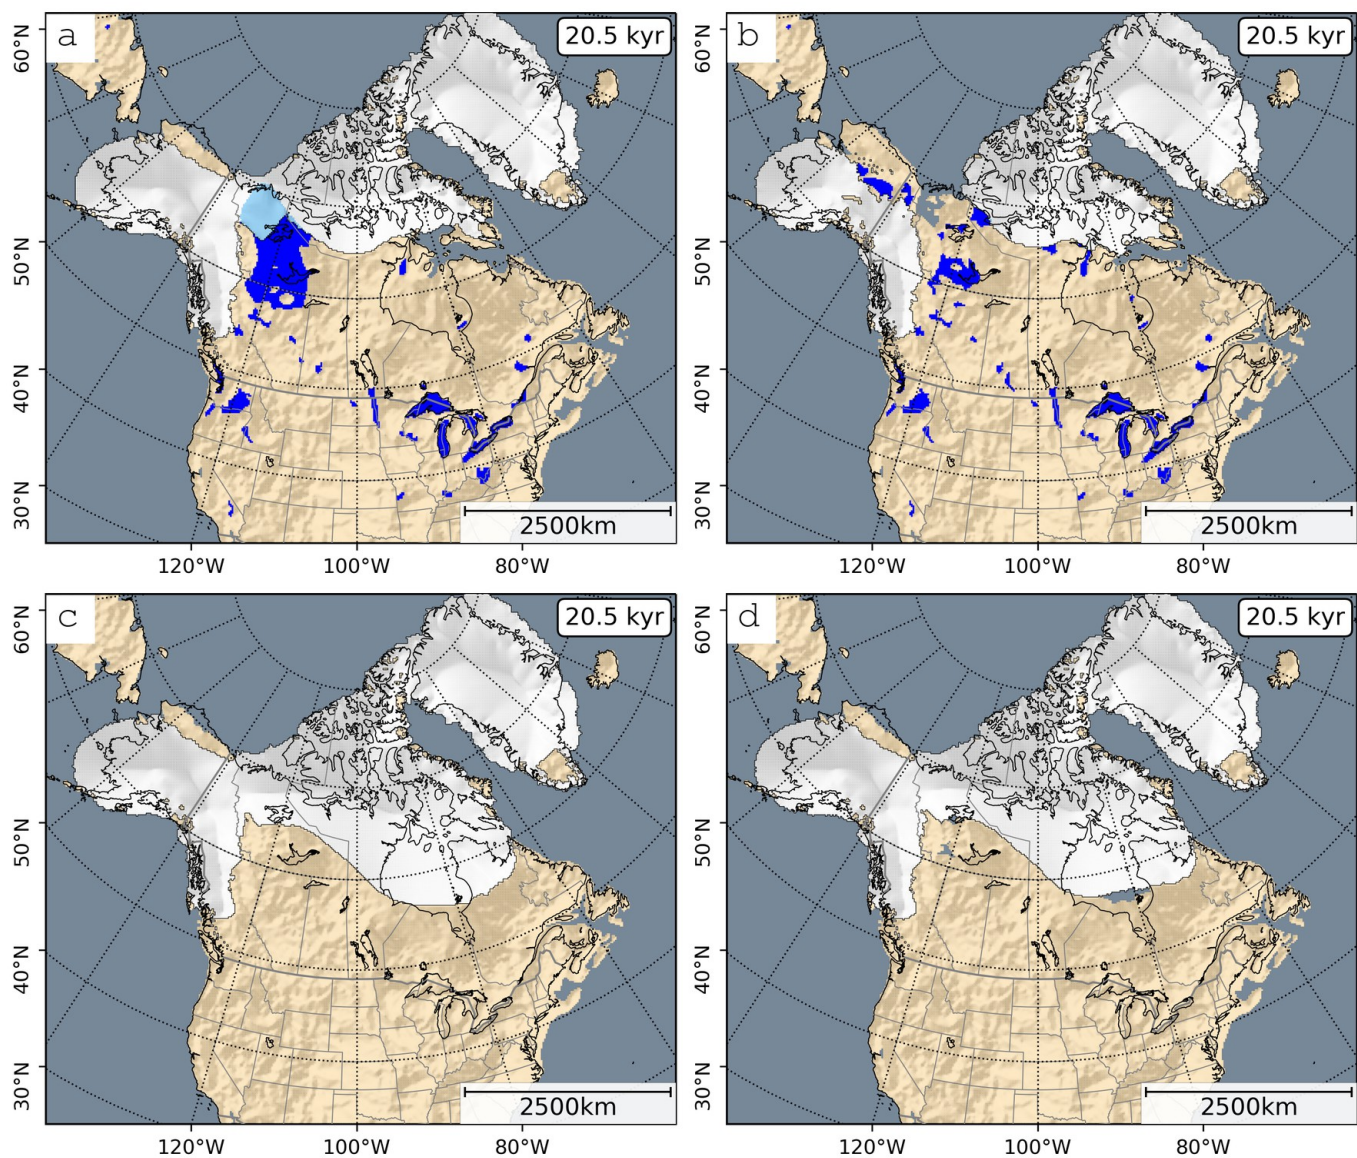

Figure S41: Overview map at 20500 kyr for the different experiments: a) LCC, b) LNS, c) Ctrl and d) Def.

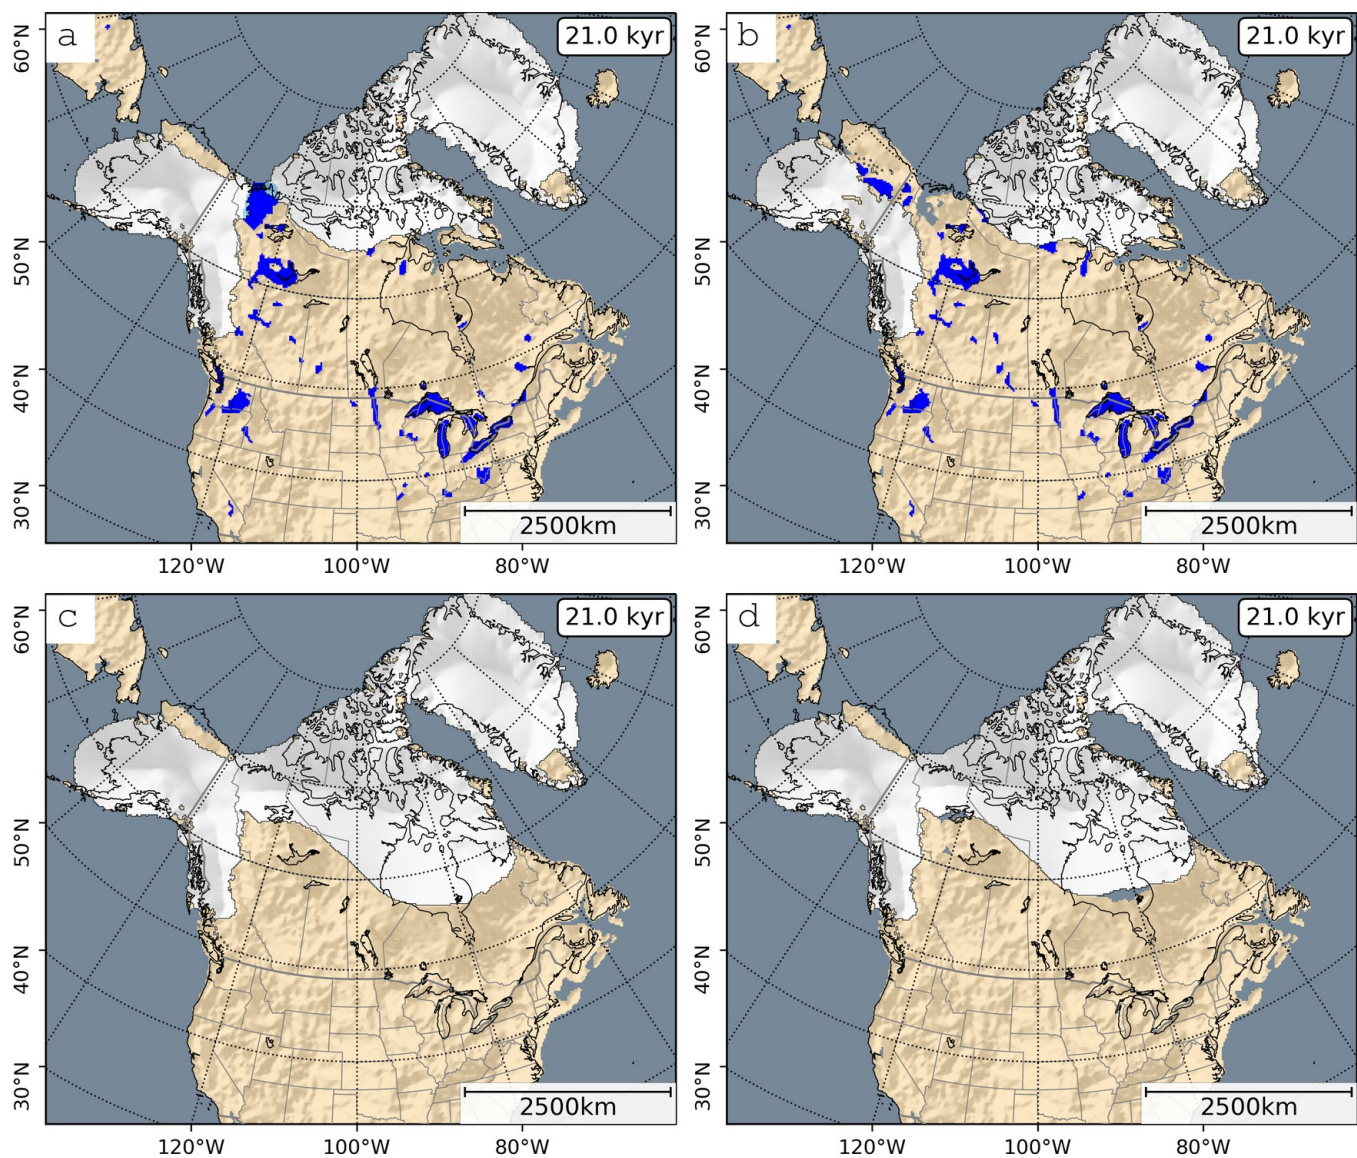

Figure S42: Overview map at 21000 kyr for the different experiments: a) LCC, b) LNS, c) Ctrl and d) Def.



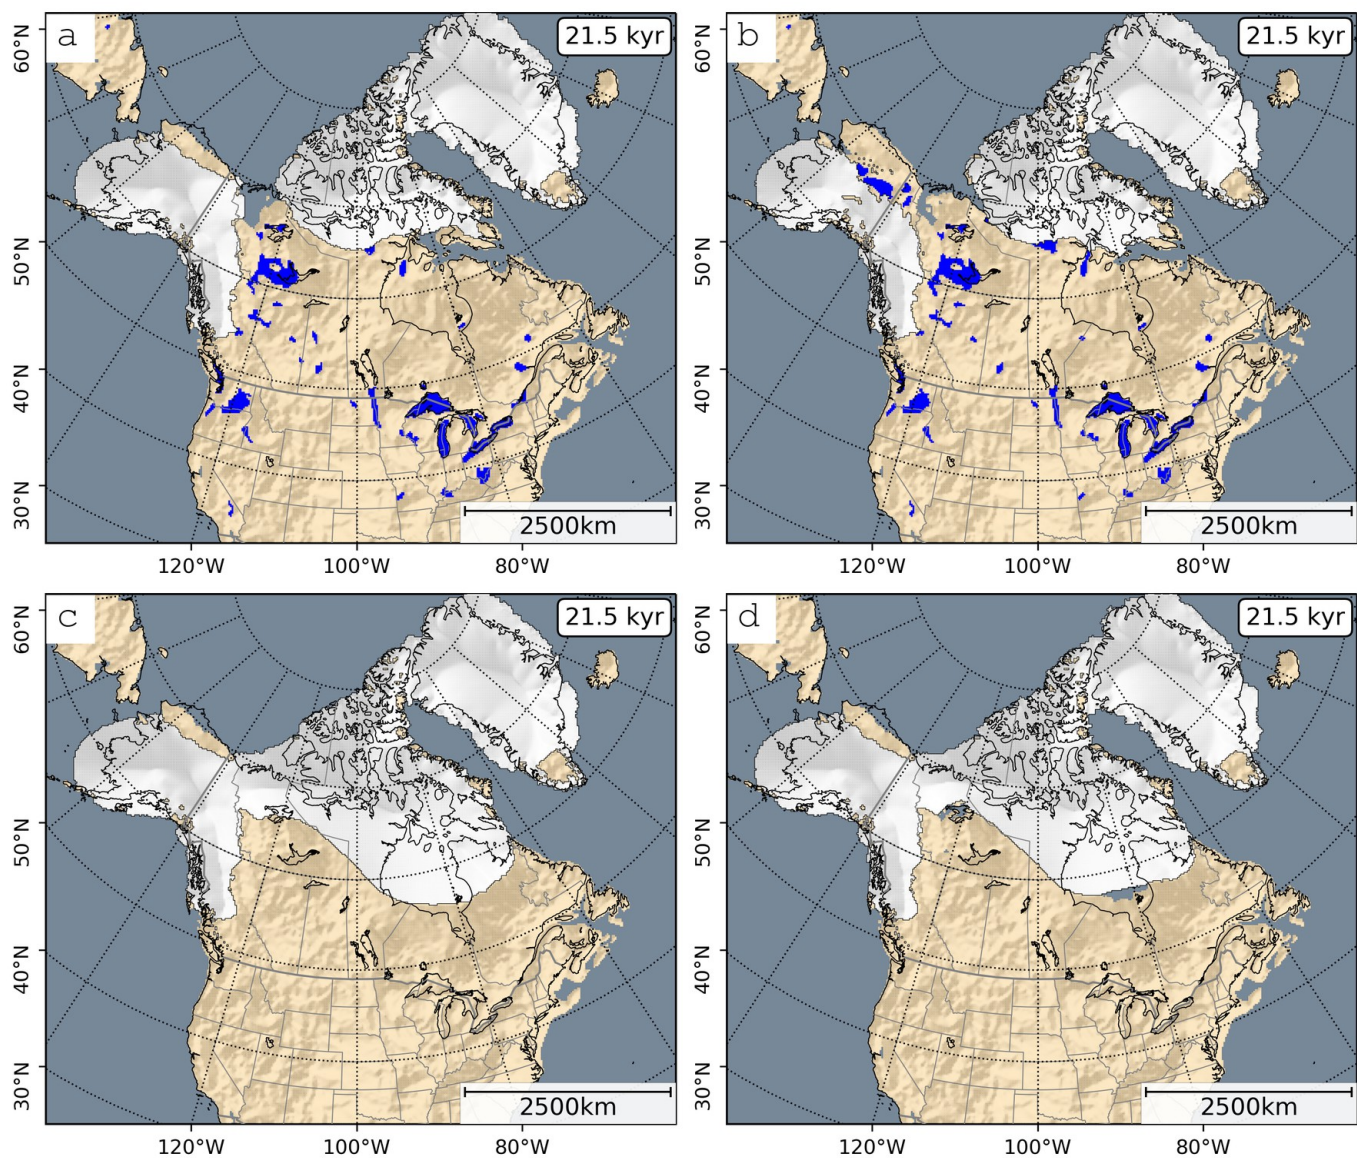

Figure S43: Overview map at 21500 kyr for the different experiments: a) LCC, b) LNS, c) Ctrl and d) Def.

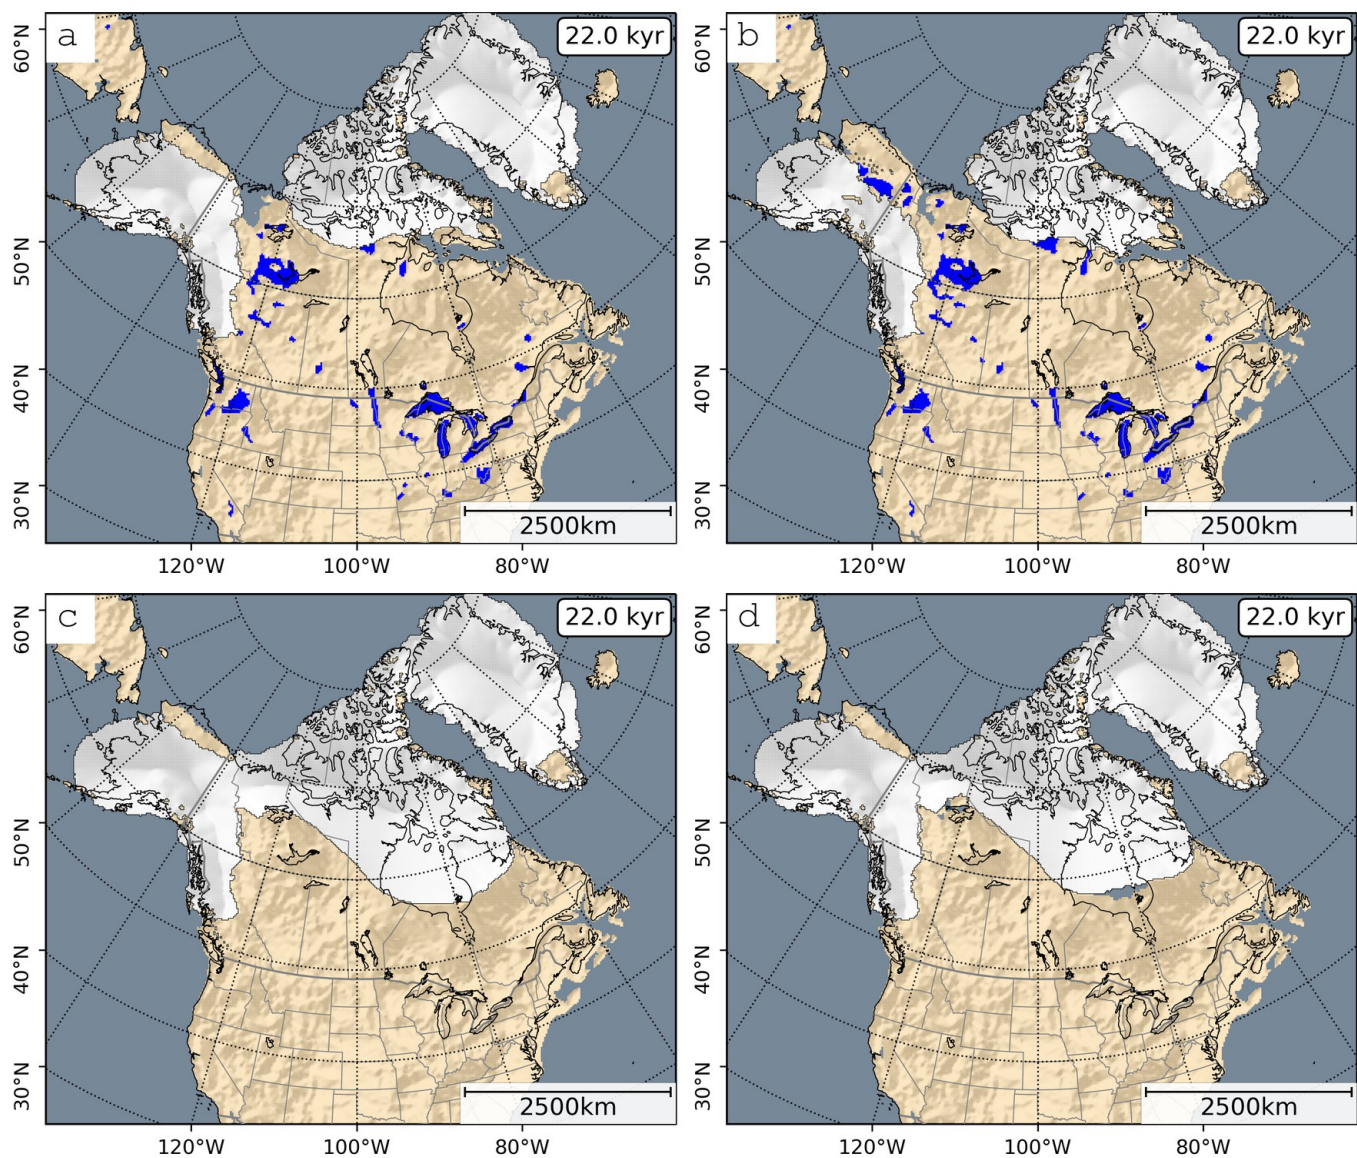

Figure S44: Overview map at 22000 kyr for the different experiments: a) LCC, b) LNS, c) Ctrl and d) Def.



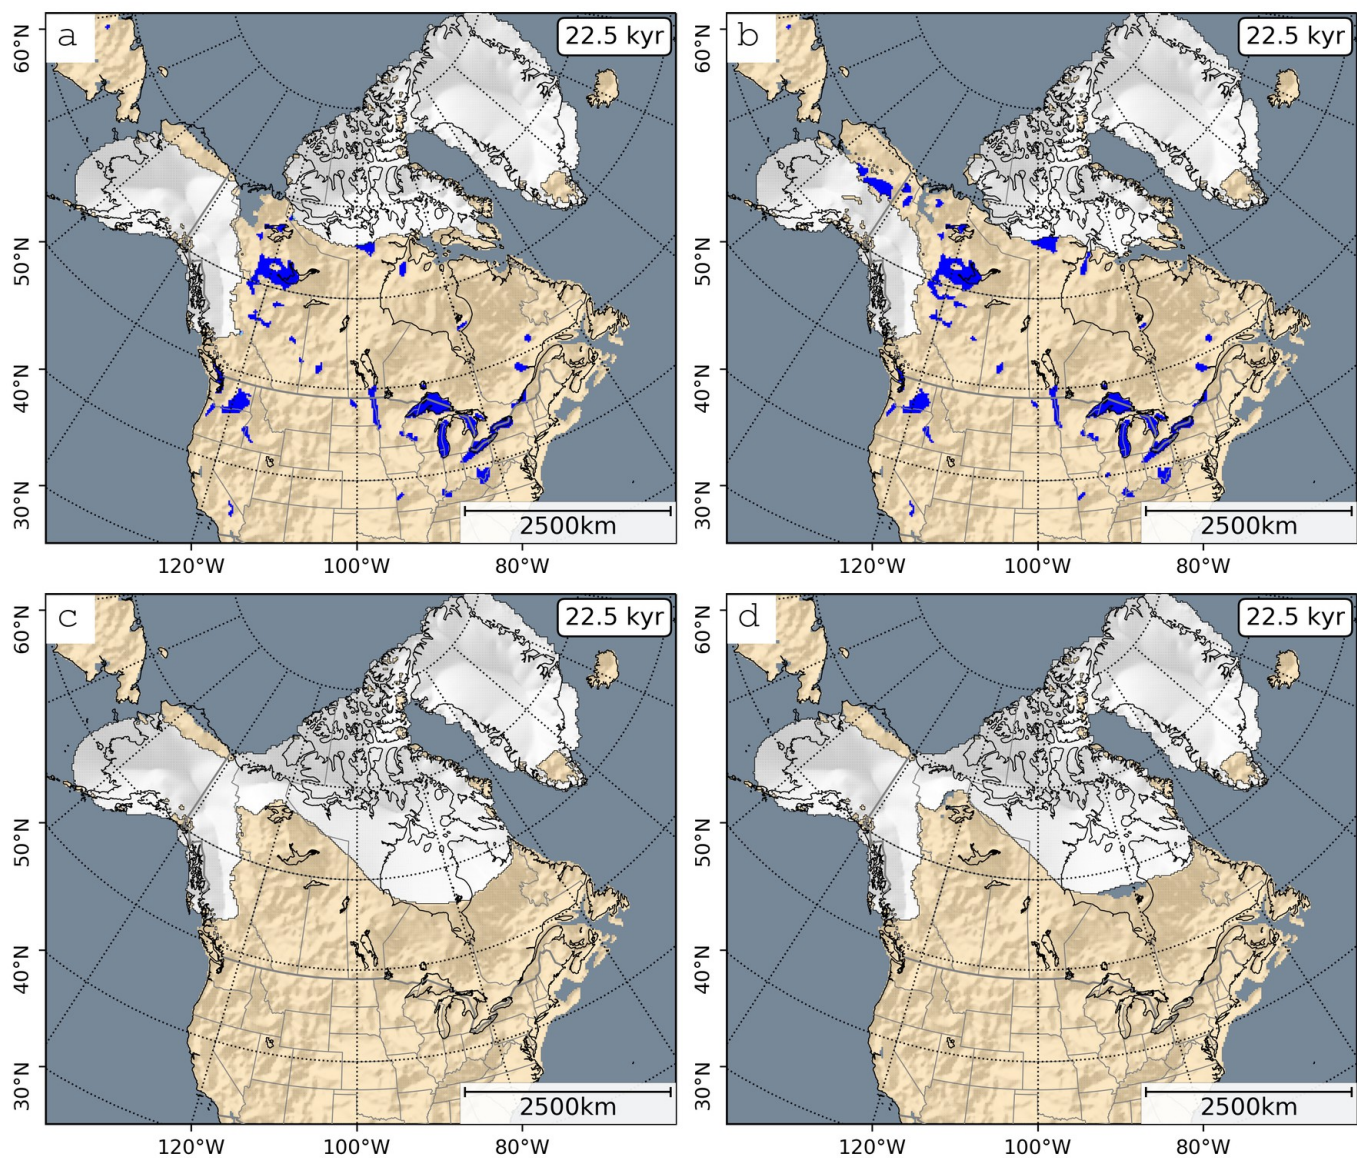

Figure S45: Overview map at 22500 kyr for the different experiments: a) LCC, b) LNS, c) Ctrl and d) Def.

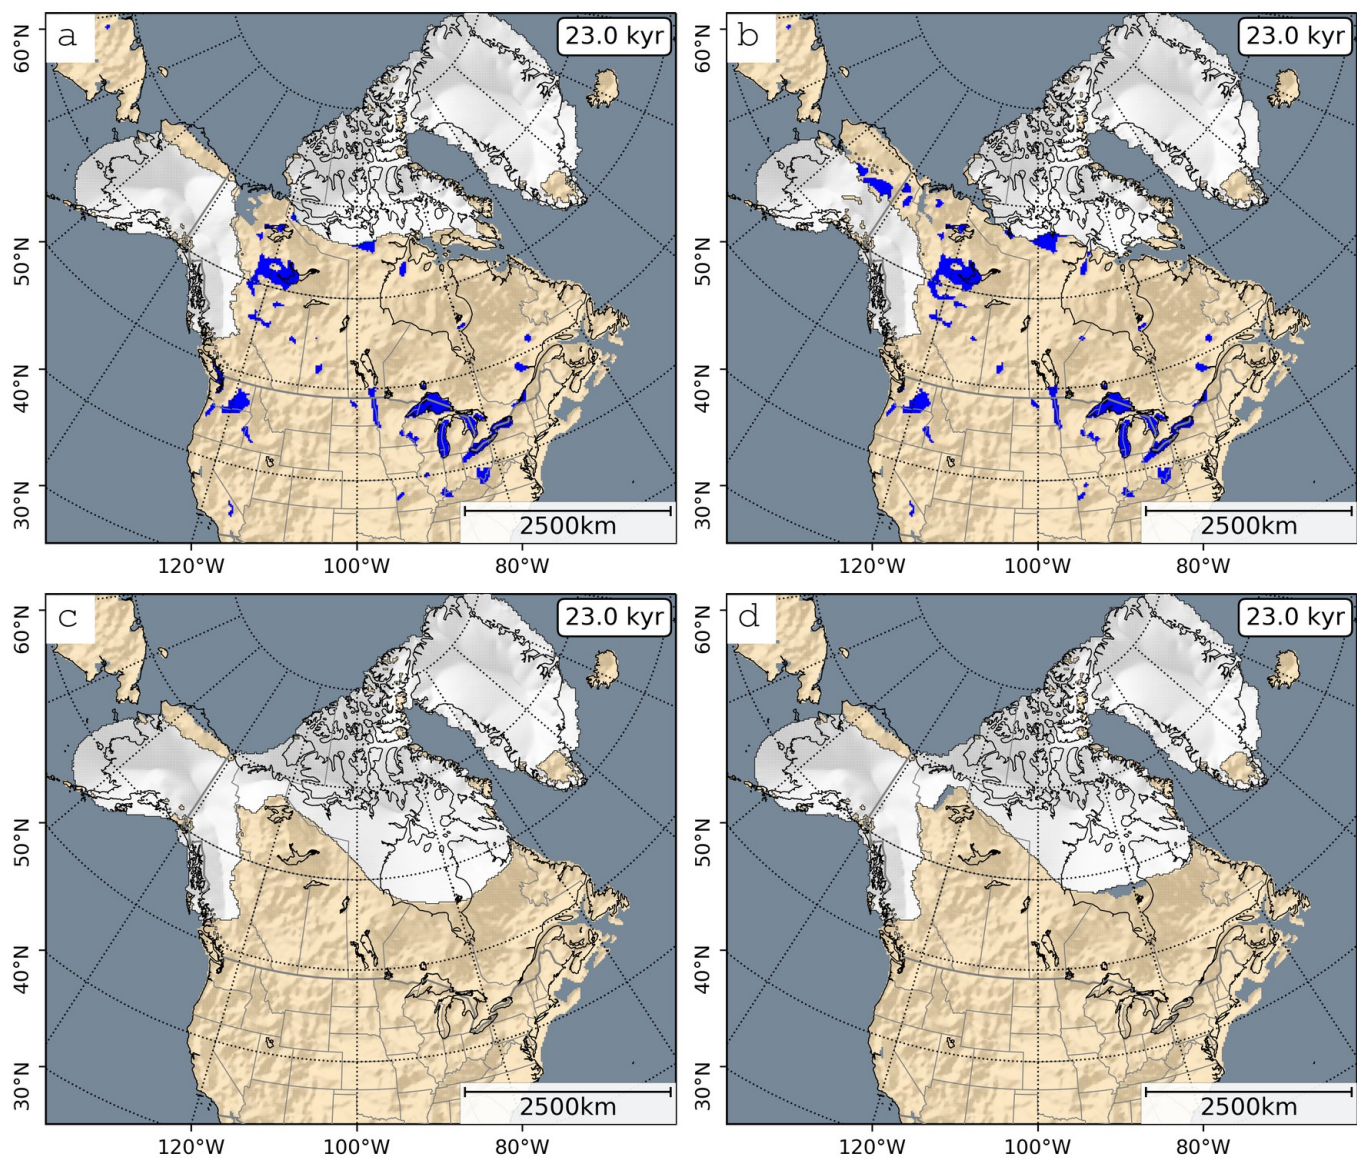

Figure S46: Overview map at 23000 kyr for the different experiments: a) LCC, b) LNS, c) Ctrl and d) Def.



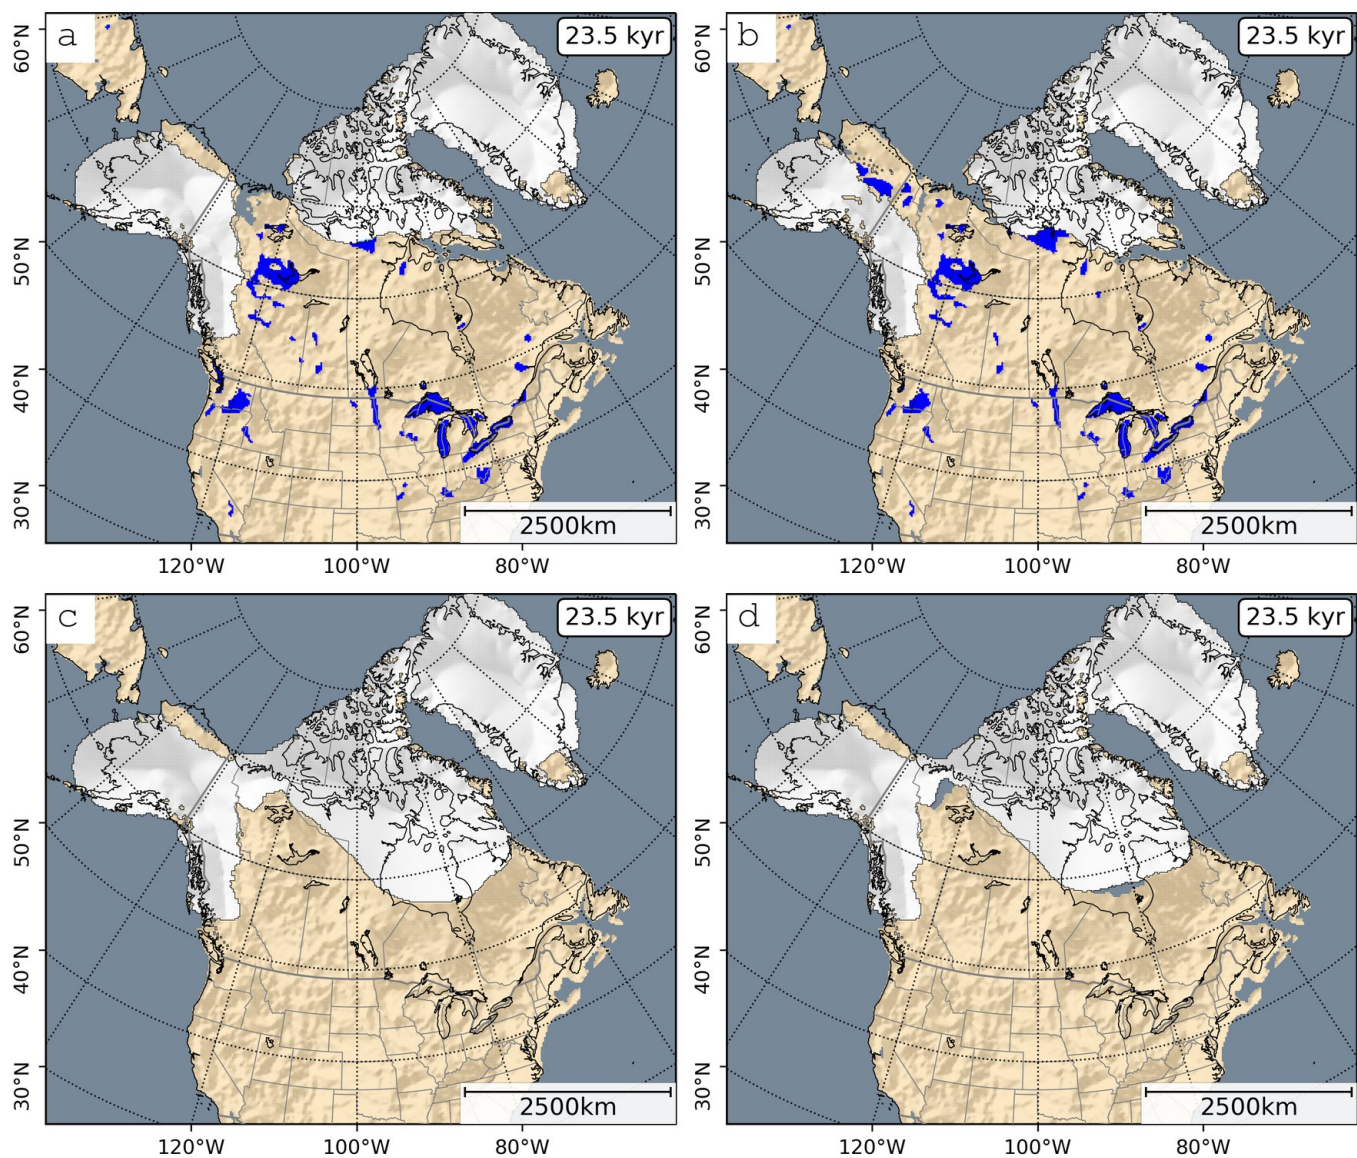

Figure S47: Overview map at 23500 kyr for the different experiments: a) LCC, b) LNS, c) Ctrl and d) Def.

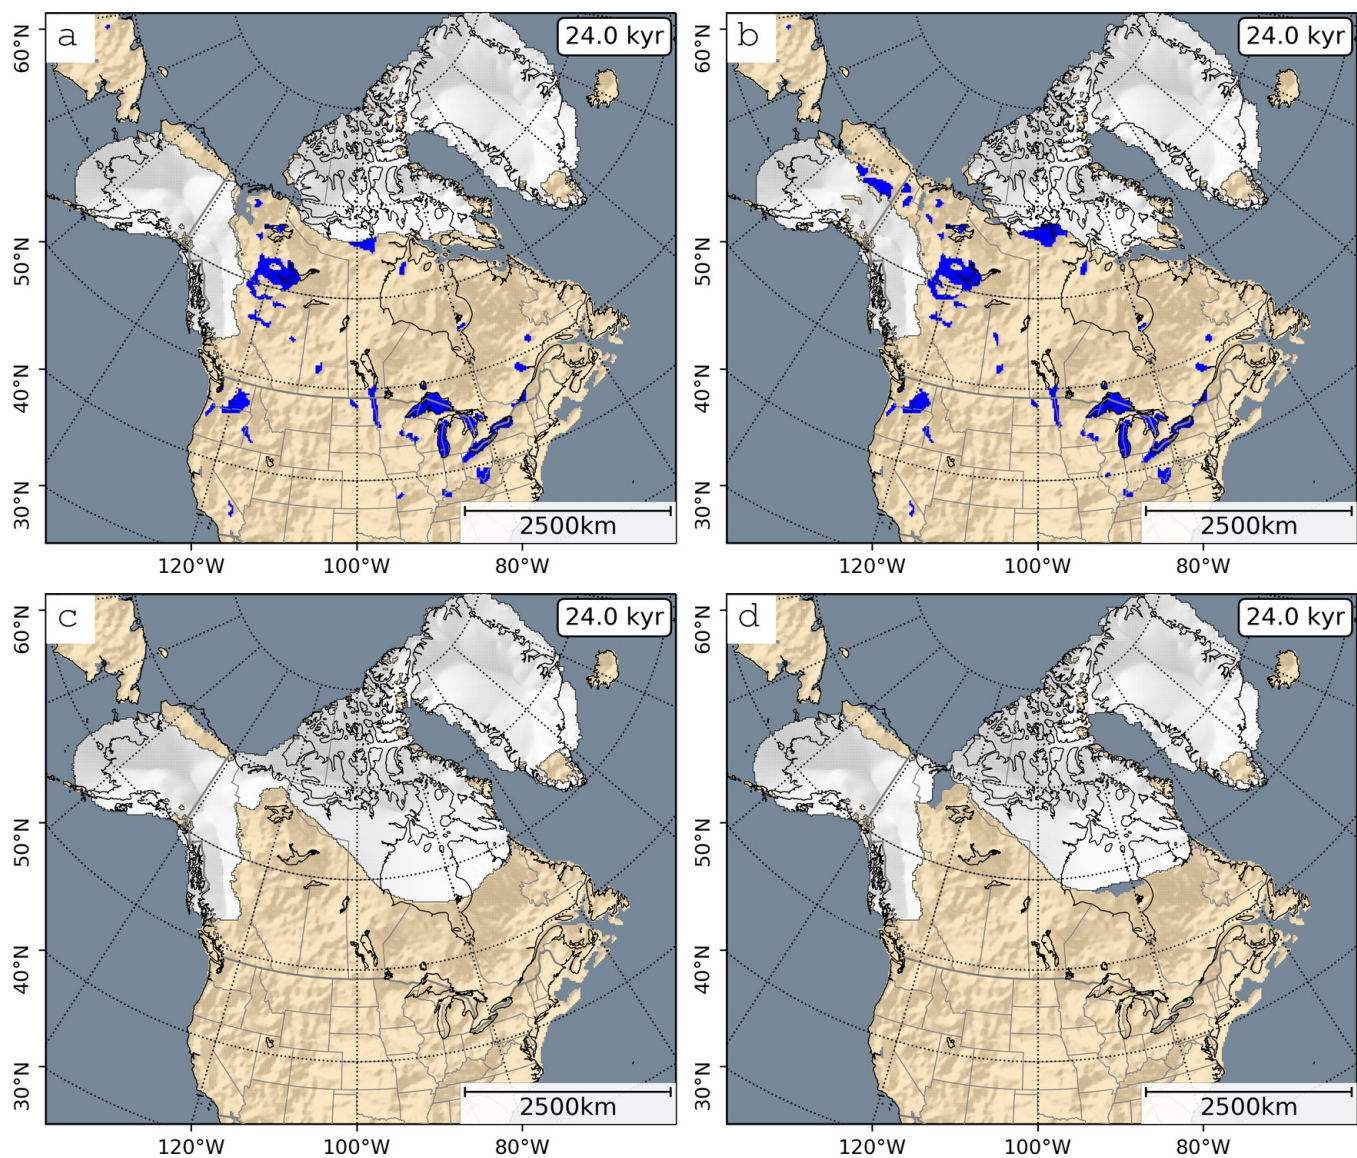

Figure S48: Overview map at 24000 kyr for the different experiments: a) LCC, b) LNS, c) Ctrl and d) Def.



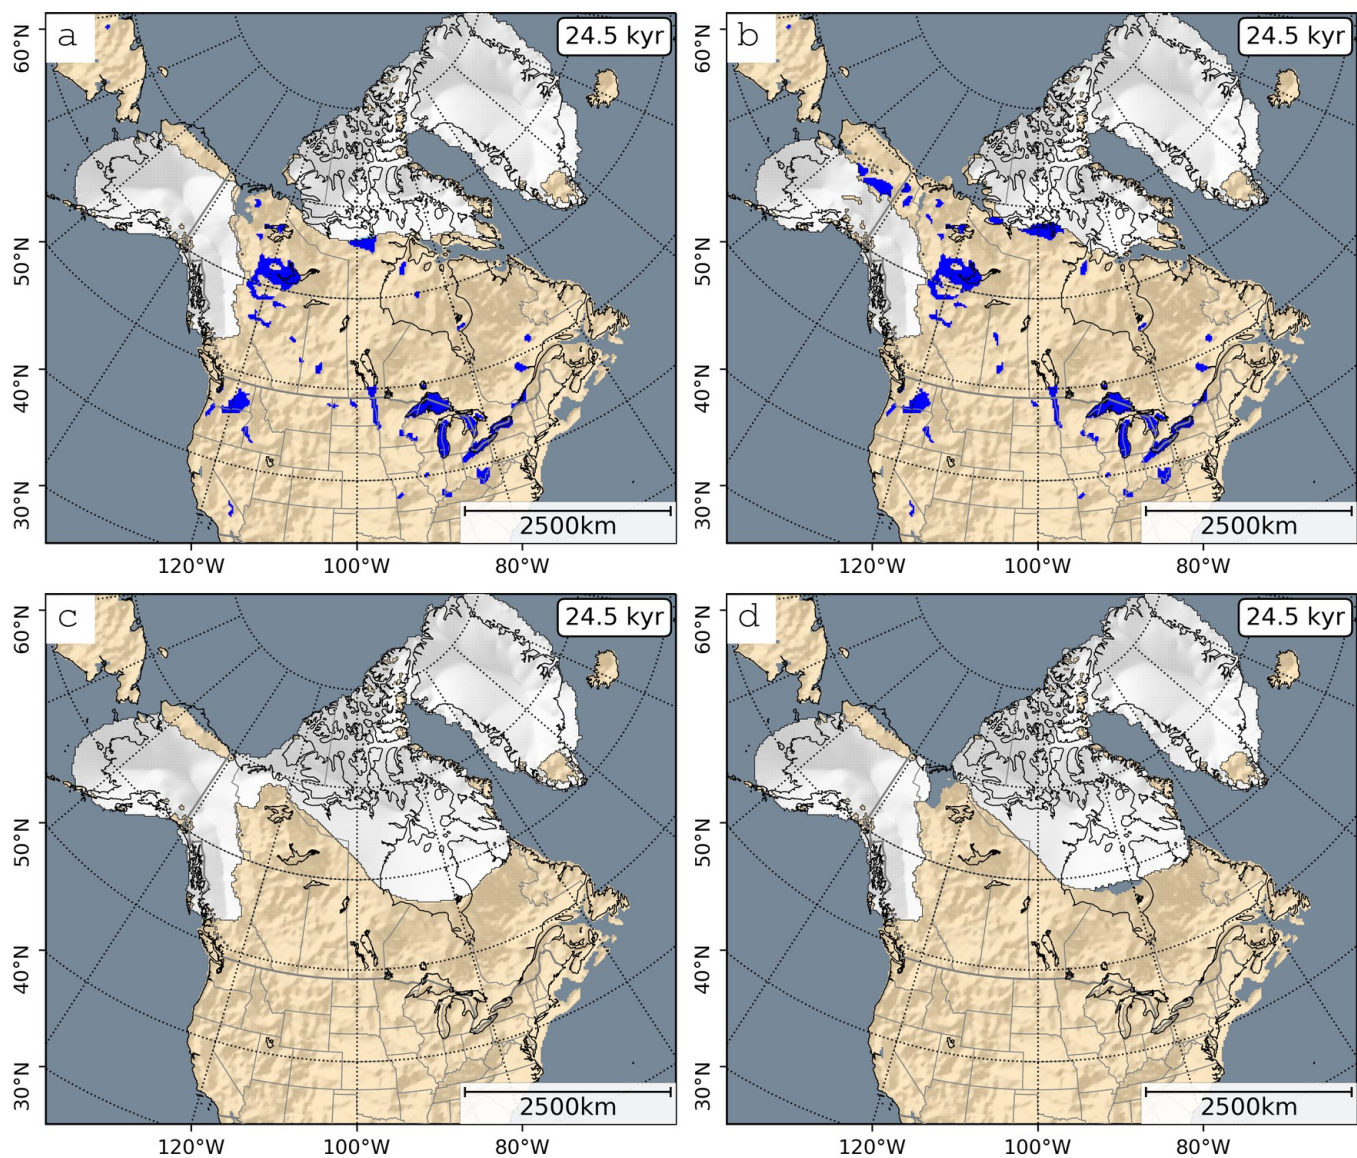

Figure S49: Overview map at 24500 kyr for the different experiments: a) LCC, b) LNS, c) Ctrl and d) Def.

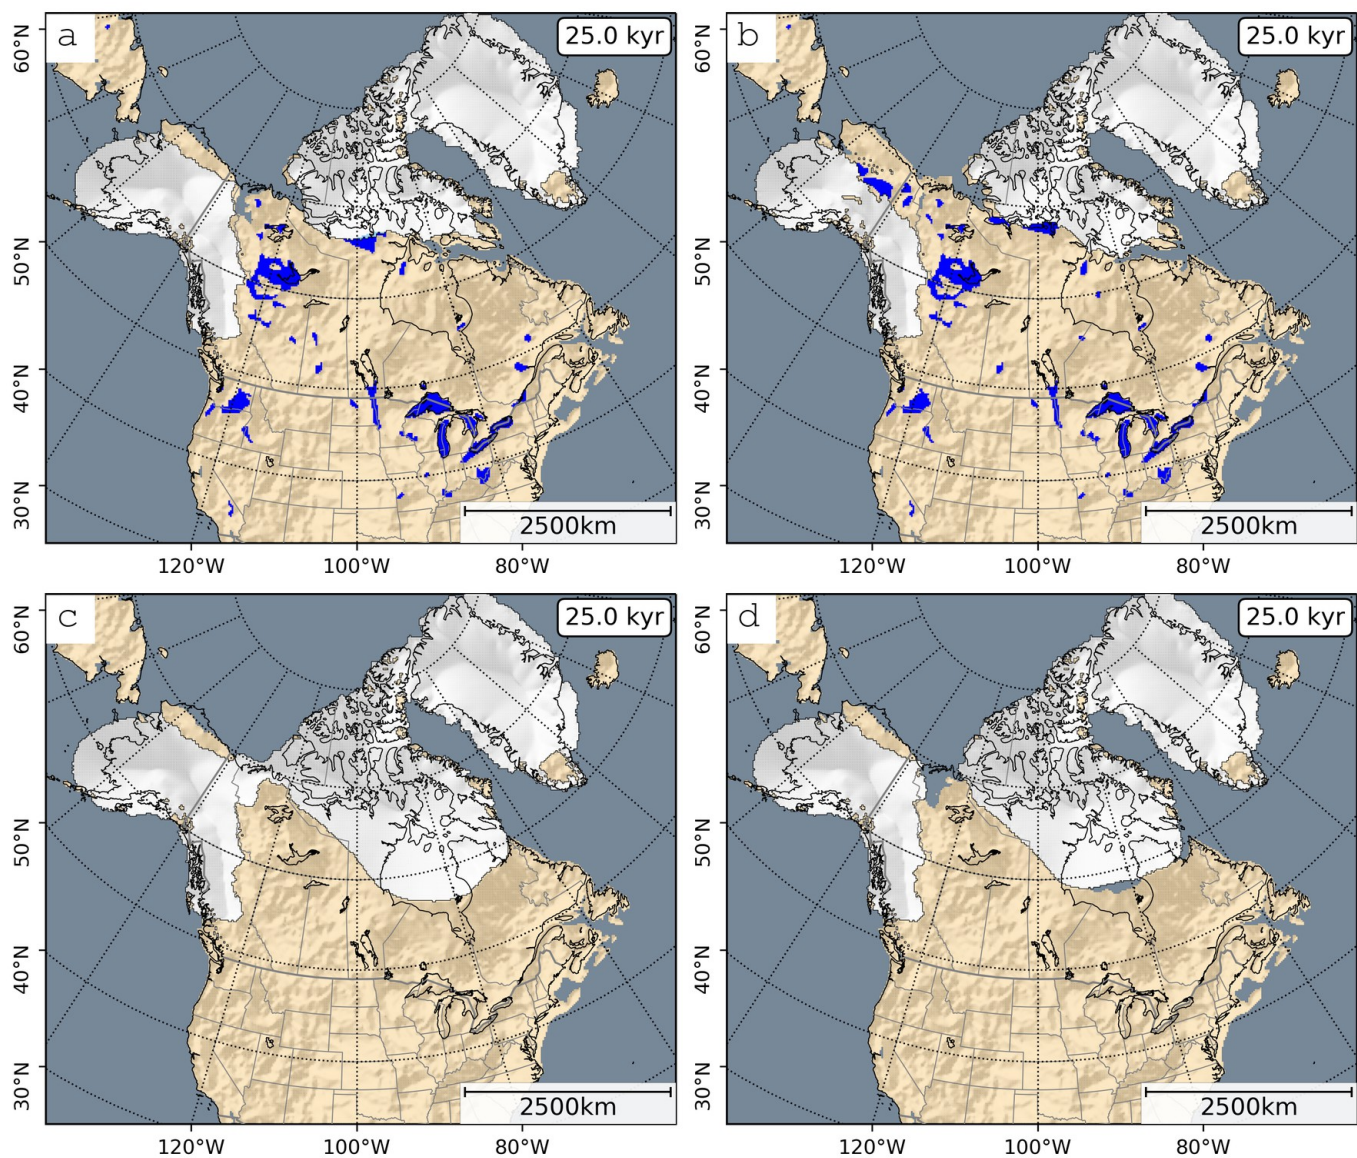

Figure S50: Overview map at 25000 kyr for the different experiments: a) LCC, b) LNS, c) Ctrl and d) Def.



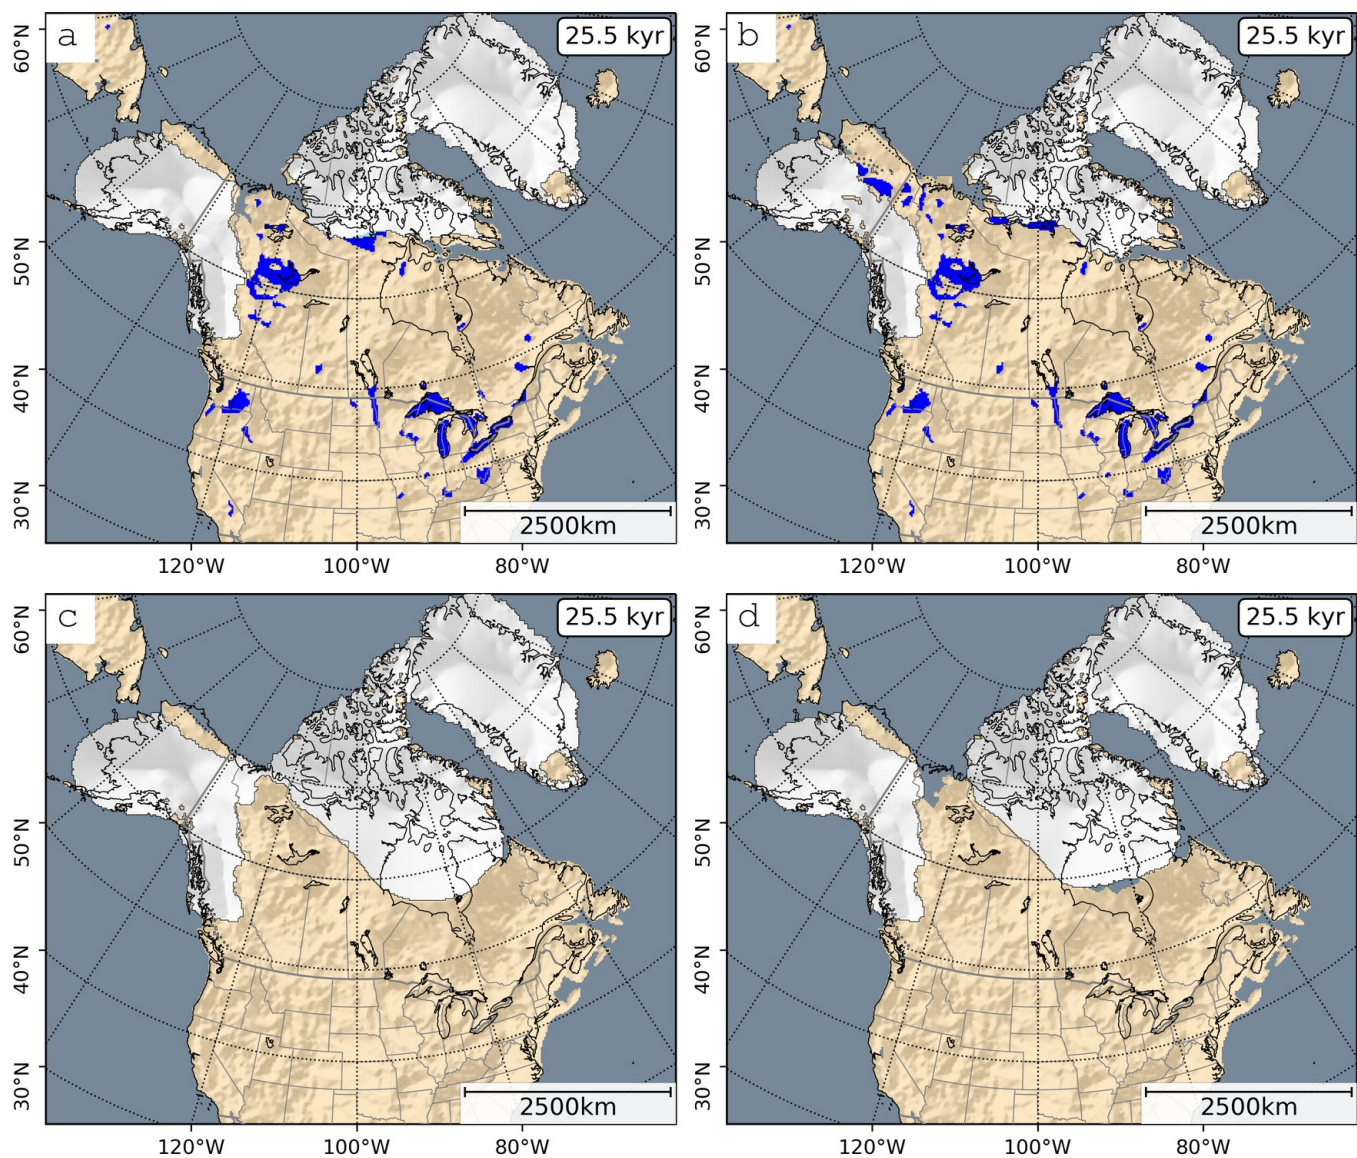

Figure S51: Overview map at 25500 kyr for the different experiments: a) LCC, b) LNS, c) Ctrl and d) Def.

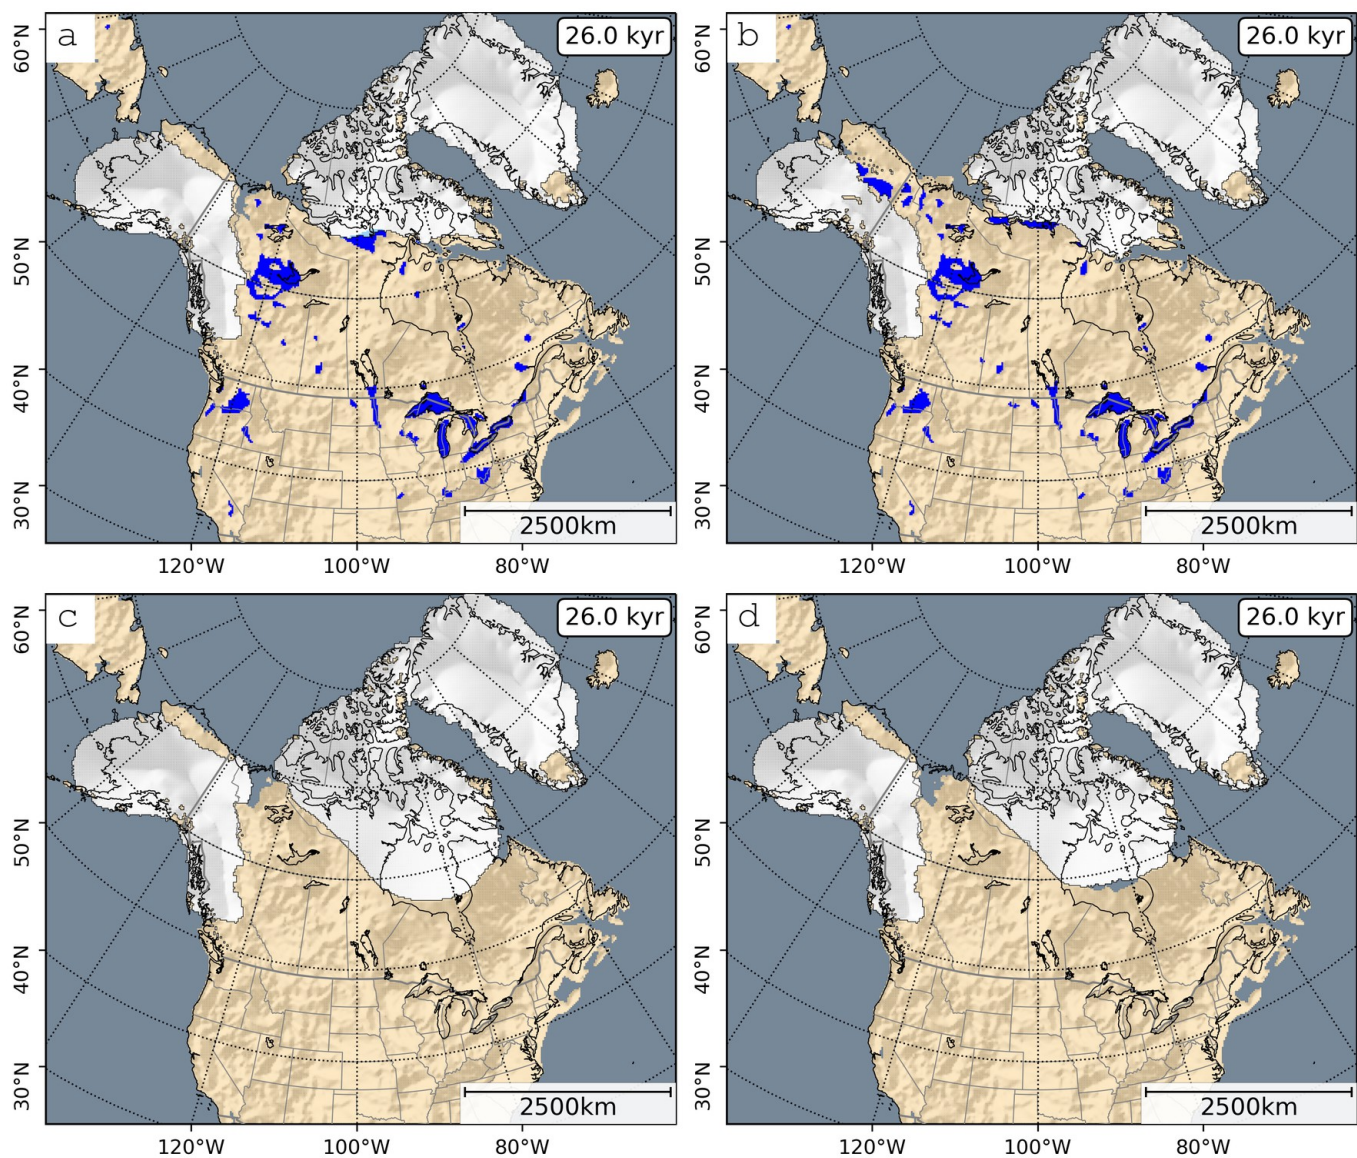

Figure S52: Overview map at 26000 kyr for the different experiments: a) LCC, b) LNS, c) Ctrl and d) Def.
